# Supplementary material for: A Novel and Open-Source Application for Vasculature Dataset Analysis and Visualization
Source: Research Square preprint supplement (doi:10.21203/rs.3.rs-608609/v1), 2021-06-11
Supplement: Supplementary file 1 [file 12fde0ee49ac7df5e5abe3c7.docx]

**Supplemental Notes**

**Contents:**

1. **Overview**
2. **Example**
3. **Pseudocode**
4. **Clique Occurrence Results**

**1. Branchpoint Clique Removal Pseudocode**

VesselVio analyzes vascular networks by skeletonizing the datasets, identifying edges between centerline points (based on 26-neighborhood connectivity), and creating undirected graphs with the resulting points and edges. Vessel endpoints, segments, and branch points can be identified from this graph by examining the degree of connectivity of each vertex (i.e., how many neighbors each vertex has).

An issue with identifying branch points from these naïve graphs is that vertices at branch point junctions often form small loops, or ‘cliques’, because of their proximity in digital space. This leads to artificially inflated branch point counts. VesselVio filters spuriously labeled branch points by weighting branch point cliques based on radius, neighbor radius, and degree of connectivity to select remaining branchpoint candidates. Examination of numerous types of datasets led to the identification of 13 common cliques, dubbed *classes*. Filters were built for each class.

Each identified clique is classified and passed through the appropriate clique filter. From examination of the inferior colliculus segmentation results, class 1-4 cliques represent over 95% of identified cliques.

**2. Example Class 1 Clique Correction**


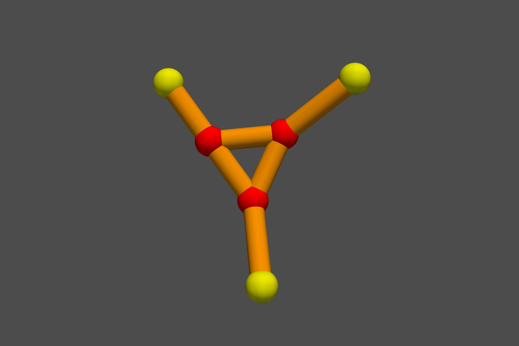

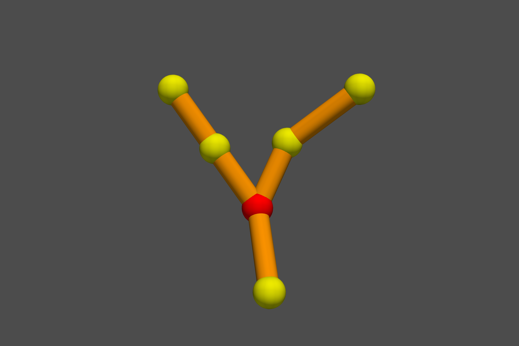


**Naïve Graph**

**Filtered Graph**

**Correction**

Red – Branch point

Yellow – Segment point

**3. Clique Filter Pseudocode**

Branchpoints = Subgraph of main graph containing only branchpoints

Cliques = Subgraph of Branchpoints containing only Cliques

FUNCTION Delete_Edges(vertices):

IF largest radius exists among vertices:

Remove edges between smallest vertices

ENDIF

ELSE:

Find radius of vertex neighbors from main graph

Sort vertices based on self-radius and neighbor radius weighting

Delete edges between smallest two vertices

ENDELSE


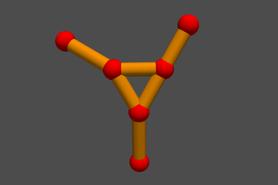


Class 1

FOR each Clique in Cliques:

IF Clique class is 1: # Three 3-degree branchpoints

CALL Delete_Edges with clique

END IF


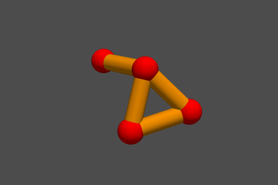


Class 2

IF Clique class is 2: # One 3-degree, one 1-degree, and two 2-degree

Find radius of each branchpoint candidate with degree greater than 1

CALL Delete_Edges with candidates

ENDIF


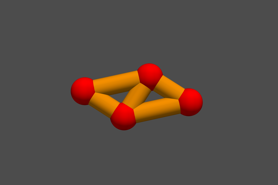
 IF Clique class is 3: # Two 2-degree and two 3-degree branchpoints

Find radius of each branchpoint candidate with degree of 3

CALL Delete_Edges with candidates


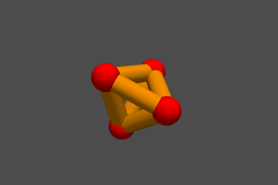
 ENDIF

Class 3

IF Clique class if 4: # Four 3-degree branchpoints

Find radius of each branchpoint candidate in Clique

CALL Delete_Edeges with candidates

Class 4


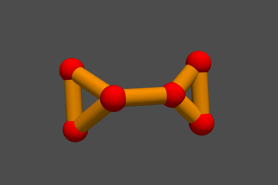
 ENDIF

IF Clique class is 5: # Two 3-degree, four 2-degree branchpoints

FOR branchpoints in Clique:

IF degree of branchpoint is 3:

Class 5

Small_Clique = branchpoint + 2-degree neighbors

CALL Delete_Edges with Small_Clique

ENDIF

ENDFOR

ENDIF


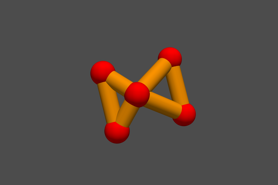
 IF Clique class is 6: # One 4-degree and four 2-degree branchpoints

FOR branchpoints in Clique:

IF degree of branchpoint is 2:

Small_Clique = connected neighborhood

Class 6

CALL Delete_Edges with Small_Clique


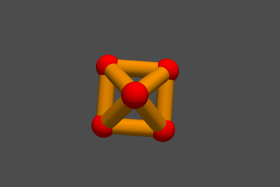
 ENDIF

ENDFOR

ENDIF

IF Clique class is 7 or 8: # One 4-degree and four 3-degree branchpoints

Find 4-degree branchpoint

Class 7


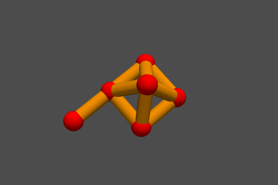
 Delete edges between 3-degree points.

ENDIF

IF Clique class is 9 or 10: # 1-, 2-, 3-, and 4-degree branchpoints

FOR branchpoint in Clique:

Class 8

Small_Clique = Branchpoint + 2-degree neighbors


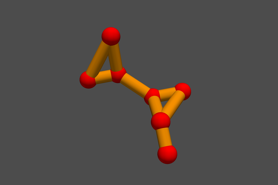

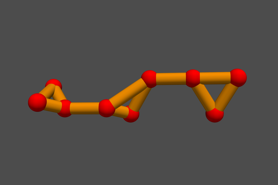
 IF size(Small_Clique) == 3:

CALL Delete_Edges with Small_Clique

ENDIF

ENDFOR

Class 10

Class 9

ENDIF

IF Clique class is 11 or 12: # 3-, 4-, and 5-degree branchpoints

FOR branchpoint in Clique:

Delete edges between 2-degree branchpoints

ENDFOR

ENDIF

IF Clique class is 13: 2-, 3-, and 5-degree branchpoints

Delete edges between 3-degree and 2-degree branchpoints

ENDIF


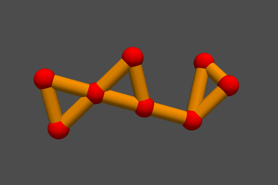

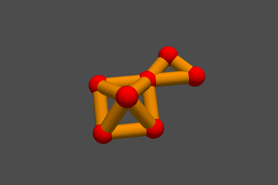

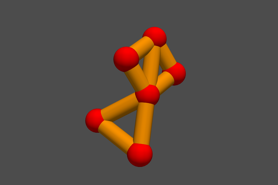


Class 11

Class 12

Class 13

**4. Clique results from inferior colliculus segmentations**
