# Supplementary material for: A Novel and Open-Source Application for Vasculature Dataset Analysis and Visualization
Source: Research Square preprint supplement (doi:10.21203/rs.3.rs-608609/v1), 2021-06-11
Supplement: Supplementary file 3 [file 65e6fd5298439762fa8a0ad3.xlsx]

## Sheet: Main Results
			Main Results									Number of Segments per Radius Bin																					Mean Length of Segments per Radius Bin
		File Name	Volume (µm³)/Area (µm²)	Skeleton Length (µm)	Branchpoints	Endpoints	Number of Segments	Mean Segment Length (µm)	Mean Segment Radius (µm)	Mean Segment Tortuosity	Segment Partitioning	0 - 1	1 - 2	2 - 3	3 - 4	4 - 5	5 - 6	6 - 7	7 - 8	8 - 9	9 - 10	10 - 11	11 - 12	12 - 13	13 - 14	14 - 15	15 - 16	16 - 17	17 - 18	18 - 19	19 - 20	20+	0 - 1	1 - 2	2 - 3	3 - 4	4 - 5	5 - 6	6 - 7	7 - 8	8 - 9	9 - 10	10 - 11	11 - 12	12 - 13	13 - 14	14 - 15	15 - 16	16 - 17
	Original Euclidean Distance Transform Calculations	01_g	547632	77902.9	445	246	794	98.1145	4.31142	1.02952	0.0101922		250	142	93	50	65	42	53	20	21	18	11	10	3	2	4	2	4	2	1	1		142.443	86.6955	375.7	13.1077	152.652	72.5272	89.1646	6.37555	116.062	34.2508	147.676	89.3673	144.112	86.874	229.087	20.1726
		02_g	609722	83337.4	505	315	919	90.6827	4.31486	1.02913	0.0110275		273	187	93	58	61	54	58	38	38	25	21	3	5	1	2	2						116.016	366.374	99.2059	139.196	24.2009	145.615	73.643	59.7852	5.00901	67.497	285.313	12.1098	103.323	130.774	83.8946	42.1414
		03_g	472735	63003.4	292	186	533	118.205	4.40864	1.02465	0.00845986		116	110	67	47	57	27	41	38	13	6	3	1	2	3	2							50.7091	175.134	97.8273	186.095	61.6033	167.23	258.397	30.2464	32.4105	107.448	9.10111	183.74	218.967	494.584	309.044
		04_g	526916	69042.2	357	206	640	107.878	4.4177	1.02453	0.00926969		118	154	86	51	74	45	45	25	8	10	16	5	1	1		1						177.231	90.741	49.2102	151.379	47.2657	336.2	106.675	158.553	174.162	93.267	43.599	83.1322	104.108	238.953		80.7095
		05_g	535051	67852.1	365	213	658	103.119	4.54578	1.02876	0.00969756		151	161	86	40	54	21	40	39	17	13	11	9	5	2	1	2	2			4		128.328	131.514	157.982	153.552	20.0963	122.506	19.8167	109.976	57.018	145.7	34.0395	80.8165	41.5347	148.492	8.10617	109.362
		06_g	559765	70935.8	400	224	714	99.3498	4.71631	1.03095	0.0100654		125	176	98	52	51	57	55	26	11	23	7	14	10	6					1	2		17.9136	76.286	16.3701	204.092	134.758	106.906	7.64057	32.2204	25.724	12.1098	3.176	147.034	177.878	116.195
		07_g	532784	76375.3	437	310	814	93.8271	4.1374	1.02715	0.0106579		189	212	106	50	96	46	32	22	17	17	15	1	2		2	1	5	1				41.1612	65.785	106.893	22.964	17.194	160.906	17.5161	132.652	61.2654	14.3279	10.0832	62.7181	76.7362		135.095	141.382
		08_g	555558	81233	487	314	893	90.9664	3.99662	1.02479	0.0109931		215	243	149	59	58	42	40	15	21	19	9	12	2	4	3	1			1			33.8464	54.3935	109.2	67.388	177.297	77.211	175.235	144.263	101.138	7.17761	123.153	82.0031	239.047	236.569	76.6702	71.8534
		09_g	541943	78700.8	472	325	873	90.1499	3.94518	1.02624	0.0110926		199	240	126	65	75	61	36	14	24	9	14	5	3	1		1						358.408	2.82843	162.495	239.695	137.538	111.383	178.574	125.691	28.367	86.2368	32.6125	31.2938	48.9671	37.5409		39.5596
		10_g	536598	77499.5	441	310	818	94.7427	3.95622	1.02462	0.0105549		158	256	113	72	41	63	43	40	7	12	9	3	1									107.229	151.442	25.3485	167.41	48.1202	101.028	113.803	214.74	57.9301	137.947	59.8061	50.3992	93.851
		11_g	625693	83349.3	543	358	996	83.684	4.55315	1.03137	0.0119497		176	276	132	89	73	46	45	56	40	28	5	7	6	7	4		1	1		4		110.031	38.8347	117.508	55.0316	93.6621	48.2442	28.403	71.8294	130.619	95.3217	37.5098	152.104	168.539	250.274	143.84
		12_g	676424	91552.2	606	430	1128	81.1633	4.3371	1.02455	0.0123208		174	376	157	65	78	59	81	45	23	33	16	9	1	2	3	2	1		1	2		98.0468	58.3148	155.316	73.8936	169.842	74.7301	8.50891	7	210.224	71.2415	53.366	156.981	258.455	10.511	134.563	53.1355
		13_g	556981	80040.6	525	305	942	84.9687	4.12561	1.03416	0.011769		123	322	158	76	78	61	47	27	8	15	17	3		1	1	1			1	3		119.387	58.4557	63.9174	190.053	52.677	269.607	108.324	47.4526	87.1623	112.734	130.271	253.227		39.199	104.091	180.174
		14_g	578169	80984.2	582	286	1025	79.009	4.43122	1.032	0.0126568		152	288	177	77	115	42	48	37	34	19	13	2	6	4	1	1	1	2		6		43.5543	30.5878	47.4108	680.447	148.923	27.6182	70.4073	124.179	428.555	105.327	4.36606	5.35653	290.111	92.3493	61.5973	182.461
		15_g	599188	78837.2	490	310	896	87.9879	4.46961	1.02729	0.0113652		136	277	133	54	92	43	56	32	14	20	8	6	5	5		2	3	3	1	6		102.403	352.064	170.493	23.6793	302.183	142.191	91.0829	25.1318	6.14435	16.1202	85.3049	21.5994	23.5676	253.781		51.4702
	Modified Euclidean Distance Transform Calculations	01_g	547632	77901.7	446	246	795	97.9896	4.16354	1.02936	0.0102052	45	238	127	82	49	62	44	50	23	18	17	11	10	3	2	4	2	4	2	1	1	270.76	142.443	86.6955	375.7	13.1077	152.652	72.5272	89.1646	6.37555	115.213	34.2508	147.108	89.3673	144.112	86.874	229.087	20.1726
		02_g	609722	83337.2	505	315	919	90.6824	4.17176	1.02905	0.0110275	41	275	160	82	58	59	54	57	37	37	26	20	3	5	1	2	2					147.135	116.016	366.374	99.2059	139.196	24.2009	145.615	73.643	59.7852	5.00901	67.497	285.313	12.1098	103.323	130.774	83.8946	42.1414
		03_g	472735	63002.8	292	186	533	118.204	4.28281	1.02466	0.00845994	16	121	99	67	44	55	23	43	36	12	6	3	1	2	3	2						142.935	50.7091	175.134	97.8273	186.095	61.6033	167.23	258.397	30.2464	32.4105	107.448	9.10111	183.74	218.967	494.584	309.044
		04_g	526916	69041.5	358	206	641	107.709	4.29995	1.02448	0.00928428	2	134	151	79	50	70	46	42	26	7	11	16	4	1	1		1					116.871	177.231	90.741	49.2102	151.379	47.2657	336.2	106.675	158.553	174.162	93.267	43.599	83.1322	104.108	238.953		80.7095
		05_g	535051	67855	365	213	658	103.123	4.41468	1.02877	0.00969715	14	166	143	82	41	48	19	42	38	16	13	11	9	5	2	1	2	2			4	210.941	128.328	131.514	157.982	153.552	20.0963	122.506	19.8167	109.976	57.018	145.7	34.0395	80.8165	41.5347	148.492	8.10617	109.362
		06_g	559765	70936.4	400	224	714	99.3508	4.59983	1.03095	0.0100653	7	146	165	91	47	52	58	48	27	11	22	7	14	10	6					1	2	189.314	17.9136	76.286	16.3701	204.092	134.758	106.906	7.64057	32.2204	25.724	12.1098	3.176	147.034	177.878	116.195
		07_g	532784	76374.9	437	310	814	93.8267	4.0038	1.02715	0.010658	20	203	193	96	53	93	45	29	23	16	16	15	1	2		2	1	5	1			83.1179	41.1612	65.785	106.893	22.964	17.194	160.906	17.5161	132.652	61.2654	14.3279	10.0832	62.7181	76.7362		135.095	141.382
		08_g	555558	81232.2	487	314	893	90.9655	3.85765	1.02481	0.0109932	18	236	225	139	52	58	39	40	15	21	19	8	12	2	4	3	1			1		274.652	33.8464	54.3935	109.2	67.388	177.297	77.211	175.235	144.263	101.138	7.17761	123.153	82.0031	239.047	236.569	76.6702	71.8534
		09_g	541943	78700.3	472	325	873	90.1492	3.81013	1.02628	0.0110927	13	234	211	113	63	76	56	36	14	26	7	14	5	3	1		1					132.343	358.408	2.82843	162.007	239.695	137.538	111.383	178.574	125.691	28.367	86.2368	32.6125	31.2938	48.9671	37.5409		39.5596
		10_g	536598	77500.1	441	310	818	94.7434	3.82895	1.02455	0.0105548	4	199	231	104	65	41	60	43	39	8	12	8	3	1								35.1083	107.229	151.442	25.3485	167.41	48.1202	101.028	113.803	214.74	57.9301	137.947	59.8061	50.3992	93.851
		11_g	625693	83350.3	543	358	996	83.685	4.43295	1.03145	0.0119496	6	214	251	122	85	69	48	45	55	39	27	5	7	6	7	4		1	1		4	109.868	110.031	38.8347	117.508	55.0316	93.6621	48.2442	28.403	71.8294	130.619	95.3217	37.5098	152.104	168.539	250.274	143.84
		12_g	676424	91553.8	606	430	1128	81.1647	4.21525	1.02465	0.0123206	1	243	324	149	66	70	57	82	43	23	34	15	9	1	2	3	3			1	2	12.5342	98.0468	58.3148	155.316	73.8936	169.842	74.0628	8.50891	7	210.224	71.2415	53.366	156.981	258.455	10.511	134.563	53.1355
		13_g	556981	80039	525	305	942	84.9671	4.00649	1.03425	0.0117693	2	159	305	148	72	74	63	44	25	8	16	15	4		1	1	1			1	3	40.3453	119.387	58.4557	63.9174	190.053	52.677	269.607	108.324	47.4526	87.1623	112.734	130.271	253.227		39.199	104.091	180.174
		14_g	578169	80983.8	582	286	1025	79.0086	4.31223	1.03198	0.0126569		195	279	156	79	105	37	49	38	34	17	13	2	6	4	1	1	1	2		6		43.5543	30.5878	47.4108	680.447	148.923	27.6182	70.4073	124.179	428.555	105.327	4.36606	5.35653	290.111	92.3493	61.5973	182.461
		15_g	599188	78835.6	490	310	896	87.9861	4.34634	1.02781	0.0113654	2	181	264	102	63	82	42	55	34	12	20	8	6	5	5		2	3	3	1	6	36.1871	102.403	352.064	170.493	23.6793	302.183	142.191	91.0829	25.1318	6.14435	16.1202	85.3049	21.5994	23.5676	253.781		51.4702
[truncated: 25 more columns]

## Sheet: Segment Results
Demo				Demo				02_IC				02_IC
Segment Number	Mean Radius	Length		Segment Number	Mean Radius	Length		Segment Number	Mean Radius	Length		Segment Number	Mean Radius	Length
1.65198	23.8765	1.07425		1.65198	23.8765	1.07425		1.24737	5.99042	1.11239		1.24737	5.99042	1.11239
4.11655	19.0014	1.02898		4.11655	19.0014	1.02898		1.89698	6.8138	1.01574		1.89698	6.8138	1.01574
3.04864	4.4945	1.005		3.04864	4.4945	1.005		1.68316	55.3837	1.10657		1.68316	55.3837	1.10657
4.26947	12.3562	1.04058		4.26947	12.3562	1.04058		1.42113	14.8952	1.1292		1.42113	14.8952	1.1292
4.74486	22.9108	1.02053		4.74486	22.9108	1.02053		1.9839	33.6527	1.01744		1.9839	33.6527	1.01744
2.29248	23.6009	1.08061		2.29248	23.6009	1.08061		1.58357	23.7141	1.02144		1.58357	23.7141	1.02144
4.14011	12	1		4.14011	12	1		1.38991	20.8481	1.23494		1.38991	20.8481	1.23494
2.49934	18.0327	1.1162		2.49934	18.0327	1.1162		1.84716	26.0792	1.0136		1.84716	26.0792	1.0136
4.29003	7.57343	1.03061		4.29003	7.57343	1.03061		1.88874	46.1318	1.14686		1.88874	46.1318	1.14686
1.85297	25.0274	1.03124		1.85297	25.0274	1.03124		1.71952	6.40514	1.03905		1.71952	6.40514	1.03905
2.40201	4.92023	1.00434		2.40201	4.92023	1.00434		1.19934	3.86316	1.03247		1.19934	3.86316	1.03247
1.60741	6.83663	1.05492		1.60741	6.83663	1.05492		2.08229	5.97658	1.04039		2.08229	5.97658	1.04039
1.70876	10.3339	1.0386		1.70876	10.3339	1.0386		1.86153	14.5345	1.45345		1.86153	14.5345	1.45345
								1.25122	8.29429	1.02096		1.25122	8.29429	1.02096
								1.67693	20.624	1.21108		1.67693	20.624	1.21108
								1.86545	9.56375	1.04349		1.86545	9.56375	1.04349
								1.07723	18.3692	1.01894		1.07723	18.3692	1.01894
								1.78641	10.3958	1.01939		1.78641	10.3958	1.01939
								1.19463	31.802	1.03837		1.19463	31.802	1.03837
								1.55353	34.2216	1.10855		1.55353	34.2216	1.10855
								1.76282	9.52701	1.02732		1.76282	9.52701	1.02732
								1.14571	7.97233	1.01249		1.14571	7.97233	1.01249
								2.08774	17.2243	1.19143		2.08774	17.2243	1.19143
								1.6308	28.6671	1.99733		1.6308	28.6671	1.99733
								1.7131	7.34943	1.00952		1.7131	7.34943	1.00952
								2.03038	8.8604	1.00974		2.03038	8.8604	1.00974
								1.56361	30.2322	1.42675		1.56361	30.2322	1.42675
								1.7812	60.4369	1.62868		1.7812	60.4369	1.62868
								2.74169	31.1857	1.0118		2.74169	31.1857	1.0118
								1.27839	6.07384	1.02667		1.27839	6.07384	1.02667
								1.62645	7.59172	1.01449		1.62645	7.59172	1.01449
								1.68929	36.2575	3.00069		1.68929	36.2575	3.00069
								0.785692	3.25653	1.02981		0.785692	3.25653	1.02981
								1.57887	16.339	1.2316		1.57887	16.339	1.2316
								1.8521	38.2116	1.04192		1.8521	38.2116	1.04192
								1.46228	9.80037	1.25481		1.46228	9.80037	1.25481
								1.40403	9.47788	1.32717		1.40403	9.47788	1.32717
								1.29044	1.41421	1		1.29044	1.41421	1
								1.25822	17.2838	1.23142		1.25822	17.2838	1.23142
								1.28695	32.9016	1.55794		1.28695	32.9016	1.55794
								2.36581	43.4975	1.12273		2.36581	43.4975	1.12273
								1.42179	20.7241	1.11737		1.42179	20.7241	1.11737
								1.51112	23.1109	1.07638		1.51112	23.1109	1.07638
								1.87793	6.0185	1.00308		1.87793	6.0185	1.00308
								1.15954	8.56151	1.03068		1.15954	8.56151	1.03068
								1.95457	11.8093	1.06916		1.95457	11.8093	1.06916
								1.36192	12.7769	1.21823		1.36192	12.7769	1.21823
								1.22539	3.67571	1.01946		1.22539	3.67571	1.01946
								1.51202	21.0322	1.09047		1.51202	21.0322	1.09047
								1.83646	47.1359	1.02349		1.83646	47.1359	1.02349
								1.05424	14.2752	1.01966		1.05424	14.2752	1.01966
								1.60285	21.0109	1.07642		1.60285	21.0109	1.07642
								1.35472	21.7681	1.26524		1.35472	21.7681	1.26524
								1.66778	26.5493	1.28632		1.66778	26.5493	1.28632
								1.54022	22.1485	1.00571		1.54022	22.1485	1.00571
								1.87062	5.42126	1.0067		1.87062	5.42126	1.0067
								1.52656	56.4293	1.5479		1.52656	56.4293	1.5479
								1.87698	5.92423	1.03128		1.87698	5.92423	1.03128
								1.90889	14.862	1.21348		1.90889	14.862	1.21348
								1.37518	10.2049	1.13387		1.37518	10.2049	1.13387
								1.408	19.9691	1.22901		1.408	19.9691	1.22901
								1.7837	8.82279	1.05452		1.7837	8.82279	1.05452
								1.47732	29.2684	1.11181		1.47732	29.2684	1.11181
								1.13839	9.3686	1.04744		1.13839	9.3686	1.04744
								1.59202	53.7056	1.47485		1.59202	53.7056	1.47485
								1.81641	48.5438	1.11543		1.81641	48.5438	1.11543
								2.17054	19.374	1.02826		2.17054	19.374	1.02826
								1.144	7.83219	1.04662		1.144	7.83219	1.04662
								1.65413	24.6658	1.03043		1.65413	24.6658	1.03043
								1.44701	36.7543	1.20782		1.44701	36.7543	1.20782
								1.57038	56.0428	3.49586		1.57038	56.0428	3.49586
								1.64547	24.1961	1.23155		1.64547	24.1961	1.23155
								0.954676	11.9846	1.0471		0.954676	11.9846	1.0471
								1.24252	12.3151	1.01573		1.24252	12.3151	1.01573
								1.36828	31.0299	1.03318		1.36828	31.0299	1.03318
								1.32555	12.6414	1.01867		1.32555	12.6414	1.01867
								1.63287	14.1468	1.07556		1.63287	14.1468	1.07556
								2.08172	88.3687	1.01353		2.08172	88.3687	1.01353
								1.04163	28.052	1.06561		1.04163	28.052	1.06561
								1.45415	6.07269	1.04146		1.45415	6.07269	1.04146
								1.63697	32.0441	1.05532		1.63697	32.0441	1.05532
								1.49451	11.6226	1.11325		1.49451	11.6226	1.11325
								2.03034	84.3653	1.01147		2.03034	84.3653	1.01147
								1.01119	8.85826	1.125		1.01119	8.85826	1.125
								1.41187	8.93081	1.06744		1.41187	8.93081	1.06744
								1.25944	3.83055	1.02376		1.25944	3.83055	1.02376
								1.11677	10.8151	1.01292		1.11677	10.8151	1.01292
								1.57274	25.5673	1.24166		1.57274	25.5673	1.24166
								1.94227	49.0171	1.42634		1.94227	49.0171	1.42634
								1.19402	15.489	1.25632		1.19402	15.489	1.25632
								1.15818	13.1475	1.11515		1.15818	13.1475	1.11515
								1.52089	23.7403	1.26178		1.52089	23.7403	1.26178
								1.66898	36.6892	1.24675		1.66898	36.6892	1.24675
								1.30583	60.1566	1.00583		1.30583	60.1566	1.00583
								1.64804	7.06109	1.00873		1.64804	7.06109	1.00873
								0.865685	4.59458	1.08295		0.865685	4.59458	1.08295
								1.10948	2.28078	1.01999		1.10948	2.28078	1.01999
								1.27035	19.3221	1.26312		1.27035	19.3221	1.26312
								0.899968	3.82135	1.0213		0.899968	3.82135	1.0213
								1.6323	8.94924	1.04033		1.6323	8.94924	1.04033
								1.14395	17.3584	1.15723		1.14395	17.3584	1.15723
								1.25602	43.4371	1.08221		1.25602	43.4371	1.08221
								1.57613	3.95001	1.09554		1.57613	3.95001	1.09554
								1.90525	5.36591	1.05234		1.90525	5.36591	1.05234
								1.93628	26.079	1.26951		1.93628	26.079	1.26951
								1.27399	53.4851	1.02066		1.27399	53.4851	1.02066
								1.56265	10.6151	1.38197		1.56265	10.6151	1.38197
								1.26348	5.97909	1.11029		1.26348	5.97909	1.11029
								1.51412	25.1585	1.07472		1.51412	25.1585	1.07472
								2.23529	53.6549	1.35802		2.23529	53.6549	1.35802
								1.76717	25.1317	1.11394		1.76717	25.1317	1.11394
								1.60821	5.59711	1.03936		1.60821	5.59711	1.03936
								1.41664	14.9417	1.00967		1.41664	14.9417	1.00967
								0.826505	6.4937	1.02674		0.826505	6.4937	1.02674
								1.38228	5.63905	1.12781		1.38228	5.63905	1.12781
								1.41312	2.54951	1.04083		1.41312	2.54951	1.04083
								2.01972	24.7577	1.02273		2.01972	24.7577	1.02273
								1.38144	10.64	1.12156		1.38144	10.64	1.12156
								1.80843	15.7357	1.27216		1.80843	15.7357	1.27216
								1.97318	9.73937	1.00993		1.97318	9.73937	1.00993
								1.4747	19.9977	1.04104		1.4747	19.9977	1.04104
								1.50287	10.9525	1.01256		1.50287	10.9525	1.01256
								2.09869	10.7338	1.13778		2.09869	10.7338	1.13778
								2.05168	7.51877	1.06331		2.05168	7.51877	1.06331
								1.46983	53.182	1.29674		1.46983	53.182	1.29674
								1.52291	5.29546	1.01911		1.52291	5.29546	1.01911
								1.78927	29.9142	1.32203		1.78927	29.9142	1.32203
								1.76748	19.3005	1.06896		1.76748	19.3005	1.06896
								1.45336	14.2269	1.05457		1.45336	14.2269	1.05457
								2.23859	19.5871	1.01966		2.23859	19.5871	1.01966
								1.77515	47.8173	1.09014		1.77515	47.8173	1.09014
								2.19818	8.53747	1.02042		2.19818	8.53747	1.02042
								1.09016	30.724	1.00965		1.09016	30.724	1.00965
								1.33768	21.7887	1.03638		1.33768	21.7887	1.03638
								1.95126	56.0989	1.00871		1.95126	56.0989	1.00871
								1.49411	19.2555	1.08665		1.49411	19.2555	1.08665
								2.26336	7.64424	1.0215		2.26336	7.64424	1.0215
								2.70025	18.1036	1.20423		2.70025	18.1036	1.20423
								1.24336	7.5712	1.00283		1.24336	7.5712	1.00283
								1.73156	4.55679	1.01893		1.73156	4.55679	1.01893
								1.39782	19.0148	1.24304		1.39782	19.0148	1.24304
								1.47893	24.3649	1.30422		1.47893	24.3649	1.30422
								1.14287	32.3052	1.15523		1.14287	32.3052	1.15523
								1.60771	13.8357	1.04888		1.60771	13.8357	1.04888
								1.86321	11.2883	1.55057		1.86321	11.2883	1.55057
								2.19798	10.7244	1.08889		2.19798	10.7244	1.08889
								2.24627	53.5723	1.74271		2.24627	53.5723	1.74271
								1.45567	7.09802	1.08244		1.45567	7.09802	1.08244
								1.86106	21.3687	1.03532		1.86106	21.3687	1.03532
								2.13278	24.9589	1.04176		2.13278	24.9589	1.04176
								1.92513	24.8186	1.23477		1.92513	24.8186	1.23477
								2.17459	16.1321	1.06372		2.17459	16.1321	1.06372
								1.35625	3.25653	1.02981		1.35625	3.25653	1.02981
								1.35625	3.51178	1.05884		1.35625	3.51178	1.05884
								1.08771	7.07808	1.05514		1.08771	7.07808	1.05514
								1.41786	15.6059	1.11471		1.41786	15.6059	1.11471
								1.95484	10.0502	1.00003		1.95484	10.0502	1.00003
								1.65195	10.8526	1.00332		1.65195	10.8526	1.00332
								2.07921	11.5824	1.01196		2.07921	11.5824	1.01196
								1.93745	20.6915	1.03717		1.93745	20.6915	1.03717
								1.86359	23.9652	1.13606		1.86359	23.9652	1.13606
								1.80451	6.83846	1.0552		1.80451	6.83846	1.0552
								2.19232	13.2073	1.01296		2.19232	13.2073	1.01296
								1.88526	5.19615	1		1.88526	5.19615	1
								2.16545	12.4937	1.37136		2.16545	12.4937	1.37136
								2.59714	33.0022	1.06904		2.59714	33.0022	1.06904
								1.22664	7.45083	1.01393		1.22664	7.45083	1.01393
								1.66125	10.9804	1.03295		1.66125	10.9804	1.03295
								1.87974	7.68459	1.00045		1.87974	7.68459	1.00045
								1.33264	20.1593	1.02608		1.33264	20.1593	1.02608
								1.70661	10.3929	1.07195		1.70661	10.3929	1.07195
								1.18566	1.41421	1		1.18566	1.41421	1
								1.26116	19.5079	1.278		1.26116	19.5079	1.278
								2.16438	8.66538	1.00733		2.16438	8.66538	1.00733
								1.78865	5.56486	1.016		1.78865	5.56486	1.016
								1.7024	8.8098	1.02412		1.7024	8.8098	1.02412
								1.79368	23.2165	1.14241		1.79368	23.2165	1.14241
								1.92165	18.3169	1.00376		1.92165	18.3169	1.00376
								2.44442	18.0424	1.00081		2.44442	18.0424	1.00081
								2.07287	9.61846	1.01955		2.07287	9.61846	1.01955
								2.06226	33.776	1.03016		2.06226	33.776	1.03016
								2.38836	8.88555	1.06969		2.38836	8.88555	1.06969
								1.80373	33.9258	1.06382		1.80373	33.9258	1.06382
								1.93414	20.4493	1.1123		1.93414	20.4493	1.1123
								2.54874	7.63896	1.0208		2.54874	7.63896	1.0208
								1.61965	14.2572	1.02361		1.61965	14.2572	1.02361
								1.73488	2.28078	1.01999		1.73488	2.28078	1.01999
								1.85435	7.32002	1.07928		1.85435	7.32002	1.07928
								2.45037	4.44761	1.04831		2.45037	4.44761	1.04831
								1.55718	5.48217	1.0009		1.55718	5.48217	1.0009
								2.32131	9.32691	1.00575		2.32131	9.32691	1.00575
								2.50139	5.83095	1.03078		2.50139	5.83095	1.03078
								1.92366	27.0301	1.28424		1.92366	27.0301	1.28424
								1.66052	11.1437	1.04371		1.66052	11.1437	1.04371
								2.15426	6.82677	1.02917		2.15426	6.82677	1.02917
								1.4196	3.14626	1.40705		1.4196	3.14626	1.40705
								1.40318	11.6503	1.02575		1.40318	11.6503	1.02575
								2.05872	8.48084	1.08586		2.05872	8.48084	1.08586
								2.63097	27.7458	1.45228		2.63097	27.7458	1.45228
								2.18831	32.5464	1.10918		2.18831	32.5464	1.10918
								1.94254	14.5954	1.01691		1.94254	14.5954	1.01691
								1.41901	10.5595	1.06127		1.41901	10.5595	1.06127
								1.81858	11.4846	1.02313		1.81858	11.4846	1.02313
								1.58921	11.902	1.11473		1.58921	11.902	1.11473
								2.23957	28.6185	1.00493		2.23957	28.6185	1.00493
								1.77368	19.1121	1.08549		1.77368	19.1121	1.08549
								2.39079	12.4744	1.08167		2.39079	12.4744	1.08167
								2.24221	9.36065	1.00938		2.24221	9.36065	1.00938
								1.60926	10.9229	1.15138		1.60926	10.9229	1.15138
								2.05549	20.7825	1.12052		2.05549	20.7825	1.12052
								2.33944	1.41421	1		2.33944	1.41421	1
								3.27698	10.9942	1.02521		3.27698	10.9942	1.02521
								1.96694	5.11814	1.00375		1.96694	5.11814	1.00375
								3.42072	13.6862	1.02582		3.42072	13.6862	1.02582
								1.70419	12.359	1.02636		1.70419	12.359	1.02636
								1.50173	68.5048	1.10205		1.50173	68.5048	1.10205
								2.59806	20.987	1.01326		2.59806	20.987	1.01326
								2.28344	3.91812	1.04716		2.28344	3.91812	1.04716
								1.09787	7.07981	1.09244		1.09787	7.07981	1.09244
								2.77008	5.5033	1.02194		2.77008	5.5033	1.02194
								1.92034	22.0369	1.42844		1.92034	22.0369	1.42844
								1.36313	6.54167	1.02164		1.36313	6.54167	1.02164
								1.46112	45.8466	1.15743		1.46112	45.8466	1.15743
								1.32065	15.7569	1.07212		1.32065	15.7569	1.07212
								2.33918	23.7735	1.62893		2.33918	23.7735	1.62893
								1.62659	35.4057	2.02401		1.62659	35.4057	2.02401
								1.95698	20.0799	1.14977		1.95698	20.0799	1.14977
								2.17061	7.99493	1.01536		2.17061	7.99493	1.01536
								1.53012	3.73375	1.03556		1.53012	3.73375	1.03556
								1.7608	17.6599	1.22156		1.7608	17.6599	1.22156
								1.81134	43.4478	1.12937		1.81134	43.4478	1.12937
								2.40739	23.6172	1.01727		2.40739	23.6172	1.01727
								1.83883	9.29094	1.03233		1.83883	9.29094	1.03233
								1.62669	7.02664	1.03602		1.62669	7.02664	1.03602
								2.60281	4.67491	1.02015		2.60281	4.67491	1.02015
								1.60278	47.2352	1.19708		1.60278	47.2352	1.19708
								2.73569	2.54951	1.04083		2.73569	2.54951	1.04083
								1.79106	13.159	1.06039		1.79106	13.159	1.06039
								1.56425	10.3446	1.03968		1.56425	10.3446	1.03968
								2.81939	29.1562	1.0188		2.81939	29.1562	1.0188
								2.26438	4.77228	1.06711		2.26438	4.77228	1.06711
								1.38469	6.0879	1.0762		1.38469	6.0879	1.0762
								2.25091	8.80229	1.05967		2.25091	8.80229	1.05967
								1.75407	16.2991	1.01671		1.75407	16.2991	1.01671
								2.75735	11.5855	1.02005		2.75735	11.5855	1.02005
								3.07693	15.7175	1.04321		3.07693	15.7175	1.04321
								2.05205	13.2463	1.00709		2.05205	13.2463	1.00709
								2.65634	20.6515	1.03909		2.65634	20.6515	1.03909
								2.55627	6.58169	1.01558		2.55627	6.58169	1.01558
								2.32814	10.3776	1.04299		2.32814	10.3776	1.04299
								1.05953	6.30001	1.23553		1.05953	6.30001	1.23553
								1.5461	15.9778	1.21127		1.5461	15.9778	1.21127
								1.94411	6.04315	1.02148		1.94411	6.04315	1.02148
								1.57313	2.54951	1.04083		1.57313	2.54951	1.04083
								2.30732	3.51178	1.05884		2.30732	3.51178	1.05884
								2.22363	22.3153	1.04273		2.22363	22.3153	1.04273
								3.13935	34.9509	1.10858		3.13935	34.9509	1.10858
								2.96831	35.5088	1.03414		2.96831	35.5088	1.03414
								2.52447	18.0001	1.06437		2.52447	18.0001	1.06437
								1.96584	4.36949	1.00243		1.96584	4.36949	1.00243
								2.92689	27.8473	1.00682		2.92689	27.8473	1.00682
								2.35341	1.41421	1		2.35341	1.41421	1
								2.64755	6.43865	1.08833		2.64755	6.43865	1.08833
								1.07984	18.9263	1.13512		1.07984	18.9263	1.13512
								1.48359	1.41421	1		1.48359	1.41421	1
								2.02211	13.7373	1.01273		2.02211	13.7373	1.01273
								1.28161	19.4396	1.10588		1.28161	19.4396	1.10588
								1.98349	53.7876	1.02513		1.98349	53.7876	1.02513
								3.48371	26.4143	1.68755		3.48371	26.4143	1.68755
								1.3684	11.128	1.00748		1.3684	11.128	1.00748
								1.93083	7.13053	1.06296		1.93083	7.13053	1.06296
								1.5992	9.73534	1.00412		1.5992	9.73534	1.00412
								1.45605	5.67891	1.0039		1.45605	5.67891	1.0039
								1.37775	26.632	1.07217		1.37775	26.632	1.07217
								1.87441	7.21084	1.06318		1.87441	7.21084	1.06318
								2.17349	28.7766	1.18875		2.17349	28.7766	1.18875
								2.02641	49.7848	3.57434		2.02641	49.7848	3.57434
								1.79741	18.3154	1.0926		1.79741	18.3154	1.0926
								1.77872	13.847	1.0321		1.77872	13.847	1.0321
								2.08479	17.0002	1.05229		2.08479	17.0002	1.05229
								2.67054	10.7002	1.02023		2.67054	10.7002	1.02023
								2.02542	26.3673	1.30538		2.02542	26.3673	1.30538
								2.26495	21.4212	1.02006		2.26495	21.4212	1.02006
								2.71624	3.31321	1.04773		2.71624	3.31321	1.04773
								2.14353	4.2098	1.02103		2.14353	4.2098	1.02103
								4.25647	42.5666	1.01292		4.25647	42.5666	1.01292
								1.39323	22.3769	2.30801		1.39323	22.3769	2.30801
								3.23368	2.5184	1.02813		3.23368	2.5184	1.02813
								1.23274	14.4388	1.02098		1.23274	14.4388	1.02098
								3.46871	1.73205	1		3.46871	1.73205	1
								1.51949	8.56228	1.03833		1.51949	8.56228	1.03833
								1.92937	2.28078	1.01999		1.92937	2.28078	1.01999
								1.82127	30.3724	1.35022		1.82127	30.3724	1.35022
								2.11177	21.1138	1.02417		2.11177	21.1138	1.02417
								1.76736	77.1791	1.65833		1.76736	77.1791	1.65833
								1.69621	28.8758	1.04675		1.69621	28.8758	1.04675
								1.35406	23.8231	1.09079		1.35406	23.8231	1.09079
								2.10843	10.9141	1.06511		2.10843	10.9141	1.06511
								2.8858	11.1776	1.01197		2.8858	11.1776	1.01197
								1.90499	9.67019	1.01933		1.90499	9.67019	1.01933
								1.38901	11.248	1.28182		1.38901	11.248	1.28182
								2.29289	22.3882	1.0187		2.29289	22.3882	1.0187
								2.05816	5.62517	1.04457		2.05816	5.62517	1.04457
								1.92475	8.51511	1.03261		1.92475	8.51511	1.03261
								3.91504	11.9946	1.02477		3.91504	11.9946	1.02477
								2.86466	5.24459	1.02855		2.86466	5.24459	1.02855
								1.2992	7.97779	1.05668		1.2992	7.97779	1.05668
								2.0105	21.8598	1.13644		2.0105	21.8598	1.13644
								2.05205	2.5184	1.02813		2.05205	2.5184	1.02813
								2.21106	8.72202	1.05001		2.21106	8.72202	1.05001
								1.70541	17.1624	1.12194		1.70541	17.1624	1.12194
								1.45331	15.8983	1.06944		1.45331	15.8983	1.06944
								1.65433	15.118	1.17338		1.65433	15.118	1.17338
								3.23205	3.03692	1.01231		3.23205	3.03692	1.01231
								2.34847	15.9189	1.07816		2.34847	15.9189	1.07816
								3.60583	13.8437	1.00433		3.60583	13.8437	1.00433
								3.99994	34.478	1.01362		3.99994	34.478	1.01362
								2.98029	10.4715	1.21728		2.98029	10.4715	1.21728
								1.48201	10.9392	1.02455		1.48201	10.9392	1.02455
								1.62714	5.92	1.00066		1.62714	5.92	1.00066
								1.46044	10.1031	1.03114		1.46044	10.1031	1.03114
								2.11485	18.552	1.0571		2.11485	18.552	1.0571
								1.39963	5.10527	1.02105		1.39963	5.10527	1.02105
								3.78641	24.2335	1.01414		3.78641	24.2335	1.01414
								2.52926	7.95963	1.01087		2.52926	7.95963	1.01087
								1.92993	47.5706	1.05452		1.92993	47.5706	1.05452
								2.7576	19.6238	1.01472		2.7576	19.6238	1.01472
								1.52784	17.1779	1.01753		1.52784	17.1779	1.01753
								1.54875	1.41421	1		1.54875	1.41421	1
								2.07281	6.07384	1.02667		2.07281	6.07384	1.02667
								1.70736	24.4341	2.14301		1.70736	24.4341	2.14301
								2.88971	4.22204	1.02399		2.88971	4.22204	1.02399
								1.08441	17.6868	1.15131		1.08441	17.6868	1.15131
								1.9751	12.9145	1.00845		1.9751	12.9145	1.00845
								1.29875	2.82843	1.41421		1.29875	2.82843	1.41421
								1.98791	45.7433	2.99034		1.98791	45.7433	2.99034
								2.1614	6.01779	1.00297		2.1614	6.01779	1.00297
								2.15767	4.2098	1.02103		2.15767	4.2098	1.02103
								1.27872	5.11563	1.04422		1.27872	5.11563	1.04422
								2.70885	13.0408	1.06835		2.70885	13.0408	1.06835
								0.923465	6.65688	1.03963		0.923465	6.65688	1.03963
								2.25966	6.18254	1.00294		2.25966	6.18254	1.00294
								1.1821	10.8317	1.09417		1.1821	10.8317	1.09417
								1.63836	37.3012	1.20264		1.63836	37.3012	1.20264
								3.59603	18.7549	1.05338		3.59603	18.7549	1.05338
								2.10384	32.1155	1.03383		2.10384	32.1155	1.03383
								3.51426	12.539	1.02723		3.51426	12.539	1.02723
								1.62555	8.98521	1.04451		1.62555	8.98521	1.04451
								2.95617	16.8961	1.02448		2.95617	16.8961	1.02448
								2.23677	13.8399	1.08072		2.23677	13.8399	1.08072
								1.92199	5.16883	1.01369		1.92199	5.16883	1.01369
								3.39574	11.1063	1.0402		3.39574	11.1063	1.0402
								3.32129	8.61633	1.03728		3.32129	8.61633	1.03728
								1.6256	5.23637	1.02694		1.6256	5.23637	1.02694
								1.78441	30.411	1.17052		1.78441	30.411	1.17052
								1.6252	4.61179	1.03123		1.6252	4.61179	1.03123
								1.93452	18.5082	1.05804		1.93452	18.5082	1.05804
								1.44535	10.0336	1.01876		1.44535	10.0336	1.01876
								1.89311	9.51274	1.11338		1.89311	9.51274	1.11338
								2.78257	11.3374	1.06184		2.78257	11.3374	1.06184
								1.26075	3	1.06066		1.26075	3	1.06066
								1.58422	10.1864	1.03964		1.58422	10.1864	1.03964
								3.4988	22.6499	1.01907		3.4988	22.6499	1.01907
								1.78686	10.9351	1.15266		1.78686	10.9351	1.15266
								1.80283	11.291	1.04385		1.80283	11.291	1.04385
								2.08168	8.5684	1.08819		2.08168	8.5684	1.08819
								4.29009	16.7789	1.00997		4.29009	16.7789	1.00997
								3.34148	29.977	1.05328		3.34148	29.977	1.05328
								1.97271	30.6325	1.13766		1.97271	30.6325	1.13766
								2.13225	8.77159	1.05597		2.13225	8.77159	1.05597
								2.85862	12.6946	1.01314		2.85862	12.6946	1.01314
								1.63385	10.3475	1.03475		1.63385	10.3475	1.03475
								2.68941	12.2261	1.07645		2.68941	12.2261	1.07645
								3.45931	3.14626	1.04875		3.45931	3.14626	1.04875
								2.66266	9.76501	1.11283		2.66266	9.76501	1.11283
								3.65442	6.42999	1.0042		3.65442	6.42999	1.0042
								1.85704	10.114	1.1526		1.85704	10.114	1.1526
								1.52672	3.7674	1.00688		1.52672	3.7674	1.00688
								1.82919	11.1583	1.03602		1.82919	11.1583	1.03602
								1.63697	25.1119	1.12304		1.63697	25.1119	1.12304
								1.46308	11.6063	1.073		1.46308	11.6063	1.073
								1.90331	7.13124	1.00851		1.90331	7.13124	1.00851
								2.40985	20.3393	1.0157		2.40985	20.3393	1.0157
								2.74488	11.106	1.00549		2.74488	11.106	1.00549
								2.88987	10.5878	1.01412		2.88987	10.5878	1.01412
								1.78353	59.6539	1.14783		1.78353	59.6539	1.14783
								1.56582	4.74367	1.03515		1.56582	4.74367	1.03515
								1.35683	33.847	1.35172		1.35683	33.847	1.35172
								1.27193	9.5699	1.31453		1.27193	9.5699	1.31453
								2.21564	12.0738	1.05089		2.21564	12.0738	1.05089
								2.92489	12.4333	1.0019		2.92489	12.4333	1.0019
								2.93411	6.62836	1.01082		2.93411	6.62836	1.01082
								3.09308	24.4774	1.01288		3.09308	24.4774	1.01288
								1.29905	8.78152	1.02083		1.29905	8.78152	1.02083
								1.23754	10.9466	1.15387		1.23754	10.9466	1.15387
								2.2249	4.28731	1.03983		2.2249	4.28731	1.03983
								2.22104	13.6853	1.01722		2.22104	13.6853	1.01722
								1.8743	28.5078	1.01684		1.8743	28.5078	1.01684
								2.28611	4.67491	1.02015		2.28611	4.67491	1.02015
								3.1307	9.54818	1.00647		3.1307	9.54818	1.00647
								1.60025	7.3249	1.02569		1.60025	7.3249	1.02569
								1.60335	5.19615	1		1.60335	5.19615	1
								2.05453	15.3627	1.10298		2.05453	15.3627	1.10298
								1.58854	9.74193	1.0505		1.58854	9.74193	1.0505
								3.53672	19.6083	1.01939		3.53672	19.6083	1.01939
								1.91994	20.2045	1.30966		1.91994	20.2045	1.30966
								3.2004	23.207	1.01284		3.2004	23.207	1.01284
								1.5685	54.5151	1.96586		1.5685	54.5151	1.96586
								1.57613	3.47728	1.04844		1.57613	3.47728	1.04844
								1.51319	23.0522	1.07365		1.51319	23.0522	1.07365
								1.57471	5.39017	1.00093		1.57471	5.39017	1.00093
								2.13897	40.3372	1.17526		2.13897	40.3372	1.17526
								2.78438	9.95831	1.02712		2.78438	9.95831	1.02712
								1.29044	2.49194	1.11443		1.29044	2.49194	1.11443
								1.61724	2.73205	1.11536		1.61724	2.73205	1.11536
								1.67361	8.02549	1.04483		1.67361	8.02549	1.04483
								1.98311	9.63409	1.07045		1.98311	9.63409	1.07045
								2.74338	5.39418	1.00167		2.74338	5.39418	1.00167
								3.21508	7.25158	1.00561		3.21508	7.25158	1.00561
								1.29912	4.75232	1.0132		1.29912	4.75232	1.0132
								1.7788	18.0744	1.06876		1.7788	18.0744	1.06876
								3.56837	6.73529	1.00404		3.56837	6.73529	1.00404
								3.35533	7.39801	1.14154		3.35533	7.39801	1.14154
								2.04855	4.4321	1.01679		2.04855	4.4321	1.01679
								2.97155	29.1831	1.02793		2.97155	29.1831	1.02793
								1.41457	8.7017	1.01155		1.41457	8.7017	1.01155
								2.30903	3.4641	1		2.30903	3.4641	1
								2.75021	8.28961	1.00526		2.75021	8.28961	1.00526
								4.07201	13.0522	1.007		4.07201	13.0522	1.007
								1.30239	4.75232	1.0132		1.30239	4.75232	1.0132
								1.56426	5.87355	1.00731		1.56426	5.87355	1.00731
								1.13777	15.1617	1.08854		1.13777	15.1617	1.08854
								1.81888	13.3418	1.07512		1.81888	13.3418	1.07512
								1.65272	3.51178	1.05884		1.65272	3.51178	1.05884
								2.48034	29.4547	1.02548		2.48034	29.4547	1.02548
								2.13934	19.0577	1.81708		2.13934	19.0577	1.81708
								1.41679	5.27319	1.03416		1.41679	5.27319	1.03416
								2.86685	4.24264	1		2.86685	4.24264	1
								2.36277	3.03692	1.01231		2.36277	3.03692	1.01231
								2.7009	13.1529	1.05647		2.7009	13.1529	1.05647
								2.62804	7.75716	1.03659		2.62804	7.75716	1.03659
								2.25594	8.96259	1.01481		2.25594	8.96259	1.01481
								3.26107	16.2071	1.02298		3.26107	16.2071	1.02298
								1.49274	14.1249	1.05575		1.49274	14.1249	1.05575
								1.46448	10.1659	1.01154		1.46448	10.1659	1.01154
								3.79823	22.7335	1.01974		3.79823	22.7335	1.01974
								1.92857	5.56486	1.016		1.92857	5.56486	1.016
								2.65405	17.9902	1.08288		2.65405	17.9902	1.08288
								2.5191	28.2519	1.07553		2.5191	28.2519	1.07553
								3.92515	16.12	1.00554		3.92515	16.12	1.00554
								2.44245	27.756	1.00948		2.44245	27.756	1.00948
								2.61777	3.67571	1.01946		2.61777	3.67571	1.01946
								2.36296	14.3783	1.15863		2.36296	14.3783	1.15863
								1.3916	21.6909	1.54151		1.3916	21.6909	1.54151
								2.57829	6.0185	1.00308		2.57829	6.0185	1.00308
								1.40714	19.7757	1.07407		1.40714	19.7757	1.07407
								1.61823	34.2825	1.13459		1.61823	34.2825	1.13459
								0.87489	11.249	1.30767		0.87489	11.249	1.30767
								2.36919	3.67571	1.01946		2.36919	3.67571	1.01946
								2.17074	3.91812	1.04716		2.17074	3.91812	1.04716
								1.93113	9.33694	1.00683		1.93113	9.33694	1.00683
								1.28299	13.6615	1.03568		1.28299	13.6615	1.03568
								1.88737	5.39017	1.00093		1.88737	5.39017	1.00093
								1.99475	27.3673	1.24784		1.99475	27.3673	1.24784
								1.5675	13.1973	1.15305		1.5675	13.1973	1.15305
								1.71404	16.3727	1.00387		1.71404	16.3727	1.00387
								1.91456	10.6938	1.08024		1.91456	10.6938	1.08024
								1.37905	5.07425	1.01485		1.37905	5.07425	1.01485
								1.62336	7.07242	1.1473		1.62336	7.07242	1.1473
								2.24195	5.43795	1.0098		2.24195	5.43795	1.0098
								1.37899	4.22204	1.02399		1.37899	4.22204	1.02399
								2.73135	28.1594	1.22317		2.73135	28.1594	1.22317
								2.41319	10.4213	1.02189		2.41319	10.4213	1.02189
								4.50533	2.41421	1.07967		4.50533	2.41421	1.07967
								3.63464	10.1761	1.02273		3.63464	10.1761	1.02273
								3.14375	20.7718	1.12984		3.14375	20.7718	1.12984
								1.66639	2.54951	1.04083		1.66639	2.54951	1.04083
								2.0085	1.73205	1		2.0085	1.73205	1
								1.57915	7.3643	1.00215		1.57915	7.3643	1.00215
								1.63429	9.38023	1.0115		1.63429	9.38023	1.0115
								2.85351	3.30232	1.47684		2.85351	3.30232	1.47684
								1.46351	16.8087	1.12058		1.46351	16.8087	1.12058
								1.92605	1	1		1.92605	1	1
								1.99094	9.38576	1.03022		1.99094	9.38576	1.03022
								3.22374	11.6267	1.00439		3.22374	11.6267	1.00439
								1.69286	47.4484	1.14642		1.69286	47.4484	1.14642
								3.11125	3.82135	1.0213		3.11125	3.82135	1.0213
								2.25966	2.82843	1.1547		2.25966	2.82843	1.1547
								2.33925	23.8382	1.173		2.33925	23.8382	1.173
								1.66829	10.3415	1.14203		1.66829	10.3415	1.14203
								1.58244	12.6478	1.04674		1.58244	12.6478	1.04674
								2.32499	2.5184	1.02813		2.32499	2.5184	1.02813
								1.86378	17.9787	1.28748		1.86378	17.9787	1.28748
								1.33554	5.05607	1.10333		1.33554	5.05607	1.10333
								1.50841	20.5134	1.12244		1.50841	20.5134	1.12244
								1.58943	6.6897	1.08521		1.58943	6.6897	1.08521
								3.1101	33.8557	1.01254		3.1101	33.8557	1.01254
								1.93408	15.7221	1.37892		1.93408	15.7221	1.37892
								1.562	15.1517	1.05567		1.562	15.1517	1.05567
								3.2147	9.9757	1.05153		3.2147	9.9757	1.05153
								2.95018	14.7649	1.09444		2.95018	14.7649	1.09444
								2.77218	2.82843	1		2.77218	2.82843	1
								1.72995	43.1337	1.28829		1.72995	43.1337	1.28829
								1.84477	16.8838	1.03521		1.84477	16.8838	1.03521
								2.12917	7.13126	1.00851		2.12917	7.13126	1.00851
								2.1042	11.0959	1.00458		2.1042	11.0959	1.00458
								2.12188	11.7823	1.01032		2.12188	11.7823	1.01032
								1.77708	14.2962	1.05393		1.77708	14.2962	1.05393
								1.95983	6.87024	1.1145		1.95983	6.87024	1.1145
								1.93788	6.11513	1.06451		1.93788	6.11513	1.06451
								1.78966	14.0234	1.04816		1.78966	14.0234	1.04816
								2.01149	21.8937	1.04732		2.01149	21.8937	1.04732
								1.92045	6.58962	1.02913		1.92045	6.58962	1.02913
								1.87007	10.6548	1.20642		1.87007	10.6548	1.20642
								2.39299	24.7593	1.04071		2.39299	24.7593	1.04071
								1.84859	6.56811	1.02577		1.84859	6.56811	1.02577
								2.15918	30.1362	2.35324		2.15918	30.1362	2.35324
								2.48429	5.23637	1.02694		2.48429	5.23637	1.02694
								1.30887	4.32384	1.04869		1.30887	4.32384	1.04869
								2.02056	7.9037	1.07556		2.02056	7.9037	1.07556
								2.32505	47.993	1.02837		2.32505	47.993	1.02837
								1.31767	7.40446	1.10379		1.31767	7.40446	1.10379
								1.55146	8.90151	1.01442		1.55146	8.90151	1.01442
								2.55341	29.6725	1.03811		2.55341	29.6725	1.03811
								1.41353	7.1694	1.01391		1.41353	7.1694	1.01391
								2.12519	5.9621	1.00778		2.12519	5.9621	1.00778
								1.56992	26.5447	1.05506		1.56992	26.5447	1.05506
								1.52048	3.34001	1.00705		1.52048	3.34001	1.00705
								2.70113	7.89113	1.0943		2.70113	7.89113	1.0943
								1.88924	48.6653	1.12779		1.88924	48.6653	1.12779
								3.0732	5.95143	1.00598		3.0732	5.95143	1.00598
								3.57961	6.39192	1.08043		3.57961	6.39192	1.08043
								2.38693	17.1448	1.22777		2.38693	17.1448	1.22777
								2.15297	7.67768	1.02597		2.15297	7.67768	1.02597
								1.34375	5.07425	1.01485		1.34375	5.07425	1.01485
								2.22808	3.4641	1		2.22808	3.4641	1
								1.59962	1.73205	1		1.59962	1.73205	1
								2.00889	10.4185	1.03668		2.00889	10.4185	1.03668
								2.08064	6.04668	1.00778		2.08064	6.04668	1.00778
								2.00909	9.04755	1.08139		2.00909	9.04755	1.08139
								4.39631	3.14626	1.40705		4.39631	3.14626	1.40705
								1.69315	9.6153	1.18356		1.69315	9.6153	1.18356
								1.69757	13.9876	1.01745		1.69757	13.9876	1.01745
								1.59847	57.6381	1.56639		1.59847	57.6381	1.56639
								1.4707	29.7646	1.02152		1.4707	29.7646	1.02152
								1.48942	37.8116	1.10733		1.48942	37.8116	1.10733
								1.26325	6.72873	1.00306		1.26325	6.72873	1.00306
								1.86571	27.9837	1.41883		1.86571	27.9837	1.41883
								1.68037	40.2325	1.1453		1.68037	40.2325	1.1453
								2.0587	8.45429	1.1101		2.0587	8.45429	1.1101
								2.32253	4.77799	1.04264		2.32253	4.77799	1.04264
								1.61724	2.28078	1.01999		1.61724	2.28078	1.01999
								2.49371	23.1175	1.02066		2.49371	23.1175	1.02066
								3.02942	8.35549	1.03637		3.02942	8.35549	1.03637
								3.03916	25.4564	1.01501		3.03916	25.4564	1.01501
								1.66783	14.7555	1.07903		1.66783	14.7555	1.07903
								1.74193	26.627	1.31501		1.74193	26.627	1.31501
								1.87357	40.3281	1.05184		1.87357	40.3281	1.05184
								2.02794	10.0927	1.00426		2.02794	10.0927	1.00426
								3.28317	12.251	1.01044		3.28317	12.251	1.01044
								2.26103	4.75232	1.0132		2.26103	4.75232	1.0132
								2.66377	10.0289	1.09424		2.66377	10.0289	1.09424
								1.7887	19.6817	1.12513		1.7887	19.6817	1.12513
								2.11183	14.5149	1.2054		2.11183	14.5149	1.2054
								2.41229	13.4745	1.03958		2.41229	13.4745	1.03958
								2.00038	5.55612	1.0144		2.00038	5.55612	1.0144
								1.24093	8.62949	1.09595		1.24093	8.62949	1.09595
								1.40559	10.1316	1.01826		1.40559	10.1316	1.01826
								3.13953	23.1056	1.01228		3.13953	23.1056	1.01228
								1.83141	5.99768	1.01379		1.83141	5.99768	1.01379
								1.67057	27.8357	1.34236		1.67057	27.8357	1.34236
								2.84757	2.82843	1.1547		2.84757	2.82843	1.1547
								2.55509	16.7326	1.05615		2.55509	16.7326	1.05615
								1.38361	7.27216	1.03888		1.38361	7.27216	1.03888
								1.0703	15.2376	1.08289		1.0703	15.2376	1.08289
								4.52747	15.0089	1.02598		4.52747	15.0089	1.02598
								2.20918	9.1645	1.00593		2.20918	9.1645	1.00593
								1.48163	3.25653	1.02981		1.48163	3.25653	1.02981
								2.83809	9.32549	1.00559		2.83809	9.32549	1.00559
								2.30358	4.66159	1.01724		2.30358	4.66159	1.01724
								2.13154	4.60755	1.00545		2.13154	4.60755	1.00545
								1.36066	3.14311	1.0477		1.36066	3.14311	1.0477
								1.30542	24.1441	1.09183		1.30542	24.1441	1.09183
								1.58226	23.6113	1.40355		1.58226	23.6113	1.40355
								1.35805	21.8788	1.02233		1.35805	21.8788	1.02233
								2.36586	11.9736	1.01559		2.36586	11.9736	1.01559
								2.19155	9.19203	1.02134		2.19155	9.19203	1.02134
								1.81944	47.2412	1.12288		1.81944	47.2412	1.12288
								1.63325	2.54951	1.04083		1.63325	2.54951	1.04083
								1.43813	42.6149	1.0786		1.43813	42.6149	1.0786
								2.09641	33.8803	1.05008		2.09641	33.8803	1.05008
								1.89751	18.3284	1.02943		1.89751	18.3284	1.02943
								2.5804	8.87912	1.06892		2.5804	8.87912	1.06892
								3.27164	10.5081	1.00191		3.27164	10.5081	1.00191
								1.29162	19.1357	1.43027		1.29162	19.1357	1.43027
								1.64889	26.3183	1.21012		1.64889	26.3183	1.21012
								1.86802	17.9146	1.10888		1.86802	17.9146	1.10888
								1.2042	4.4321	1.01679		1.2042	4.4321	1.01679
								2.04548	7.45216	1.06459		2.04548	7.45216	1.06459
								1.8347	28.1587	1.10109		1.8347	28.1587	1.10109
								1.16245	1	1		1.16245	1	1
								3.06002	4.22204	1.02399		3.06002	4.22204	1.02399
								3.279	3.14626	1.04875		3.279	3.14626	1.04875
								4.1008	3.95001	1.09554		4.1008	3.95001	1.09554
								1.38485	4.4321	1.01679		1.38485	4.4321	1.01679
								2.81284	5.90268	1.0123		2.81284	5.90268	1.0123
								1.33107	14.6542	1.07162		1.33107	14.6542	1.07162
								1.80718	28.7752	1.06795		1.80718	28.7752	1.06795
								1.13842	4.75232	1.0132		1.13842	4.75232	1.0132
								1.34315	34.1782	1.20387		1.34315	34.1782	1.20387
								2.29378	8.66025	1		2.29378	8.66025	1
								1.46643	9.35248	1.03916		1.46643	9.35248	1.03916
								2.91815	16.4992	1.02127		2.91815	16.4992	1.02127
								3.30904	42.0825	1.01707		3.30904	42.0825	1.01707
								1.3296	20.0037	1.05282		1.3296	20.0037	1.05282
								2.04526	5.49925	1.00402		2.04526	5.49925	1.00402
								1.48749	4.24264	1		1.48749	4.24264	1
								1.33592	13.28	1.04661		1.33592	13.28	1.04661
								1.95314	7.38385	1.00481		1.95314	7.38385	1.00481
								1.84203	19.0728	1.11425		1.84203	19.0728	1.11425
								1.76507	9.8925	1.06674		1.76507	9.8925	1.06674
								2.18017	18.025	1.05846		2.18017	18.025	1.05846
								1.61171	16.9047	1.0607		1.61171	16.9047	1.0607
								1.99326	11.4374	1.16129		1.99326	11.4374	1.16129
								2.71312	6.5276	1.01944		2.71312	6.5276	1.01944
								3.63419	9.2031	1.01017		3.63419	9.2031	1.01017
								3.28317	5.79074	1.02367		3.28317	5.79074	1.02367
								1.91495	6.70458	1.03454		1.91495	6.70458	1.03454
								2.08201	35.6668	1.04993		2.08201	35.6668	1.04993
								0.652369	5.56486	1.016		0.652369	5.56486	1.016
								3.20707	8.69047	1.06972		3.20707	8.69047	1.06972
								1.68105	55.5838	1.31122		1.68105	55.5838	1.31122
								1.35209	15.7241	1.02573		1.35209	15.7241	1.02573
								1.73416	6.12216	1.03483		1.73416	6.12216	1.03483
								1.73213	23.7067	1.01829		1.73213	23.7067	1.01829
								2.147	5.23683	1.14277		2.147	5.23683	1.14277
								1.04432	9.73851	1.43586		1.04432	9.73851	1.43586
								1.0924	13.1573	1.2545		1.0924	13.1573	1.2545
								1.69402	11.7431	1.06756		1.69402	11.7431	1.06756
								1.47926	4.20095	1.01888		1.47926	4.20095	1.01888
								3.22009	9.31828	1.06192		3.22009	9.31828	1.06192
								1.45697	6.23713	1.0118		1.45697	6.23713	1.0118
								1.12897	10.4804	1.27094		1.12897	10.4804	1.27094
								2.38142	38.047	1.0516		2.38142	38.047	1.0516
								1.81442	13.554	1.08173		1.81442	13.554	1.08173
								3.34075	12.7185	1.01183		3.34075	12.7185	1.01183
								2.26049	7.22361	1.00174		2.26049	7.22361	1.00174
								1.9429	4.41942	1.04167		1.9429	4.41942	1.04167
								2.41682	4.22204	1.02399		2.41682	4.22204	1.02399
								2.75841	16.602	1.14023		2.75841	16.602	1.14023
								1.44789	21.2097	1.15365		1.44789	21.2097	1.15365
								2.77691	7.06409	1.00916		2.77691	7.06409	1.00916
								2.71708	14.8117	1.01968		2.71708	14.8117	1.01968
								1.77997	4.81813	1.0514		1.77997	4.81813	1.0514
								3.27098	16.8044	1.02458		3.27098	16.8044	1.02458
								1.67925	1.73205	1		1.67925	1.73205	1
								5.10676	4.67491	1.02015		5.10676	4.67491	1.02015
								4.82156	15.8475	1.01246		4.82156	15.8475	1.01246
								1.86151	27.3743	1.04592		1.86151	27.3743	1.04592
								2.00648	5.52667	1.08387		2.00648	5.52667	1.08387
								2.41707	17.0806	1.04142		2.41707	17.0806	1.04142
								1.47794	7.60885	1.00782		1.47794	7.60885	1.00782
								1.50785	5.96081	1.02227		1.50785	5.96081	1.02227
								1.27715	20.917	1.21373		1.27715	20.917	1.21373
								2.34615	14.6283	1.05025		2.34615	14.6283	1.05025
								1.23812	16.017	1.162		1.23812	16.017	1.162
								1.34193	25.0525	1.22098		1.34193	25.0525	1.22098
								2.12675	5.12443	1.00498		2.12675	5.12443	1.00498
								1.48585	6.22466	1.03744		1.48585	6.22466	1.03744
								2.2442	2.73205	1.11536		2.2442	2.73205	1.11536
								2.35926	17.48	1.01945		2.35926	17.48	1.01945
								2.25271	9.5342	1.01062		2.25271	9.5342	1.01062
								1.64421	23.0509	1.02677		1.64421	23.0509	1.02677
								1.93676	20.4596	1.08436		1.93676	20.4596	1.08436
								1.44138	7.72407	1.05111		1.44138	7.72407	1.05111
								2.22248	13.5432	1.04488		2.22248	13.5432	1.04488
								1.41399	10.6608	1.09957		1.41399	10.6608	1.09957
								1.36659	25.1193	1.34269		1.36659	25.1193	1.34269
								1.73151	9.91171	1.19323		1.73151	9.91171	1.19323
								2.44537	27.5166	1.05212		2.44537	27.5166	1.05212
								2.75702	27.7985	1.0212		2.75702	27.7985	1.0212
								2.09761	7.34198	1.03831		2.09761	7.34198	1.03831
								3.17445	27.213	1.02417		3.17445	27.213	1.02417
								2.81016	16.1245	1.00387		2.81016	16.1245	1.00387
								3.27887	5.5196	1.02496		3.27887	5.5196	1.02496
								1.97425	23.655	1.02751		1.97425	23.655	1.02751
								1.47258	4.59717	1.00318		1.47258	4.59717	1.00318
								2.57578	11.7855	1.00324		2.57578	11.7855	1.00324
								1.82174	11.9871	1.01673		1.82174	11.9871	1.01673
								2.03899	6.02522	1.03332		2.03899	6.02522	1.03332
								1.75208	4.4321	1.01679		1.75208	4.4321	1.01679
								2.69032	11.5812	1.01185		2.69032	11.5812	1.01185
								2.4509	9.58206	1.01004		2.4509	9.58206	1.01004
								1.91979	11.3713	1.01708		1.91979	11.3713	1.01708
								1.31739	17.7477	1.21321		1.31739	17.7477	1.21321
								1.26225	9.94488	1.05415		1.26225	9.94488	1.05415
								1.19884	3.31631	1.10544		1.19884	3.31631	1.10544
								1.44179	5.96734	1.02339		1.44179	5.96734	1.02339
								1.73544	13.8947	1.02156		1.73544	13.8947	1.02156
								1.46385	10.6518	1.04449		1.46385	10.6518	1.04449
								1.66417	6.11518	1.0192		1.66417	6.11518	1.0192
								3.04921	2.82843	1.1547		3.04921	2.82843	1.1547
								1.36452	3.03692	1.01231		1.36452	3.03692	1.01231
								1.96126	5.34696	1.02902		1.96126	5.34696	1.02902
								1.67959	8.97515	1.11323		1.67959	8.97515	1.11323
								2.06067	5.48274	1.00101		2.06067	5.48274	1.00101
								1.3827	5.94518	1.08544		1.3827	5.94518	1.08544
								0.859155	6.84024	1.05547		0.859155	6.84024	1.05547
								3.43246	13.0938	1.01628		3.43246	13.0938	1.01628
								4.67657	3.14626	1.04875		4.67657	3.14626	1.04875
								4.60297	8.94475	1.09277		4.60297	8.94475	1.09277
								1.77589	28.2023	1.61486		1.77589	28.2023	1.61486
								1.63749	51.5097	1.38011		1.63749	51.5097	1.38011
								1.56809	1	1		1.56809	1	1
								1.57735	1.41421	1		1.57735	1.41421	1
								3.49539	2.82843	1		3.49539	2.82843	1
								2.45713	12.6806	1.04946		2.45713	12.6806	1.04946
								2.68371	4.22204	1.02399		2.68371	4.22204	1.02399
								3.54901	4.20095	1.01888		3.54901	4.20095	1.01888
								1.83197	18.348	1.15126		1.83197	18.348	1.15126
								1.12224	11.1166	1.31011		1.12224	11.1166	1.31011
								1.37087	8.34989	1.0278		1.37087	8.34989	1.0278
								2.27403	8.51772	1.08175		2.27403	8.51772	1.08175
								1.79847	9.22547	1.02505		1.79847	9.22547	1.02505
								2.99504	11.6383	1.03683		2.99504	11.6383	1.03683
								1.72305	21.9643	1.90455		1.72305	21.9643	1.90455
								1.69602	23.1626	1.19293		1.69602	23.1626	1.19293
								3.0141	4.24264	1		3.0141	4.24264	1
								3.21988	7.08328	1.09297		3.21988	7.08328	1.09297
								1.57385	61.6354	1.08182		1.57385	61.6354	1.08182
								2.79751	19.8171	1.03164		2.79751	19.8171	1.03164
								1.43294	23.8937	1.20222		1.43294	23.8937	1.20222
								1.66378	9.80877	1.03393		1.66378	9.80877	1.03393
								1.48366	31.6056	1.45323		1.48366	31.6056	1.45323
								1.66995	12.2419	1.39509		1.66995	12.2419	1.39509
								1.6563	4.22204	1.02399		1.6563	4.22204	1.02399
								2.44853	5.43436	1.00914		2.44853	5.43436	1.00914
								1.84654	15.1716	1.05705		1.84654	15.1716	1.05705
								2.53391	3.14626	1.04875		2.53391	3.14626	1.04875
								2.84586	4.75232	1.0132		2.84586	4.75232	1.0132
								2.06655	4.02235	1.1156		2.06655	4.02235	1.1156
								1.67229	11.3717	1.02535		1.67229	11.3717	1.02535
								1.45044	8.1837	1.04781		1.45044	8.1837	1.04781
								1.71518	9.9331	1.02452		1.71518	9.9331	1.02452
								2.61676	8.5267	1.01914		2.61676	8.5267	1.01914
								1.41497	11.41	1.03301		1.41497	11.41	1.03301
								1.93076	8.9511	1.03358		1.93076	8.9511	1.03358
								1.96169	19.6804	1.30623		1.96169	19.6804	1.30623
								2.09478	14.4955	1.00995		2.09478	14.4955	1.00995
								1.37598	19.9388	1.16484		1.37598	19.9388	1.16484
								1.61324	34.7299	1.41197		1.61324	34.7299	1.41197
								2.34228	22.9278	1.04433		2.34228	22.9278	1.04433
								1.58843	9.33715	1.03746		1.58843	9.33715	1.03746
								1.37272	21.2828	1.07085		1.37272	21.2828	1.07085
								1.39781	23.7589	1.31589		1.39781	23.7589	1.31589
								2.28367	20.1735	1.25111		2.28367	20.1735	1.25111
								1.80425	6.50769	1.00416		1.80425	6.50769	1.00416
								1.35655	6.75644	1.00719		1.35655	6.75644	1.00719
								2.81079	20.8533	1.02862		2.81079	20.8533	1.02862
								1.49087	17.1039	1.2217		1.49087	17.1039	1.2217
								2.13551	7.75709	1.02745		2.13551	7.75709	1.02745
								2.12981	21.64	1.46902		2.12981	21.64	1.46902
								1.90342	15.0927	1.40133		1.90342	15.0927	1.40133
								2.71332	12.5303	1.02652		2.71332	12.5303	1.02652
								2.81282	26.2856	1.06253		2.81282	26.2856	1.06253
								1.75436	5.03278	1.02731		1.75436	5.03278	1.02731
								1.58438	32.4995	1.38578		1.58438	32.4995	1.38578
								1.78804	9.04826	1.09726		1.78804	9.04826	1.09726
								2.60799	29.0926	1.02666		2.60799	29.0926	1.02666
								1.7069	29.0559	1.27664		1.7069	29.0559	1.27664
								2.18219	27.0943	1.07946		2.18219	27.0943	1.07946
								1.21578	6.40569	1.03914		1.21578	6.40569	1.03914
								2.3927	11.2856	1.0054		2.3927	11.2856	1.0054
								1.97087	10.4833	1.01823		1.97087	10.4833	1.01823
								1.81556	3.03692	1.01231		1.81556	3.03692	1.01231
								1.42917	15.2039	1.24555		1.42917	15.2039	1.24555
								1.31061	10.3529	1.03529		1.31061	10.3529	1.03529
								1.58994	22.9527	1.2014		1.58994	22.9527	1.2014
								1.70717	11.4099	1.0288		1.70717	11.4099	1.0288
								1.61444	4.20095	1.01888		1.61444	4.20095	1.01888
								2.03976	24.4502	1.03229		2.03976	24.4502	1.03229
								2.59744	30.9937	1.13858		2.59744	30.9937	1.13858
								1.79531	12.9836	1.06366		1.79531	12.9836	1.06366
								2.53326	1.41421	1		2.53326	1.41421	1
								4.28534	13.7709	1.00973		4.28534	13.7709	1.00973
								2.39396	3.14626	1.04875		2.39396	3.14626	1.04875
								1.65414	25.0984	1.01289		1.65414	25.0984	1.01289
								2.93563	4.2098	1.02103		2.93563	4.2098	1.02103
								1.43308	40.6132	1.21301		1.43308	40.6132	1.21301
								2.41358	8.84443	1.00792		2.41358	8.84443	1.00792
								1.64224	23.2628	1.12841		1.64224	23.2628	1.12841
								2.81586	7.59694	1.00624		2.81586	7.59694	1.00624
								1.546	14.0623	1.07853		1.546	14.0623	1.07853
								1.63153	30.625	1.01188		1.63153	30.625	1.01188
								3.83077	11.7686	1.00546		3.83077	11.7686	1.00546
								2.11234	7.86597	1.03285		2.11234	7.86597	1.03285
								1.55151	28.1958	1.14822		1.55151	28.1958	1.14822
								2.84709	7.59205	1.03315		2.84709	7.59205	1.03315
								2.07814	7.51707	1.02294		2.07814	7.51707	1.02294
								1.83107	3.14626	1.04875		1.83107	3.14626	1.04875
								2.57921	14.3002	1.00866		2.57921	14.3002	1.00866
								2.04643	8.40652	1.00477		2.04643	8.40652	1.00477
								3.35132	3.4641	1		3.35132	3.4641	1
								2.44736	4.08562	1.09193		2.44736	4.08562	1.09193
								1.68165	12.8034	1.05962		1.68165	12.8034	1.05962
								2.25573	16.0782	1.01892		2.25573	16.0782	1.01892
								2.83923	5.34418	1.02849		2.83923	5.34418	1.02849
								1.93038	6.63583	1.07647		1.93038	6.63583	1.07647
								1.97085	13.4123	1.08079		1.97085	13.4123	1.08079
								3.80924	7.98965	1.08725		3.80924	7.98965	1.08725
								1.80207	43.5369	1.06569		1.80207	43.5369	1.06569
								2.46389	9.07785	1.00865		2.46389	9.07785	1.00865
								2.62111	3.83055	1.02376		2.62111	3.83055	1.02376
								3.61356	8.33369	1.10382		3.61356	8.33369	1.10382
								3.04642	10.0502	1.00003		3.04642	10.0502	1.00003
								1.39016	9.10447	1.05837		1.39016	9.10447	1.05837
								1.38396	10.1727	1.05486		1.38396	10.1727	1.05486
								1.62292	7.72356	1.00552		1.62292	7.72356	1.00552
								1.91494	15.765	1.15595		1.91494	15.765	1.15595
								1.50985	7.59396	1.03341		1.50985	7.59396	1.03341
								3.13413	14.5249	1.08564		3.13413	14.5249	1.08564
								1.76973	1.41421	1		1.76973	1.41421	1
								1.66327	4.78363	1.01987		1.66327	4.78363	1.01987
								1.54641	6.73299	1.03892		1.54641	6.73299	1.03892
								1.2566	8.53599	1.02025		1.2566	8.53599	1.02025
								1.65613	11.0776	1.03751		1.65613	11.0776	1.03751
								1.54152	13.2649	1.02956		1.54152	13.2649	1.02956
								1.63778	21.5865	1.02561		1.63778	21.5865	1.02561
								1.67996	20.4618	1.05383		1.67996	20.4618	1.05383
								1.385	34.665	1.20688		1.385	34.665	1.20688
								1.81058	50.2897	1.04907		1.81058	50.2897	1.04907
								2.01234	8.8604	1.00974		2.01234	8.8604	1.00974
								1.89181	6.50876	1.0165		1.89181	6.50876	1.0165
								2.13211	13.4763	1.03358		2.13211	13.4763	1.03358
								3.20732	13.9945	1.01795		3.20732	13.9945	1.01795
								3.0783	4.4321	1.01679		3.0783	4.4321	1.01679
								1.60034	48.7569	1.68027		1.60034	48.7569	1.68027
								2.73547	29.4867	1.09587		2.73547	29.4867	1.09587
								1.52636	6.4117	1.00134		1.52636	6.4117	1.00134
								1.48913	31.2405	1.75188		1.48913	31.2405	1.75188
								1.6605	31.4575	1.20545		1.6605	31.4575	1.20545
								1.99672	7.46876	1.10121		1.99672	7.46876	1.10121
								2.39977	16.6854	1.00617		2.39977	16.6854	1.00617
								1.22703	10.4332	1.15925		1.22703	10.4332	1.15925
								1.62745	13.9998	1.00513		1.62745	13.9998	1.00513
								1.56638	5.20374	1.02054		1.56638	5.20374	1.02054
								1.74733	30.5857	1.13592		1.74733	30.5857	1.13592
								2.08839	7.82305	1.01847		2.08839	7.82305	1.01847
								2.09722	8.85101	1.07334		2.09722	8.85101	1.07334
								4.61668	6.48895	1.0134		4.61668	6.48895	1.0134
								1.64971	8.36874	1.03012		1.64971	8.36874	1.03012
								2.63952	10.3268	1.00303		2.63952	10.3268	1.00303
								3.95733	3.61537	1.00272		3.95733	3.61537	1.00272
								1.68908	3.83055	1.02376		1.68908	3.83055	1.02376
								1.54642	7.29439	1.09967		1.54642	7.29439	1.09967
								1.72915	28.0622	1.02469		1.72915	28.0622	1.02469
								1.54318	9.57149	1.04433		1.54318	9.57149	1.04433
								1.9013	33.9367	1.06785		1.9013	33.9367	1.06785
								1.30157	5.33431	1.02659		1.30157	5.33431	1.02659
								1.22798	9.9491	1.06058		1.22798	9.9491	1.06058
								3.73033	13.7359	1.02098		3.73033	13.7359	1.02098
								3.39899	11.8238	1.05335		3.39899	11.8238	1.05335
								3.44288	19.8989	1.04155		3.44288	19.8989	1.04155
								1.77911	22.9958	1.1955		1.77911	22.9958	1.1955
								1.52142	58.3041	1.07201		1.52142	58.3041	1.07201
								1.84537	2.73205	1.11536		1.84537	2.73205	1.11536
								3.06136	16.1671	1.06835		3.06136	16.1671	1.06835
								1.43693	24.3799	1.05012		1.43693	24.3799	1.05012
								2.0479	5.65409	1.03229		2.0479	5.65409	1.03229
								2.97682	49.8752	1.03637		2.97682	49.8752	1.03637
								1.53137	55.7433	2.30668		1.53137	55.7433	2.30668
								2.73897	12.2325	1.03384		2.73897	12.2325	1.03384
								3.88877	10.0518	1.01538		3.88877	10.0518	1.01538
								2.39267	4.94011	1.05324		2.39267	4.94011	1.05324
								1.96785	5.33431	1.02659		1.96785	5.33431	1.02659
								0.614277	4.4321	1.01679		0.614277	4.4321	1.01679
								1.05943	3.83055	1.02376		1.05943	3.83055	1.02376
								1.32084	48.3606	1.05281		1.32084	48.3606	1.05281
								1.56906	8.27568	1.0774		1.56906	8.27568	1.0774
								1.2356	12.0511	1.02216		1.2356	12.0511	1.02216
								2.94029	6.22638	1.06782		2.94029	6.22638	1.06782
								1.51055	11.7277	1.01312		1.51055	11.7277	1.01312
								2.1826	10.1692	1.01187		2.1826	10.1692	1.01187
								1.70633	18.1052	1.01053		1.70633	18.1052	1.01053
								1.57746	17.1111	1.02811		1.57746	17.1111	1.02811
								0.785692	2.92252	1.68732		0.785692	2.92252	1.68732
								2.59361	23.1712	1.01907		2.59361	23.1712	1.01907
								3.32623	3.14626	1.40705		3.32623	3.14626	1.40705
								1.59381	6.42529	1.04232		1.59381	6.42529	1.04232
								2.22017	16.3457	2.33511		2.22017	16.3457	2.33511
								1.77249	5.19615	1		1.77249	5.19615	1
								1.54913	13.2461	1.00709		1.54913	13.2461	1.00709
								1.56809	2.5184	1.02813		1.56809	2.5184	1.02813
								4.122	17.1741	1.03376		4.122	17.1741	1.03376
								1.6318	13.8086	1.01798		1.6318	13.8086	1.01798
								1.74834	16.0007	1.03717		1.74834	16.0007	1.03717
								1.94136	9.14016	1.01557		1.94136	9.14016	1.01557
								1.50355	21.173	1.07351		1.50355	21.173	1.07351
								2.45276	20.6006	1.04315		2.45276	20.6006	1.04315
								3.36816	14.0649	1.02307		3.36816	14.0649	1.02307
								2.04366	35.8939	1.0185		2.04366	35.8939	1.0185
								2.16392	14.4528	1.00697		2.16392	14.4528	1.00697
								1.79431	8.06114	1.07722		1.79431	8.06114	1.07722
								3.09762	8.82516	1.00572		3.09762	8.82516	1.00572
								1.75739	4.52229	1.01121		1.75739	4.52229	1.01121
								2.55992	10.2959	1.00003		2.55992	10.2959	1.00003
								1.93526	6.44981	1.00729		1.93526	6.44981	1.00729
								2.05205	2	1		2.05205	2	1
								2.10738	13.5347	1.05688		2.10738	13.5347	1.05688
								2.0606	17.0784	1.11884		2.0606	17.0784	1.11884
								1.94701	7.05923	1.00846		1.94701	7.05923	1.00846
								2.45984	25.2001	1.03747		2.45984	25.2001	1.03747
								1.25619	9.32057	1.06218		1.25619	9.32057	1.06218
								0.917624	7.44893	1.02319		0.917624	7.44893	1.02319
								1.59559	7.48866	1.01908		1.59559	7.48866	1.01908
								2.23469	17.5826	1.04889		2.23469	17.5826	1.04889
								2.12612	9.7385	1.06894		2.12612	9.7385	1.06894
								2.0469	10.1397	1.00894		2.0469	10.1397	1.00894
								2.35005	14.8687	1.02604		2.35005	14.8687	1.02604
								1.26602	6.4117	1.00134		1.26602	6.4117	1.00134
								4.42459	15.7326	1.01133		4.42459	15.7326	1.01133
								1.44758	9.79769	1.05651		1.44758	9.79769	1.05651
								1.80527	11.7086	1.11637		1.80527	11.7086	1.11637
								1.19824	13.2341	1.15627		1.19824	13.2341	1.15627
								3.97793	22.5125	1.08063		3.97793	22.5125	1.08063
								2.05205	1.73205	1		2.05205	1.73205	1
								1.67251	11.6301	1.15723		1.67251	11.6301	1.15723
								2.07885	76.2827	1.32791		2.07885	76.2827	1.32791
								2.69982	9.49069	1.05452		2.69982	9.49069	1.05452
								3.12726	12.8488	1.04217		3.12726	12.8488	1.04217
								4.50989	18.7922	1.01174		4.50989	18.7922	1.01174
								4.6998	9.59385	1.01695		4.6998	9.59385	1.01695
								2.24587	3.03692	1.01231		2.24587	3.03692	1.01231
								1.0962	4.59717	1.00318		1.0962	4.59717	1.00318
								1.60372	4.22204	1.02399		1.60372	4.22204	1.02399
								1.84361	21.1839	1.17327		1.84361	21.1839	1.17327
								2.83237	24.4289	1.03047		2.83237	24.4289	1.03047
								2.02518	19.131	1.01394		2.02518	19.131	1.01394
								2.19496	13.5195	1.03386		2.19496	13.5195	1.03386
								2.77564	11.6654	1.00773		2.77564	11.6654	1.00773
								1.70209	9.72772	1.02539		1.70209	9.72772	1.02539
								1.20973	30.2497	1.23289		1.20973	30.2497	1.23289
								1.72416	6.7082	1.02299		1.72416	6.7082	1.02299
								1.64818	10.9496	1.03005		1.64818	10.9496	1.03005
								1.94193	10.5465	1.01017		1.94193	10.5465	1.01017
								1.86594	8.07854	1.02598		1.86594	8.07854	1.02598
								2.16176	3.83055	1.02376		2.16176	3.83055	1.02376
								4.37768	6.86861	1.01272		4.37768	6.86861	1.01272
								2.36998	24.6165	1.02391		2.36998	24.6165	1.02391
								1.45283	11.3217	1.54069		1.45283	11.3217	1.54069
								1.80985	43.1328	1.20185		1.80985	43.1328	1.20185
								2.59545	4.4321	1.01679		2.59545	4.4321	1.01679
								2.1521	3.03692	1.01231		2.1521	3.03692	1.01231
								2.39843	16.1238	1.0117		2.39843	16.1238	1.0117
								1.7825	8.37353	1.15019		1.7825	8.37353	1.15019
								1.77643	18.4549	1.25569		1.77643	18.4549	1.25569
								2.39134	5.06496	1.01299		2.39134	5.06496	1.01299
								1.60421	7.6241	1.00984		1.60421	7.6241	1.00984
								1.86649	12.0583	1.01549		1.86649	12.0583	1.01549
								1.93998	8.08545	1.11062		1.93998	8.08545	1.11062
								0.671415	2.92252	1.68732		0.671415	2.92252	1.68732
								0.804738	2.5184	1.02813		0.804738	2.5184	1.02813
								2.48636	12.8006	1.14037		2.48636	12.8006	1.14037
								4.41852	5.74208	1.04836		4.41852	5.74208	1.04836
								2.80383	9.36603	1.02806		2.80383	9.36603	1.02806
								2.22209	9.21167	1.02352		2.22209	9.21167	1.02352
								3.1404	3.14626	1.04875		3.1404	3.14626	1.04875
								1.63965	7.03035	1.03657		1.63965	7.03035	1.03657
								2.51232	4.22204	1.02399		2.51232	4.22204	1.02399
								2.47366	14.576	1.00345		2.47366	14.576	1.00345
								3.3578	9.34899	1.03878		3.3578	9.34899	1.03878
								2.44801	8.41259	1.0055		2.44801	8.41259	1.0055
								2.02112	15.5104	1.08594		2.02112	15.5104	1.08594
								1.97907	6.38866	1.03638		1.97907	6.38866	1.03638
								2.24953	14.6027	1.01742		2.24953	14.6027	1.01742
								1.72364	18.7908	1.17214		1.72364	18.7908	1.17214
								1.94158	7.07107	1		1.94158	7.07107	1
								2.06985	6.90167	1.0176		2.06985	6.90167	1.0176
								1.83212	18.805	1.3264		1.83212	18.805	1.3264
								2.4986	16.7686	1.05215		2.4986	16.7686	1.05215
								1.35655	8.99035	1.04511		1.35655	8.99035	1.04511
								1.75544	17.497	1.05703		1.75544	17.497	1.05703
								2.14896	6.296	1.14949		2.14896	6.296	1.14949
								1.66804	12.5123	1.29055		1.66804	12.5123	1.29055
								1.92161	10.6905	1.13319		1.92161	10.6905	1.13319
								1.40517	34.7353	1.28649		1.40517	34.7353	1.28649
								1.18566	1	1		1.18566	1	1
								1.79313	24.221	1.00746		1.79313	24.221	1.00746
								1.2996	21.5921	1.03289		1.2996	21.5921	1.03289
								1.77198	6.71028	1.08855		1.77198	6.71028	1.08855
								1.93918	38.6908	1.2353		1.93918	38.6908	1.2353
								1.56646	4.59717	1.00318		1.56646	4.59717	1.00318
								1.7275	21.532	1.53409		1.7275	21.532	1.53409
								1.62993	6.11743	1.06491		1.62993	6.11743	1.06491
								1.66304	25.3291	1.10023		1.66304	25.3291	1.10023
								2.04398	9.53656	1.04052		2.04398	9.53656	1.04052
								2.06332	10.5824	1.01361		2.06332	10.5824	1.01361
								2.05205	3.03692	1.01231		2.05205	3.03692	1.01231
								1.4834	20.2941	1.06079		1.4834	20.2941	1.06079
								1.60242	65.6845	1.00484		1.60242	65.6845	1.00484
								1.81836	9.0252	1.02852		1.81836	9.0252	1.02852
								2.41705	27.3376	1.05067		2.41705	27.3376	1.05067
								1.71795	22.0279	1.15299		1.71795	22.0279	1.15299
								1.40713	16.5309	1.14074		1.40713	16.5309	1.14074
								1.82503	10.2171	1.02686		1.82503	10.2171	1.02686
								2.21634	5.16291	1.03258		2.21634	5.16291	1.03258
								2.27878	10.8364	1.01492		2.27878	10.8364	1.01492
								1.86561	22.0672	1.0391		1.86561	22.0672	1.0391
								2.23556	22.2425	1.22256		2.23556	22.2425	1.22256
								1.4858	7.04869	1.05076		1.4858	7.04869	1.05076
								1.46471	28.6526	1.22622		1.46471	28.6526	1.22622
								2.01359	30.8527	1.01553		2.01359	30.8527	1.01553
								1.4071	20.9289	1.2463		1.4071	20.9289	1.2463
								2.95048	3.4641	1		2.95048	3.4641	1
								1.48783	9.74759	1.05111		1.48783	9.74759	1.05111
								1.63637	11.7914	1.27896		1.63637	11.7914	1.27896
								2.58934	14.8619	1.02072		2.58934	14.8619	1.02072
								4.14526	9.04871	1.0312		4.14526	9.04871	1.0312
								1.39249	5.43795	1.0098		1.39249	5.43795	1.0098
								1.38181	5.87355	1.00731		1.38181	5.87355	1.00731
								1.60909	21.6793	1.33427		1.60909	21.6793	1.33427
								2.84309	12.36	1.01944		2.84309	12.36	1.01944
								2.07623	8.67105	1.00799		2.07623	8.67105	1.00799
								3.24957	7.22834	1.03262		3.24957	7.22834	1.03262
								3.62353	19.9818	1.02236		3.62353	19.9818	1.02236
								1.57118	32.1795	1.26805		1.57118	32.1795	1.26805
								2.60477	10.9971	1.03452		2.60477	10.9971	1.03452
								2.328	34.0482	1.21446		2.328	34.0482	1.21446
								1.81414	16.3609	1.03269		1.81414	16.3609	1.03269
								2.42158	43.2546	1.18339		2.42158	43.2546	1.18339
								2.66407	3.4641	1		2.66407	3.4641	1
								1.6352	27.6112	1.83667		1.6352	27.6112	1.83667
								1.35672	48.735	1.6466		1.35672	48.735	1.6466
								2.53715	4.75232	1.0132		2.53715	4.75232	1.0132
								2.01283	21.1192	1.22546		2.01283	21.1192	1.22546
								2.71996	20.744	1.01341		2.71996	20.744	1.01341
								1.65497	7.80667	1.01634		1.65497	7.80667	1.01634
								1.6679	12.1663	1.03944		1.6679	12.1663	1.03944
								3.43618	2.73205	1.11536		3.43618	2.73205	1.11536
								3.17921	22.6477	1.06291		3.17921	22.6477	1.06291
								2.26188	8.11764	1.03094		2.26188	8.11764	1.03094
								2.02125	5.19615	1		2.02125	5.19615	1
								1.2632	5.90268	1.0123		1.2632	5.90268	1.0123
								1.74959	3.51178	1.05884		1.74959	3.51178	1.05884
								2.36056	1.41421	1		2.36056	1.41421	1
								2.18499	14.9796	1.18056		2.18499	14.9796	1.18056
								1.43411	12.6013	1.01876		1.43411	12.6013	1.01876
								2.11288	6.39846	1.03797		2.11288	6.39846	1.03797
								1.79537	38.0686	1.45879		1.79537	38.0686	1.45879
								2.07386	6.87406	1.08688		2.07386	6.87406	1.08688
								1.2235	8.79066	1.02189		1.2235	8.79066	1.02189
								3.0343	6.56298	1.00085		3.0343	6.56298	1.00085
								2.7095	6.52446	1.01895		2.7095	6.52446	1.01895
								1.8012	23.1526	1.1679		1.8012	23.1526	1.1679
								2.95439	11.198	1.01381		2.95439	11.198	1.01381
								2.27617	13.1419	1.03572		2.27617	13.1419	1.03572
								3.8599	5.39418	1.00167		3.8599	5.39418	1.00167
								2.09073	2.54951	1.04083		2.09073	2.54951	1.04083
								3.87748	17.1423	1.05106		3.87748	17.1423	1.05106
								2.31135	2.73205	1.11536		2.31135	2.73205	1.11536
								2.05007	5.40705	1.00406		2.05007	5.40705	1.00406
								2.0524	13.3104	1.09043		2.0524	13.3104	1.09043
								3.32029	22.0686	1.07049		3.32029	22.0686	1.07049
								3.33183	3.4641	1		3.33183	3.4641	1
								2.47051	4.75232	1.0132		2.47051	4.75232	1.0132
								3.00225	5.61468	1.04262		3.00225	5.61468	1.04262
								2.77334	18.1054	1.00431		2.77334	18.1054	1.00431
								2.37617	2	1		2.37617	2	1
								2.19117	3.03692	1.01231		2.19117	3.03692	1.01231
								2.24137	7.62633	1.01911		2.24137	7.62633	1.01911
								1.2246	28.5235	1.26428		1.2246	28.5235	1.26428
								1.47644	3.03692	1.01231		1.47644	3.03692	1.01231
								3.70755	15.0096	1.01892		3.70755	15.0096	1.01892
								1.78192	3.03692	1.01231		1.78192	3.03692	1.01231
								1.91371	17.309	1.03257		1.91371	17.309	1.03257
								1.71854	15.8582	1.16592		1.71854	15.8582	1.16592
								1.88921	6.27833	1.07673		1.88921	6.27833	1.07673
								1.71014	11.8891	1.305		1.71014	11.8891	1.305
								1.60341	9.0821	1.04871		1.60341	9.0821	1.04871
								1.69409	4.67491	1.02015		1.69409	4.67491	1.02015
								1.35105	11.7301	1.08445		1.35105	11.7301	1.08445
								3.10601	17.3148	1.01501		3.10601	17.3148	1.01501
								3.06973	13.8195	1.01603		3.06973	13.8195	1.01603
								1.5352	36.9489	2.48545		1.5352	36.9489	2.48545
								2.14007	6.61149	1.02017		2.14007	6.61149	1.02017
								3.53959	7.76099	1.02797		3.53959	7.76099	1.02797
								1.71501	11.6079	1.01034		1.71501	11.6079	1.01034
								1.76051	29.1428	1.2719		1.76051	29.1428	1.2719
								2.48438	4.4321	1.01679		2.48438	4.4321	1.01679
								1.63252	19.9368	1.21332		1.63252	19.9368	1.21332
								3.00474	10.9212	1.00966		3.00474	10.9212	1.00966
								1.77651	20.8816	1.17098		1.77651	20.8816	1.17098
								2.1801	5.39418	1.00167		2.1801	5.39418	1.00167
								1.37241	6	1		1.37241	6	1
								1.39505	21.8273	1.03822		1.39505	21.8273	1.03822
								1.69648	12.2878	1.04601		1.69648	12.2878	1.04601
								1.83602	16.9213	1.06383		1.83602	16.9213	1.06383
								1.72824	12.7684	1.01903		1.72824	12.7684	1.01903
								2.59367	13.2678	1.01759		2.59367	13.2678	1.01759
								1.41265	11.7926	1.06765		1.41265	11.7926	1.06765
								2.93432	30.6873	1.03742		2.93432	30.6873	1.03742
								1.51185	8.73049	1.00811		1.51185	8.73049	1.00811
								2.04199	6.81241	1.06392		2.04199	6.81241	1.06392
								2.26329	4.85061	1.05849		2.26329	4.85061	1.05849
								1.83137	9.40629	1.09346		1.83137	9.40629	1.09346
								2.19463	26.235	1.06049		2.19463	26.235	1.06049
								2.46545	41.9604	1.0374		2.46545	41.9604	1.0374
								2.458	11.2785	1.19552		2.458	11.2785	1.19552
								3.21963	5.80887	1.01119		3.21963	5.80887	1.01119
								1.298	12.8929	1.17208		1.298	12.8929	1.17208
								2.46292	8.46593	1.10217		2.46292	8.46593	1.10217
								1.706	8.14317	1.01004		1.706	8.14317	1.01004
								1.26968	25.1157	1.07584		1.26968	25.1157	1.07584
								1.35024	17.5154	1.20014		1.35024	17.5154	1.20014
								2.36785	7.62623	1.16299		2.36785	7.62623	1.16299
								1.71181	22.2177	1.17754		1.71181	22.2177	1.17754
								2.69517	22.4105	1.19789		2.69517	22.4105	1.19789
								1.44178	24.9103	1.2055		1.44178	24.9103	1.2055
								2.13717	9.64918	1.02281		2.13717	9.64918	1.02281
								2.23772	19.1046	1.03916		2.23772	19.1046	1.03916
								1.75892	3.4641	1		1.75892	3.4641	1
								1.62922	37.3401	1.34303		1.62922	37.3401	1.34303
								1.11315	13.1597	1.41905		1.11315	13.1597	1.41905
								1.49196	9.14419	1.00371		1.49196	9.14419	1.00371
								1.80345	3.87125	1.03464		1.80345	3.87125	1.03464
								2.27635	6.36287	1.03219		2.27635	6.36287	1.03219
								2.089	7.59755	1.00632		2.089	7.59755	1.00632
								0.957107	2.82843	1		0.957107	2.82843	1
								1.77525	63.209	1.01725		1.77525	63.209	1.01725
								1.90078	3.14626	1.04875		1.90078	3.14626	1.04875
								1.86412	19.4595	1.24322		1.86412	19.4595	1.24322
								2.35931	24.372	1.18641		2.35931	24.372	1.18641
								1.60799	25.6865	1.04002		1.60799	25.6865	1.04002
								2.26365	2.73205	1.11536		2.26365	2.73205	1.11536
								1.77918	10.1705	1.07206		1.77918	10.1705	1.07206
								1.20711	4.17586	1.11604		1.20711	4.17586	1.11604
								2.32233	10.4793	1.04273		2.32233	10.4793	1.04273
								1.99738	6.1327	1.06757		1.99738	6.1327	1.06757
								1.72599	34.7556	1.3947		1.72599	34.7556	1.3947
								4.35193	3.34001	1.00705		4.35193	3.34001	1.00705
								2.286	7.37461	1.01298		2.286	7.37461	1.01298
								1.78456	36.6014	1.15513		1.78456	36.6014	1.15513
								1.63012	6.18112	1.0448		1.63012	6.18112	1.0448
								1.51981	4.78363	1.01987		1.51981	4.78363	1.01987
								1.56162	11.5544	1.0728		1.56162	11.5544	1.0728
								1.95441	28.4139	1.13565		1.95441	28.4139	1.13565
								1.99516	10.217	1.01663		1.99516	10.217	1.01663
								1.43619	26.6922	1.12997		1.43619	26.6922	1.12997
								1.24701	13.9974	1.08641		1.24701	13.9974	1.08641
								2.35753	36.9366	1.4681		2.35753	36.9366	1.4681
								2.28901	9.50074	1.03662		2.28901	9.50074	1.03662
								1.76308	33.5162	1.06307		1.76308	33.5162	1.06307
								2.24978	9.90903	1.101		2.24978	9.90903	1.101
								2.30814	15.7975	1.02833		2.30814	15.7975	1.02833
								1.20041	27.9048	1.03851		1.20041	27.9048	1.03851
								1.05397	4.1228	1.10187		1.05397	4.1228	1.10187
								2.28942	1.41421	1		2.28942	1.41421	1
								3.18626	8.25806	1.00888		3.18626	8.25806	1.00888
								2.97948	4.67491	1.02015		2.97948	4.67491	1.02015
								1.93596	15.1105	1.08208		1.93596	15.1105	1.08208
								2.69667	12.0878	1.04814		2.69667	12.0878	1.04814
								2.24523	17.2123	1.03232		2.24523	17.2123	1.03232
								2.48677	4.87228	1.03877		2.48677	4.87228	1.03877
								2.60955	3.14626	1.40705		2.60955	3.14626	1.40705
								1.56743	11.5491	1.02887		1.56743	11.5491	1.02887
								2.71498	5.39596	1.03845		2.71498	5.39596	1.03845
								3.50331	7.11929	1.00682		3.50331	7.11929	1.00682
								1.25425	11.5923	1.11547		1.25425	11.5923	1.11547
								1.52704	5.75642	1.00206		1.52704	5.75642	1.00206
								1.94871	2.82843	1		1.94871	2.82843	1
								1.53813	20.8138	1.27618		1.53813	20.8138	1.27618
								1.00143	14.0071	1.10391		1.00143	14.0071	1.10391
								1.6055	11.2043	1.01439		1.6055	11.2043	1.01439
								2.50323	15.0135	1.0009		2.50323	15.0135	1.0009
								3.12244	6.54475	1.03482		3.12244	6.54475	1.03482
								2.19238	39.1648	1.0271		2.19238	39.1648	1.0271
								1.45524	9.53873	1.08704		1.45524	9.53873	1.08704
								1.88807	9.92582	1.02926		1.88807	9.92582	1.02926
								1.69822	4.4321	1.01679		1.69822	4.4321	1.01679
								1.48101	4.4945	1.005		1.48101	4.4945	1.005
								2.08524	16.1983	1.32258		2.08524	16.1983	1.32258
								1.95629	4.13653	1.00325		1.95629	4.13653	1.00325
								1.82424	21.6364	1.06081		1.82424	21.6364	1.06081
								1.54322	6.75047	1.02944		1.54322	6.75047	1.02944
								2.38595	8.38434	1.01675		2.38595	8.38434	1.01675
								1.88737	1.73205	1		1.88737	1.73205	1
								2.61818	28.5178	1.0127		2.61818	28.5178	1.0127
								1.73546	8.31748	1.22635		1.73546	8.31748	1.22635
								1.76018	26.2575	1.10761		1.76018	26.2575	1.10761
								1.83102	16.8395	1.03249		1.83102	16.8395	1.03249
								1.61619	6.44883	1.04614		1.61619	6.44883	1.04614
								1.86267	14.3686	1.06801		1.86267	14.3686	1.06801
								1.57085	13.9765	1.39765		1.57085	13.9765	1.39765
								3.0718	8.69635	1.01783		3.0718	8.69635	1.01783
								2.93249	11.875	1.00362		2.93249	11.875	1.00362
								1.9868	21.9504	1.02344		1.9868	21.9504	1.02344
								1.73279	18.5466	2.156		1.73279	18.5466	2.156
								1.58825	12.3083	1.00834		1.58825	12.3083	1.00834
								1.87939	11.264	1.00347		1.87939	11.264	1.00347
								0.901196	7.34701	1.02879		0.901196	7.34701	1.02879
								2.18446	9.807	1.01152		2.18446	9.807	1.01152
								0.671415	3.42344	1.03221		0.671415	3.42344	1.03221
								4.03114	24.0177	1.02134		4.03114	24.0177	1.02134
								1.53292	7.01687	1.03458		1.53292	7.01687	1.03458
								2.16577	11.0784	1.00299		2.16577	11.0784	1.00299
								1.57163	16.1492	1.06717		1.57163	16.1492	1.06717
								2.14752	46.5988	1.05879		2.14752	46.5988	1.05879
								1.02194	7.46117	1.02487		1.02194	7.46117	1.02487
								1.92747	10.7935	1.03383		1.92747	10.7935	1.03383
								1.71412	63.6631	1.3573		1.71412	63.6631	1.3573
								2.08057	6.80687	1.06306		2.08057	6.80687	1.06306
								1.4367	18.1159	1.03562		1.4367	18.1159	1.03562
								2.31302	2.82843	1		2.31302	2.82843	1
								2.45816	5.17269	1.01445		2.45816	5.17269	1.01445
								1.45262	3.47728	1.04844		1.45262	3.47728	1.04844
								3.41237	9.28429	1.013		3.41237	9.28429	1.013
								1.83615	17.0122	1.24739		1.83615	17.0122	1.24739
								1.30978	2.28078	1.01999		1.30978	2.28078	1.01999
								1.83864	5.87355	1.00731		1.83864	5.87355	1.00731
								2.57839	15.2278	1.01519		2.57839	15.2278	1.01519
								1.53739	22.6713	1.09972		1.53739	22.6713	1.09972
								1.42706	17.4616	1.23472		1.42706	17.4616	1.23472
								2.05213	6.6137	1.00858		2.05213	6.6137	1.00858
								2.23346	37.8242	1.0356		2.23346	37.8242	1.0356
								1.70599	13.0661	1.01413		1.70599	13.0661	1.01413
								1.74721	15.7926	1.10032		1.74721	15.7926	1.10032
								1.81793	10.5932	1.0289		1.81793	10.5932	1.0289
								2.15445	7.92512	1.28562		2.15445	7.92512	1.28562
								1.91404	7.17665	1.01493		1.91404	7.17665	1.01493
								1.3544	6.4851	1.05202		1.3544	6.4851	1.05202
								1.40632	8.81897	1.05407		1.40632	8.81897	1.05407
								1.23653	18.7659	1.17058		1.23653	18.7659	1.17058
								1.98417	36.5499	1.65794		1.98417	36.5499	1.65794
								1.73446	14.4652	1.41843		1.73446	14.4652	1.41843
								1.54032	4.5842	1.00035		1.54032	4.5842	1.00035
								2.84366	3.14626	1.04875		2.84366	3.14626	1.04875
								1.85041	6.16828	1.05785		1.85041	6.16828	1.05785
								2.9843	32.6522	1.03933		2.9843	32.6522	1.03933
								1.69028	35.2787	1.08666		1.69028	35.2787	1.08666
								3.94816	9.32047	1.00505		3.94816	9.32047	1.00505
								2.13273	2.49194	1.11443		2.13273	2.49194	1.11443
								2.61273	4.41942	1.04167		2.61273	4.41942	1.04167
								2.73324	12.8655	1.04011		2.73324	12.8655	1.04011
								1.41901	13.1136	1.18725		1.41901	13.1136	1.18725
								0.728553	3.14626	1.40705		0.728553	3.14626	1.40705
								3.29213	6.75209	1.04187		3.29213	6.75209	1.04187
								0.728553	3.14626	1.40705		0.728553	3.14626	1.40705
								2.53503	10.2289	1.13654		2.53503	10.2289	1.13654
								1.77056	15.793	1.00898		1.77056	15.793	1.00898
								1.68344	8.89769	1.01399		1.68344	8.89769	1.01399
								1.54771	5.67891	1.0039		1.54771	5.67891	1.0039
								1.96772	7.62953	1.048		1.96772	7.62953	1.048
								1.49949	21.507	1.73308		1.49949	21.507	1.73308
								1.70126	13.1843	1.04889		1.70126	13.1843	1.04889
								3.19114	6.78375	1.01126		3.19114	6.78375	1.01126
								2.68399	6.16441	1		2.68399	6.16441	1
								1.81621	37.3257	1.13737		1.81621	37.3257	1.13737
								3.34587	16.4472	1.07519		3.34587	16.4472	1.07519
								1.89956	6.52298	1.00652		1.89956	6.52298	1.00652
								1.73289	17.8043	1.1106		1.73289	17.8043	1.1106
								2.54489	10.8471	1.05857		2.54489	10.8471	1.05857
								1.56742	19.7396	1.20132		1.56742	19.7396	1.20132
								1.46586	10.8279	1.08279		1.46586	10.8279	1.08279
								0.880922	2.28078	1.01999		0.880922	2.28078	1.01999
								0.977361	18.6716	1.12799		0.977361	18.6716	1.12799
								1.7674	17.4945	1.06076		1.7674	17.4945	1.06076
								1.5889	15.1233	1.0436		1.5889	15.1233	1.0436
								2.35418	10.0739	1.06188		2.35418	10.0739	1.06188
								1.81365	5.80039	1.059		1.81365	5.80039	1.059
								1.63657	27.5655	1.07136		1.63657	27.5655	1.07136
								2.38122	12.5299	1.04055		2.38122	12.5299	1.04055
								3.24934	23.1483	1.0055		3.24934	23.1483	1.0055
								1.1873	6.2087	1.13355		1.1873	6.2087	1.13355
								2.24843	17.5242	1.30982		2.24843	17.5242	1.30982
								1.56711	13.7232	1.13574		1.56711	13.7232	1.13574
								2.67594	4.94011	1.05324		2.67594	4.94011	1.05324
								3.09117	17.0217	1.02832		3.09117	17.0217	1.02832
								2.7322	19.8292	1.00538		2.7322	19.8292	1.00538
								2.26642	7.79626	1.01499		2.26642	7.79626	1.01499
								1.63121	7.24792	1.02501		1.63121	7.24792	1.02501
								1.2309	9.69316	1.04524		1.2309	9.69316	1.04524
								0.909525	15.732	1.311		0.909525	15.732	1.311
								1.55837	39.2146	1.44744		1.55837	39.2146	1.44744
								1.58539	39.2592	1.19022		1.58539	39.2592	1.19022
								1.18566	3.62819	1.14734		1.18566	3.62819	1.14734
								1.82498	30.1329	1.01348		1.82498	30.1329	1.01348
								1.62555	43.2085	1.91896		1.62555	43.2085	1.91896
								1.42672	6.4117	1.00134		1.42672	6.4117	1.00134
								1.58432	11.1785	1.0379		1.58432	11.1785	1.0379
								1.46252	6.74445	1.0054		1.46252	6.74445	1.0054
								1.42514	6.33014	1.08561		1.42514	6.33014	1.08561
								2.04645	13.9244	1.04076		2.04645	13.9244	1.04076
								2.71674	10.344	1.05027		2.71674	10.344	1.05027
								2.03374	6.89589	1.02798		2.03374	6.89589	1.02798
								3.25388	5.48791	1.01908		3.25388	5.48791	1.01908
								1.5458	26.8056	1.27646		1.5458	26.8056	1.27646
								3.73942	8.23977	1.00665		3.73942	8.23977	1.00665
								1.69578	5.59711	1.03936		1.69578	5.59711	1.03936
								2.19607	18.8604	1.03981		2.19607	18.8604	1.03981
								2.6288	4.13913	1.00389		2.6288	4.13913	1.00389
								1.01967	20.4405	1.03504		1.01967	20.4405	1.03504
								1.99087	3.03692	1.01231		1.99087	3.03692	1.01231
								2.57977	7.38385	1.00481		2.57977	7.38385	1.00481
								2.60632	4.4945	1.005		2.60632	4.4945	1.005
								1.50399	3.82135	1.0213		1.50399	3.82135	1.0213
								1.17897	4.40256	1.01002		1.17897	4.40256	1.01002
								2.30643	26.1711	1.03939		2.30643	26.1711	1.03939
								2.42076	17.1622	1.01482		2.42076	17.1622	1.01482
								2.0811	17.6476	1.03275		2.0811	17.6476	1.03275
								2.36299	18.0354	1.0327		2.36299	18.0354	1.0327
								2.59912	7.31271	1.02398		2.59912	7.31271	1.02398
								1.88182	7.02521	1.04726		1.88182	7.02521	1.04726
								1.21947	25.3797	1.01276		1.21947	25.3797	1.01276
								3.23452	4.4321	1.01679		3.23452	4.4321	1.01679
								1.32718	8.96981	1.22064		1.32718	8.96981	1.22064
								2.44443	18.503	1.01396		2.44443	18.503	1.01396
								2.48676	15.3805	1.01416		2.48676	15.3805	1.01416
								1.37841	5.39596	1.00201		1.37841	5.39596	1.00201
								2.15916	5.43795	1.0098		2.15916	5.43795	1.0098
								1.5562	14.2882	1.09585		1.5562	14.2882	1.09585
								2.80553	15.9925	1.06146		2.80553	15.9925	1.06146
								0.761204	7.25362	1.10617		0.761204	7.25362	1.10617
								4.26417	8.02115	1.027		4.26417	8.02115	1.027
								1.49949	8.79558	1.29684		1.49949	8.79558	1.29684
								3.04809	7.55243	1.02776		3.04809	7.55243	1.02776
								1.13671	9.52611	1.03938		1.13671	9.52611	1.03938
								1.56052	7.71116	1.05921		1.56052	7.71116	1.05921
								1.42399	33.3152	1.38096		1.42399	33.3152	1.38096
								2.31992	36.0089	1.20096		2.31992	36.0089	1.20096
								0.989583	10.7402	1.0905		0.989583	10.7402	1.0905
								1.33003	32.6383	1.0922		1.33003	32.6383	1.0922
								1.92132	7.6977	1.02865		1.92132	7.6977	1.02865
								2.19878	3.91812	1.04716		2.19878	3.91812	1.04716
								1.91846	58.7221	1.11574		1.91846	58.7221	1.11574
								0.728553	2.92252	1.68732		0.728553	2.92252	1.68732
								1.48926	9.39479	1.01307		1.48926	9.39479	1.01307
								2.80024	9.30385	1.03376		2.80024	9.30385	1.03376
								1.95357	5.02812	1.072		1.95357	5.02812	1.072
								1.34857	8.68595	1.10312		1.34857	8.68595	1.10312
								4.12871	8.03686	1.02068		4.12871	8.03686	1.02068
								1.09578	17.3547	1.1321		1.09578	17.3547	1.1321
								1.42877	38.2884	1.24949		1.42877	38.2884	1.24949
								2.27745	3.14626	1.04875		2.27745	3.14626	1.04875
								2.25277	6.19926	1.00565		2.25277	6.19926	1.00565
								1.54044	6.47996	1.02457		1.54044	6.47996	1.02457
								1.82374	11.5927	1.07175		1.82374	11.5927	1.07175
								2.44563	6.45352	1.00787		2.44563	6.45352	1.00787
								1.62611	2.28078	1.01999		1.62611	2.28078	1.01999
								1.5082	26.4549	1.08637		1.5082	26.4549	1.08637
								2.74861	12.7335	1.08394		2.74861	12.7335	1.08394
								3.19585	54.5766	1.00637		3.19585	54.5766	1.00637
								1.20552	3.7674	1.00688		1.20552	3.7674	1.00688
								2.14111	8.25807	1.07511		2.14111	8.25807	1.07511
								2.16928	21.8672	1.01736		2.16928	21.8672	1.01736
								1.80524	32.5817	1.11167		1.80524	32.5817	1.11167
								1.66196	28.9037	1.36102		1.66196	28.9037	1.36102
								3.39146	14.8569	1.0156		3.39146	14.8569	1.0156
								2.22545	12.723	1.02859		2.22545	12.723	1.02859
								2.89975	41.182	1.16294		2.89975	41.182	1.16294
								2.57135	5.43795	1.0098		2.57135	5.43795	1.0098
								1.33905	8.96829	1.04254		1.33905	8.96829	1.04254
								2.23977	9.99421	1.08402		2.23977	9.99421	1.08402
								2.47092	6.73065	1.01468		2.47092	6.73065	1.01468
								1.58019	55.3802	1.50115		1.58019	55.3802	1.50115
								1.07138	3.51178	1.05884		1.07138	3.51178	1.05884
								1.44199	3.82135	1.0213		1.44199	3.82135	1.0213
								1.88556	10.3982	1.06127		1.88556	10.3982	1.06127
								1.68837	4.97882	1.06149		1.68837	4.97882	1.06149
								2.11806	8.26999	1.15803		2.11806	8.26999	1.15803
								2.00138	8.22594	1.0203		2.00138	8.22594	1.0203
								2.08026	20.1984	1.02017		2.08026	20.1984	1.02017
								2.61817	8.55172	1.02951		2.61817	8.55172	1.02951
								2.75172	2.82843	1		2.75172	2.82843	1
								1.6777	3.87125	1.03464		1.6777	3.87125	1.03464
								1.66834	19.2336	1.31478		1.66834	19.2336	1.31478
								2.8523	19.4161	1.02761		2.8523	19.4161	1.02761
								2.10205	5.03146	1.02704		2.10205	5.03146	1.02704
								0.728553	3.14626	1.04875		0.728553	3.14626	1.04875
								1.74557	13.2291	1.20765		1.74557	13.2291	1.20765
								2.38865	8.47866	1.02071		2.38865	8.47866	1.02071
								1.86968	4.36949	1.00243		1.86968	4.36949	1.00243
								1.45488	9.72688	1.20647		1.45488	9.72688	1.20647
								2.11209	4.13653	1.00325		2.11209	4.13653	1.00325
								1.51293	25.5547	1.15444		1.51293	25.5547	1.15444
								1.60938	5.90268	1.0123		1.60938	5.90268	1.0123
								1.81007	21.2215	1.09734		1.81007	21.2215	1.09734
								1.29127	39.8104	1.09326		1.29127	39.8104	1.09326
								3.7183	3.47728	1.04844		3.7183	3.47728	1.04844
								3.57752	13.1644	1.00671		3.57752	13.1644	1.00671
								4.32894	41.7313	1.01006		4.32894	41.7313	1.01006
								1.49973	17.1002	1.15029		1.49973	17.1002	1.15029
								1.37645	9.63288	1.03874		1.37645	9.63288	1.03874
								1.80841	1.73205	1		1.80841	1.73205	1
								2.23959	14.7641	1.11926		2.23959	14.7641	1.11926
								2.73905	18.6592	1.00898		2.73905	18.6592	1.00898
								4.91409	11.5722	1.00344		4.91409	11.5722	1.00344
								1.80291	12.9217	1.01522		1.80291	12.9217	1.01522
								2.32989	3.62819	1.14734		2.32989	3.62819	1.14734
								2.73192	70.5445	1.05715		2.73192	70.5445	1.05715
								1.81864	23.6474	1.13121		1.81864	23.6474	1.13121
								1.90216	5.52667	1.00903		1.90216	5.52667	1.00903
								2.78588	21.3203	1.01872		2.78588	21.3203	1.01872
								3.26481	4.13653	1.00325		3.26481	4.13653	1.00325
								1.98174	11.6392	1.02478		1.98174	11.6392	1.02478
								1.73388	19.0337	1.67582		1.73388	19.0337	1.67582
								1.2505	15.126	1.04629		1.2505	15.126	1.04629
								2.16878	31.74	1.88011		2.16878	31.74	1.88011
								1.75752	19.6355	1.1972		1.75752	19.6355	1.1972
								2.89966	7.58119	1.08303		2.89966	7.58119	1.08303
								3.34862	14.0768	1.00806		3.34862	14.0768	1.00806
								1.49444	12.393	1.18163		1.49444	12.393	1.18163
								1.4011	8.3467	1.01219		1.4011	8.3467	1.01219
								1.32877	30.6649	1.11454		1.32877	30.6649	1.11454
								2.31665	4.62302	1.00883		2.31665	4.62302	1.00883
								2.30721	3.4641	1		2.30721	3.4641	1
								3.5612	13.373	1.01673		3.5612	13.373	1.01673
								1.78573	19.4643	1.19794		1.78573	19.4643	1.19794
								1.43336	10.5135	1.05665		1.43336	10.5135	1.05665
								1.50414	40.1088	1.22904		1.50414	40.1088	1.22904
								1.49146	7.57371	1.03065		1.49146	7.57371	1.03065
								1.78172	78.2824	1.30002		1.78172	78.2824	1.30002
								1.37201	26.6284	1.0871		1.37201	26.6284	1.0871
								1.10432	28.9451	1.41745		1.10432	28.9451	1.41745
								2.02012	4.4321	1.01679		2.02012	4.4321	1.01679
								1.49544	23.1562	1.17256		1.49544	23.1562	1.17256
								1.67153	13.374	1.03802		1.67153	13.374	1.03802
								2.28463	12.1337	1.02916		2.28463	12.1337	1.02916
								2.05537	18.2542	1.03014		2.05537	18.2542	1.03014
								3.06228	3.6699	1.05941		3.06228	3.6699	1.05941
								2.11339	1.73205	1		2.11339	1.73205	1
								1.77819	9.52217	1.00935		1.77819	9.52217	1.00935
								1.5145	5.04929	1.00986		1.5145	5.04929	1.00986
								1.99692	10.4448	1.10098		1.99692	10.4448	1.10098
								1.62508	6.83875	1.26992		1.62508	6.83875	1.26992
								1.24211	14.2308	1.09468		1.24211	14.2308	1.09468
								2.97319	16.8692	1.04418		2.97319	16.8692	1.04418
								2.02659	21.8595	1.23557		2.02659	21.8595	1.23557
								1.68024	12.2271	1.09363		1.68024	12.2271	1.09363
								0.766646	6.33448	1.02759		0.766646	6.33448	1.02759
								2.76253	15.9367	1.0463		2.76253	15.9367	1.0463
								2.45521	3.61537	1.00272		2.45521	3.61537	1.00272
								1.31539	21.3979	1.08352		1.31539	21.3979	1.08352
								1.71036	3.83055	1.02376		1.71036	3.83055	1.02376
								0.899968	3	1		0.899968	3	1
								1.49533	21.3603	1.10451		1.49533	21.3603	1.10451
								2.14326	14.6086	1.01783		2.14326	14.6086	1.01783
								1.3409	19.4113	1.11149		1.3409	19.4113	1.11149
								0.804738	1.41421	1		0.804738	1.41421	1
								2.26139	13.1947	1.03349		2.26139	13.1947	1.03349
								1.24	22.7652	1.1469		1.24	22.7652	1.1469
								2.09176	17.7353	1.04871		2.09176	17.7353	1.04871
								3.60378	41.8245	1.01649		3.60378	41.8245	1.01649
								3.22225	31.7806	1.0121		3.22225	31.7806	1.0121
								1.89244	29.1392	1.12997		1.89244	29.1392	1.12997
								1.72147	15.5926	1.09439		1.72147	15.5926	1.09439
								1.98979	10.222	1.10873		1.98979	10.222	1.10873
								1.48381	16.5474	1.07715		1.48381	16.5474	1.07715
								1.50964	4.69201	1.02388		1.50964	4.69201	1.02388
								0.804738	3.03692	1.01231		0.804738	3.03692	1.01231
								0.785692	3.67571	1.01946		0.785692	3.67571	1.01946
								5.19096	5.59711	1.03936		5.19096	5.59711	1.03936
								2.7203	8.46234	1.04164		2.7203	8.46234	1.04164
								1.56088	17.0013	1.18454		1.56088	17.0013	1.18454
								2.29616	25.4126	1.01327		2.29616	25.4126	1.01327
								3.29784	2.82843	1		3.29784	2.82843	1
								1.61127	5.20323	1.04065		1.61127	5.20323	1.04065
								3.50776	6.4117	1.00134		3.50776	6.4117	1.00134
								1.69846	26.7116	1.14315		1.69846	26.7116	1.14315
								1.59866	15.0867	1.21572		1.59866	15.0867	1.21572
								1.71609	9.52433	1.00958		1.71609	9.52433	1.00958
								1.5865	16.7501	1.08804		1.5865	16.7501	1.08804
								1.1422	4.4321	1.01679		1.1422	4.4321	1.01679
								3.46268	12.1776	1.00782		3.46268	12.1776	1.00782
								1.44248	10.5249	1.00351		1.44248	10.5249	1.00351
								1.59076	6.03097	1.1011		1.59076	6.03097	1.1011
								3.14738	5.87355	1.00731		3.14738	5.87355	1.00731
								1.12569	4.2098	1.02103		1.12569	4.2098	1.02103
								1.68537	5.90268	1.0123		1.68537	5.90268	1.0123
								2.08106	3.87125	1.03464		2.08106	3.87125	1.03464
								1.6601	6.35452	1.03084		1.6601	6.35452	1.03084
								2.39214	1.73205	1		2.39214	1.73205	1
								1.84173	13.053	1.11929		1.84173	13.053	1.11929
								2.46626	8.25201	1.01575		2.46626	8.25201	1.01575
								1.61627	11.2176	1.01559		1.61627	11.2176	1.01559
								2.54755	1.73205	1		2.54755	1.73205	1
								2.19581	15.4877	1.01246		2.19581	15.4877	1.01246
								1.71375	25.4286	1.05134		1.71375	25.4286	1.05134
								2.74307	9.63027	1.01512		2.74307	9.63027	1.01512
								2.25727	15.8472	1.10682		2.25727	15.8472	1.10682
								1.50891	6.77521	1.00999		1.50891	6.77521	1.00999
								1.71076	30.3588	1.21145		1.71076	30.3588	1.21145
								2.26801	2.73205	1.11536		2.26801	2.73205	1.11536
								1.68486	10.941	1.02472		1.68486	10.941	1.02472
								1.87837	9.98683	1.03006		1.87837	9.98683	1.03006
								2.07371	8.51669	1.02529		2.07371	8.51669	1.02529
								2.72374	3.4641	1.73205		2.72374	3.4641	1.73205
								1.32565	14.8076	1.06587		1.32565	14.8076	1.06587
								1.74364	46.8639	1.44419		1.74364	46.8639	1.44419
								1.54186	39.7937	1.09034		1.54186	39.7937	1.09034
								1.56678	8.70992	1.1964		1.56678	8.70992	1.1964
								1.83689	43.9832	1.14329		1.83689	43.9832	1.14329
								2.40454	8.1569	1.01174		2.40454	8.1569	1.01174
								2.12177	77.0071	1.09365		2.12177	77.0071	1.09365
								2.61118	17.0578	1.10569		2.61118	17.0578	1.10569
								2.70402	9.97248	1.00737		2.70402	9.97248	1.00737
								1.21509	35.8153	1.04752		1.21509	35.8153	1.04752
								1.71835	7.66424	1.16879		1.71835	7.66424	1.16879
								3.99375	5.20323	1.04065		3.99375	5.20323	1.04065
								1.58667	2.73205	1.11536		1.58667	2.73205	1.11536
								2.36627	27.0994	1.08052		2.36627	27.0994	1.08052
								1.96317	12.472	1.01162		1.96317	12.472	1.01162
								2.46906	9.93565	1.00365		2.46906	9.93565	1.00365
								1.79018	20.5259	1.28791		1.79018	20.5259	1.28791
								2.12843	3.42344	1.03221		2.12843	3.42344	1.03221
								2.38235	10.7158	1.02171		2.38235	10.7158	1.02171
								3.3984	5.00901	1.0018		3.3984	5.00901	1.0018
								3.12407	11.591	1.01271		3.12407	11.591	1.01271
								1.19807	9.19092	1.00883		1.19807	9.19092	1.00883
								2.54502	13.0443	1.04774		2.54502	13.0443	1.04774
								1.55086	8.59826	1.05837		1.55086	8.59826	1.05837
								3.06436	19.1893	1.09877		3.06436	19.1893	1.09877
								2.79449	3.14626	1.04875		2.79449	3.14626	1.04875
								1.5832	18.227	1.08733		1.5832	18.227	1.08733
								2.66554	11.0439	1.00399		2.66554	11.0439	1.00399
								1.7783	40.6538	1.06033		1.7783	40.6538	1.06033
								2.50865	3.14626	1.04875		2.50865	3.14626	1.04875
								1.74958	8.4453	1.03954		1.74958	8.4453	1.03954
								1.67143	7.10808	1.00523		1.67143	7.10808	1.00523
								1.65042	8.1707	1.00574		1.65042	8.1707	1.00574
								1.93799	24.0869	1.06764		1.93799	24.0869	1.06764
								1.77457	16.3074	1.07528		1.77457	16.3074	1.07528
								1.77462	19.415	1.1117		1.77462	19.415	1.1117
								2.32765	4.75232	1.0132		2.32765	4.75232	1.0132
								2.98351	2.73205	1.11536		2.98351	2.73205	1.11536
								1.94548	7.61377	1.05584		1.94548	7.61377	1.05584
								2.01198	9.35648	1.03325		2.01198	9.35648	1.03325
								2.06887	10.1794	1.11734		2.06887	10.1794	1.11734
								1.7807	2.54951	1.04083		1.7807	2.54951	1.04083
								1.63097	7.68882	1.00959		1.63097	7.68882	1.00959
								1.0314	9.6669	1.0741		1.0314	9.6669	1.0741
								1.76485	11.2221	1.04195		1.76485	11.2221	1.04195
								2.14589	9.95019	1.10558		2.14589	9.95019	1.10558
								1.66724	30.342	1.08226		1.66724	30.342	1.08226
								1.35448	12.7176	1.08654		1.35448	12.7176	1.08654
								1.69949	12.533	1.03724		1.69949	12.533	1.03724
								2.28504	9.87387	1.0408		2.28504	9.87387	1.0408
								2.83995	17.1377	1.00291		2.83995	17.1377	1.00291
								1.4659	39.4777	1.2669		1.4659	39.4777	1.2669
								3.0656	8.57272	1.02464		3.0656	8.57272	1.02464
								2.01005	2.54951	1.04083		2.01005	2.54951	1.04083
								1.78201	84.7843	1.37088		1.78201	84.7843	1.37088
								1.4626	5.63172	1.02821		1.4626	5.63172	1.02821
								1.91541	23.9252	1.08083		1.91541	23.9252	1.08083
								1.71355	9.3007	1.15361		1.71355	9.3007	1.15361
								1.18047	10.4741	1.01734		1.18047	10.4741	1.01734
								2.03593	14.2862	1.04751		2.03593	14.2862	1.04751
								2.5623	8.43093	1.01496		2.5623	8.43093	1.01496
								2.78496	28.941	1.0194		2.78496	28.941	1.0194
								1.98465	40.1294	1.1265		1.98465	40.1294	1.1265
								1.25628	13.7516	1.00832		1.25628	13.7516	1.00832
								1.41407	14.1155	1.16423		1.41407	14.1155	1.16423
								1.78188	3.67571	1.01946		1.78188	3.67571	1.01946
								1.44397	2	1		1.44397	2	1
								1.05591	19.7007	1.71473		1.05591	19.7007	1.71473
								0.977877	14.7513	1.09646		0.977877	14.7513	1.09646
								1.46731	33.0609	2.01576		1.46731	33.0609	2.01576
								1.50394	13.6903	1.18266		1.50394	13.6903	1.18266
								1.87539	30.6157	1.035		1.87539	30.6157	1.035
								2.19908	7.96432	1.01147		2.19908	7.96432	1.01147
								2.39928	8.52923	1.05792		2.39928	8.52923	1.05792
								1.70943	10.494	1.04419		1.70943	10.494	1.04419
								1.39717	8.77586	1.02714		1.39717	8.77586	1.02714
								1.95779	7.813	1.04406		1.95779	7.813	1.04406
								2.99238	9.07534	1.03423		2.99238	9.07534	1.03423
								3.33183	12.7108	1.01122		3.33183	12.7108	1.01122
								3.13109	10.5111	1.04589		3.13109	10.5111	1.04589
								2.70698	5.27248	1.01469		2.70698	5.27248	1.01469
								1.97837	15.5559	1.04405		1.97837	15.5559	1.04405
								2.7669	6.2994	1.0219		2.7669	6.2994	1.0219
								2.1404	4.34554	1.02425		2.1404	4.34554	1.02425
								1.78192	3.14626	1.04875		1.78192	3.14626	1.04875
								1.53156	24.2086	1.0762		1.53156	24.2086	1.0762
								1.33967	3.7674	1.00688		1.33967	3.7674	1.00688
								1.78259	5.17269	1.01445		1.78259	5.17269	1.01445
								1.71626	27.4776	1.13509		1.71626	27.4776	1.13509
								1.5731	22.637	1.14627		1.5731	22.637	1.14627
								2.91062	3.14626	1.04875		2.91062	3.14626	1.04875
								1.65158	10.4899	1.15842		1.65158	10.4899	1.15842
								1.5745	11.1515	1.27916		1.5745	11.1515	1.27916
								1.33487	12.7212	1.15647		1.33487	12.7212	1.15647
								1.93401	9.12235	1.06045		1.93401	9.12235	1.06045
								1.37965	9.19583	1.26314		1.37965	9.19583	1.26314
								3.06414	10.126	1.07335		3.06414	10.126	1.07335
								2.73165	5.50173	1.02165		2.73165	5.50173	1.02165
								2.556	25.8042	1.0192		2.556	25.8042	1.0192
								2.20414	19.5673	1.00643		2.20414	19.5673	1.00643
								2.66299	3.6699	1.05941		2.66299	3.6699	1.05941
								2.88625	3.14626	1.04875		2.88625	3.14626	1.04875
								1.52336	11.3512	1.01529		1.52336	11.3512	1.01529
								1.63044	19.527	1.10906		1.63044	19.527	1.10906
								1.66311	30.3417	1.35965		1.66311	30.3417	1.35965
								2.7647	76.2297	1.01894		2.7647	76.2297	1.01894
								1.37881	2.5184	1.02813		1.37881	2.5184	1.02813
								2.1889	9.32508	1.02356		2.1889	9.32508	1.02356
								2.52789	4.6992	1.00187		2.52789	4.6992	1.00187
								2.52296	13.5037	1.0065		2.52296	13.5037	1.0065
								1.30776	11.6113	1.12251		1.30776	11.6113	1.12251
								2.77808	7.1807	1.0155		2.77808	7.1807	1.0155
								3.81625	3.25653	1.02981		3.81625	3.25653	1.02981
								3.69338	5.39418	1.00167		3.69338	5.39418	1.00167
								2.1098	6.70779	1.03503		2.1098	6.70779	1.03503
								1.69371	19.0433	1.12803		1.69371	19.0433	1.12803
								2.25929	4.6992	1.00187		2.25929	4.6992	1.00187
								2.77716	27.5168	1.09717		2.77716	27.5168	1.09717
								2.50731	24.6219	1.09893		2.50731	24.6219	1.09893
								2.90742	11.0009	1.03033		2.90742	11.0009	1.03033
								1.50519	20.3964	1.20818		1.50519	20.3964	1.20818
								2.06679	36.2215	1.67613		2.06679	36.2215	1.67613
								1.51721	14.6306	1.01202		1.51721	14.6306	1.01202
								2.32538	7.84437	1.02125		2.32538	7.84437	1.02125
								1.26913	10.4193	1.04193		1.26913	10.4193	1.04193
								2.33924	14.1258	1.04997		2.33924	14.1258	1.04997
								3.48082	12.7905	1.00491		3.48082	12.7905	1.00491
								2.77627	14.3136	1.0071		2.77627	14.3136	1.0071
								1.74347	20.3383	1.23775		1.74347	20.3383	1.23775
								2.69091	10.4244	1.00777		2.69091	10.4244	1.00777
								1.81217	5.20374	1.02054		1.81217	5.20374	1.02054
								1.51272	14.5652	1.40154		1.51272	14.5652	1.40154
								1.7805	13.2613	1.09751		1.7805	13.2613	1.09751
								1.38103	21.0626	1.67565		1.38103	21.0626	1.67565
								1.21449	7.46692	1.16614		1.21449	7.46692	1.16614
								1.25566	34.4174	1.21005		1.25566	34.4174	1.21005
								1.62049	37.3445	1.13165		1.62049	37.3445	1.13165
								2.8454	7.71216	1.00404		2.8454	7.71216	1.00404
								1.47215	18.9518	1.04169		1.47215	18.9518	1.04169
								0.96081	8.06928	1.05053		0.96081	8.06928	1.05053
								1.43501	13.6855	1.16079		1.43501	13.6855	1.16079
								1.09084	24.1344	1.26848		1.09084	24.1344	1.26848
								1.60079	8.83394	1.08738		1.60079	8.83394	1.08738
								1.30677	10.46	1.02079		1.30677	10.46	1.02079
								1.68084	20.0488	1.14424		1.68084	20.0488	1.14424
								1.80002	10.5478	1.01496		1.80002	10.5478	1.01496
								1.56094	2.28078	1.01999		1.56094	2.28078	1.01999
								2.42785	8.31691	1.05625		2.42785	8.31691	1.05625
								1.50221	15.2741	1.23484		1.50221	15.2741	1.23484
								3.24078	19.4797	1.01962		3.24078	19.4797	1.01962
								2.48539	9.23241	1.01339		2.48539	9.23241	1.01339
								1.59806	14.7242	1.13263		1.59806	14.7242	1.13263
								1.64507	8.99366	1.02492		1.64507	8.99366	1.02492
								1.35859	13.3712	1.1912		1.35859	13.3712	1.1912
								1.55141	11.8507	1.24917		1.55141	11.8507	1.24917
								1.81629	5.15226	1.01044		1.81629	5.15226	1.01044
								3.28879	15.3813	1.01421		3.28879	15.3813	1.01421
								1.66957	11.6403	1.04114		1.66957	11.6403	1.04114
								3.45899	18.5118	1.02527		3.45899	18.5118	1.02527
								2.70458	90.6252	1.10281		2.70458	90.6252	1.10281
								1.48421	4.36949	1.00243		1.48421	4.36949	1.00243
								2.24342	4.34554	1.02425		2.24342	4.34554	1.02425
								1.23308	11.5796	1.01172		1.23308	11.5796	1.01172
								2.18487	7.50705	1.06166		2.18487	7.50705	1.06166
								1.20152	9.91309	1.04493		1.20152	9.91309	1.04493
								3.86827	3.14626	1.04875		3.86827	3.14626	1.04875
								3.56192	2.82843	1.1547		3.56192	2.82843	1.1547
								2.147	5.17269	1.01445		2.147	5.17269	1.01445
								1.08715	13.14	1.05885		1.08715	13.14	1.05885
								2.56926	5.00901	1.0018		2.56926	5.00901	1.0018
								1.85721	27.8514	1.0728		1.85721	27.8514	1.0728
								4.46982	8.32085	1.16515		4.46982	8.32085	1.16515
								1.50187	11.4819	1.01092		1.50187	11.4819	1.01092
								2.32055	19.1178	1.21398		2.32055	19.1178	1.21398
								1.13596	1.41421	1		1.13596	1.41421	1
								1.44968	18.6285	1.05974		1.44968	18.6285	1.05974
								1.57724	5.38516	1.07703		1.57724	5.38516	1.07703
								1.29669	12.5003	1.11362		1.29669	12.5003	1.11362
								1.39152	17.1813	2.68328		1.39152	17.1813	2.68328
								1.94582	15.0446	1.20841		1.94582	15.0446	1.20841
								1.23733	16.2425	1.06408		1.23733	16.2425	1.06408
								1.7111	4.36949	1.00243		1.7111	4.36949	1.00243
								1.22286	12.648	1.02589		1.22286	12.648	1.02589
								1.46095	11.4294	1.00243		1.46095	11.4294	1.00243
								1.10007	8.33818	1.01115		1.10007	8.33818	1.01115
								1.81485	10.6694	1.13096		1.81485	10.6694	1.13096
								1.98538	12.8732	1.26232		1.98538	12.8732	1.26232
								0.945501	5.77915	1.05512		0.945501	5.77915	1.05512
								2.18116	4.77573	1.01819		2.18116	4.77573	1.01819
								1.48371	3.42344	1.03221		1.48371	3.42344	1.03221
								1.66706	2.28078	1.01999		1.66706	2.28078	1.01999
								1.25519	8.27538	1.17031		1.25519	8.27538	1.17031
								1.10948	2.5184	1.02813		1.10948	2.5184	1.02813
								1.81208	35.1367	1.13999		1.81208	35.1367	1.13999
								2.50102	16.0013	1.04828		2.50102	16.0013	1.04828
								1.28073	6.77238	1.02097		1.28073	6.77238	1.02097
								1.11111	3.25653	1.02981		1.11111	3.25653	1.02981
								2.52305	17.6352	1.06538		2.52305	17.6352	1.06538
								3.47327	5.96081	1.02227		3.47327	5.96081	1.02227
								1.89087	63.5862	1.05626		1.89087	63.5862	1.05626
								1.51395	12.2618	1.05925		1.51395	12.2618	1.05925
								3.58619	9.41246	1.00337		3.58619	9.41246	1.00337
								2.12759	7.82228	1.09534		2.12759	7.82228	1.09534
								1.94223	34.1743	2.17007		1.94223	34.1743	2.17007
								2.32253	4.54148	1.13537		2.32253	4.54148	1.13537
								2.28942	1.41421	1		2.28942	1.41421	1
								1.40897	19.7768	1.04964		1.40897	19.7768	1.04964
								2.31011	5.70156	1.16383		2.31011	5.70156	1.16383
								3.12586	3.31631	1.10544		3.12586	3.31631	1.10544
								1.6938	10.1382	1.02411		1.6938	10.1382	1.02411
								1.65936	19.7933	1.05499		1.65936	19.7933	1.05499
								2.2514	7.55668	1.0098		2.2514	7.55668	1.0098
								3.12127	11.3578	1		3.12127	11.3578	1
								1.37204	18.3438	1.01597		1.37204	18.3438	1.01597
								1.06	12.8132	1.0226		1.06	12.8132	1.0226
								2.66701	43.1818	1.01471		2.66701	43.1818	1.01471
								3.08411	3.91812	1.04716		3.08411	3.91812	1.04716
								1.69002	20.6891	1.07703		1.69002	20.6891	1.07703
								1.13995	4.89898	1		1.13995	4.89898	1
								1.98344	7.35075	1.03955		1.98344	7.35075	1.03955
								1.05506	8.13975	1.10768		1.05506	8.13975	1.10768
								1.50554	13.4388	1.25866		1.50554	13.4388	1.25866
								1.69516	20.4821	1.12921		1.69516	20.4821	1.12921
								1.62826	33.3379	1.23728		1.62826	33.3379	1.23728
								1.3332	19.365	1.17851		1.3332	19.365	1.17851
								1.87329	34.0879	1.30914		1.87329	34.0879	1.30914
								1.6941	2.5184	1.02813		1.6941	2.5184	1.02813
								2.56968	6.97279	1.03944		2.56968	6.97279	1.03944
								2.3798	4.24264	1		2.3798	4.24264	1
								1.53393	47.0676	1.33771		1.53393	47.0676	1.33771
								1.99276	14.632	1.01212		1.99276	14.632	1.01212
								1.72653	20.6198	1.26428		1.72653	20.6198	1.26428
								3.56924	2.41421	1.07967		3.56924	2.41421	1.07967
								2.85966	8.93924	1.03917		2.85966	8.93924	1.03917
								3.05695	13.8991	1.1164		3.05695	13.8991	1.1164
								2.22808	2.82843	1		2.22808	2.82843	1
								3.09687	8.99431	1.025		3.09687	8.99431	1.025
								1.90143	18.244	1.2056		1.90143	18.244	1.2056
								3.09893	4.4321	1.01679		3.09893	4.4321	1.01679
								3.25002	6.9282	1		3.25002	6.9282	1
								1.62917	14.3503	1.01219		1.62917	14.3503	1.01219
								2.1454	11.4591	1.06395		2.1454	11.4591	1.06395
								2.07769	9.43821	1.08983		2.07769	9.43821	1.08983
								1.90721	53.0764	1.04091		1.90721	53.0764	1.04091
								1.91211	8.38219	1.03968		1.91211	8.38219	1.03968
								2.91296	10.147	1.00966		2.91296	10.147	1.00966
								2.147	4.54358	1.07093		2.147	4.54358	1.07093
								2.16102	11.3792	1.03447		2.16102	11.3792	1.03447
								1.69731	14.5941	1.06156		1.69731	14.5941	1.06156
								2.25742	20.5143	1.04011		2.25742	20.5143	1.04011
								1.49613	11.9026	1.06037		1.49613	11.9026	1.06037
								1.53009	2.5184	1.02813		1.53009	2.5184	1.02813
								1.25781	10.0891	1.01915		1.25781	10.0891	1.01915
								2.63089	12.2008	1.04621		2.63089	12.2008	1.04621
								1.53817	14.4551	1.06276		1.53817	14.4551	1.06276
								1.31316	8.38057	1.02385		1.31316	8.38057	1.02385
								1.46614	17.4492	1.04653		1.46614	17.4492	1.04653
								1.74109	8.32705	1.03284		1.74109	8.32705	1.03284
								1.79572	10.5249	1.00811		1.79572	10.5249	1.00811
								1.27808	13.6645	1.05111		1.27808	13.6645	1.05111
								3.19244	2.28078	1.01999		3.19244	2.28078	1.01999
								1.68933	12.6013	1.10521		1.68933	12.6013	1.10521
								1.79588	39.2211	1.03609		1.79588	39.2211	1.03609
								1.72444	14.2937	1.02359		1.72444	14.2937	1.02359
								1.86636	4.62302	1.00883		1.86636	4.62302	1.00883
								1.87949	15.3821	1.04662		1.87949	15.3821	1.04662
								2.91097	17.8188	1.0687		2.91097	17.8188	1.0687
								2.08779	13.2884	1.01619		2.08779	13.2884	1.01619
								1.20836	7.42926	1.02049		1.20836	7.42926	1.02049
								3.02148	6.76294	1.05619		3.02148	6.76294	1.05619
								1.41986	12.9469	1.00792		1.41986	12.9469	1.00792
								1.75338	21.0242	1.11901		1.75338	21.0242	1.11901
								3.67494	18.2559	1.01422		3.67494	18.2559	1.01422
								1.73333	2.5184	1.02813		1.73333	2.5184	1.02813
								1.45392	5.03395	1.00679		1.45392	5.03395	1.00679
								3.82772	45.1724	1.04016		3.82772	45.1724	1.04016
								2.14896	1.73205	1		2.14896	1.73205	1
								2.22423	14.6858	1.04368		2.22423	14.6858	1.04368
								1.30377	13.2799	1.47554		1.30377	13.2799	1.47554
								1.67244	20.8641	1.41309		1.67244	20.8641	1.41309
								1.18566	2	1		1.18566	2	1
								1.04028	10.0857	1.17244		1.04028	10.0857	1.17244
								2.54979	9.26538	1.02949		2.54979	9.26538	1.02949
								1.81509	3.83055	1.02376		1.81509	3.83055	1.02376
								2.71138	5.40705	1.00406		2.71138	5.40705	1.00406
								1.634	14.805	1.06021		1.634	14.805	1.06021
								3.11978	8.12871	1.10618		3.11978	8.12871	1.10618
								1.57646	1.41421	1		1.57646	1.41421	1
								1.5446	10.4333	1.1452		1.5446	10.4333	1.1452
								2.61014	4.75232	1.0132		2.61014	4.75232	1.0132
								2.40649	11.5653	1.02224		2.40649	11.5653	1.02224
								1.93023	6.16184	1.12499		1.93023	6.16184	1.12499
								2.3428	5.84234	1.00195		2.3428	5.84234	1.00195
								2.11571	3.7674	1.00688		2.11571	3.7674	1.00688
								3.04602	2.73205	1.11536		3.04602	2.73205	1.11536
								2.55434	21.2707	1.06621		2.55434	21.2707	1.06621
								1.41656	8.87291	1.06817		1.41656	8.87291	1.06817
								2.10989	20.6474	1.0634		2.10989	20.6474	1.0634
								2.93932	13.6335	1.01337		2.93932	13.6335	1.01337
								1.85326	9.34282	1.03809		1.85326	9.34282	1.03809
								1.86297	23.2238	1.02436		1.86297	23.2238	1.02436
								3.14543	17.0619	1.01783		3.14543	17.0619	1.01783
								1.42257	15.8607	1.1537		1.42257	15.8607	1.1537
								1.90334	7.05298	1.00757		1.90334	7.05298	1.00757
								2.4222	22.2086	1.05635		2.4222	22.2086	1.05635
								1.6804	20.1785	1.0365		1.6804	20.1785	1.0365
								1.72458	35.0629	1.94195		1.72458	35.0629	1.94195
								3.21607	10.9219	1.05096		3.21607	10.9219	1.05096
								1.50422	4.45757	1.02264		1.50422	4.45757	1.02264
								1.74151	16.2655	1.12511		1.74151	16.2655	1.12511
								1.83639	13.3936	1.02724		1.83639	13.3936	1.02724
								2.57838	6.75644	1.00719		2.57838	6.75644	1.00719
								1.84519	6.44981	1.00729		1.84519	6.44981	1.00729
								2.01319	35.2364	1.18647		2.01319	35.2364	1.18647
								3.16148	4.62302	1.00883		3.16148	4.62302	1.00883
								2.96719	3.4641	1		2.96719	3.4641	1
								2.15581	25.2358	1.02768		2.15581	25.2358	1.02768
								1.51816	17.8722	1.1214		1.51816	17.8722	1.1214
								1.10975	26.9237	1.17393		1.10975	26.9237	1.17393
								1.34616	44.6409	1.4326		1.34616	44.6409	1.4326
								1.64435	4.47214	1		1.64435	4.47214	1
								2.89387	10.6269	1.02258		2.89387	10.6269	1.02258
								2.14798	12.7429	1.00428		2.14798	12.7429	1.00428
								2.16427	10.618	1.06715		2.16427	10.618	1.06715
								3.12269	19.8614	1.02839		3.12269	19.8614	1.02839
								1.71011	6.44981	1.00729		1.71011	6.44981	1.00729
								1.77981	3	1		1.77981	3	1
								1.4055	15.5533	1.05827		1.4055	15.5533	1.05827
								2.51741	14.9399	1.00954		2.51741	14.9399	1.00954
								5.01324	22.1495	1.05835		5.01324	22.1495	1.05835
								6.29381	4.4321	1.01679		6.29381	4.4321	1.01679
								6.02107	20.9065	1.01411		6.02107	20.9065	1.01411
								1.77886	21.5317	1.28219		1.77886	21.5317	1.28219
								6.09553	32.7934	1.01251		6.09553	32.7934	1.01251
								1.56119	29.6297	1.36237		1.56119	29.6297	1.36237
								1.93724	27.7576	1.14763		1.93724	27.7576	1.14763
								1.93124	9.04338	1.04424		1.93124	9.04338	1.04424
								1.87805	6.47962	1.06524		1.87805	6.47962	1.06524
								2.24926	18.3203	1.04901		2.24926	18.3203	1.04901
								2.14406	3.78821	1.05066		2.14406	3.78821	1.05066
								2.75783	9.89005	1.00418		2.75783	9.89005	1.00418
								1.9692	11.074	1.0756		1.9692	11.074	1.0756
								1.59508	4.36949	1.00243		1.59508	4.36949	1.00243
								2.1259	3.7674	1.00688		2.1259	3.7674	1.00688
								2.39353	10.4079	1.00617		2.39353	10.4079	1.00617
								0.995199	5.10303	1.2028		0.995199	5.10303	1.2028
								2.28124	5.39071	1.03744		2.28124	5.39071	1.03744
								2.34704	19.3042	1.02312		2.34704	19.3042	1.02312
								3.64748	4.75232	1.0132		3.64748	4.75232	1.0132
								2.81114	13.239	1.02755		2.81114	13.239	1.02755
								2.64131	11.1432	1.00885		2.64131	11.1432	1.00885
								1.61775	11.4184	1.05114		1.61775	11.4184	1.05114
								1.80299	8.0664	1.02443		1.80299	8.0664	1.02443
								1.52923	31.0056	1.05361		1.52923	31.0056	1.05361
								1.31236	6.03051	1.03422		1.31236	6.03051	1.03422
								2.9836	15.3191	1.01011		2.9836	15.3191	1.01011
								2.53838	10.24	1.04511		2.53838	10.24	1.04511
								1.31988	4.77799	1.04264		1.31988	4.77799	1.04264
								1.53716	5.02494	1.09653		1.53716	5.02494	1.09653
								1.18566	2	1		1.18566	2	1
								1.8816	8.4276	1.03737		1.8816	8.4276	1.03737
								2.99578	2.41421	1.07967		2.99578	2.41421	1.07967
								2.28116	15.0557	1.01737		2.28116	15.0557	1.01737
								2.04053	13.9185	1.11081		2.04053	13.9185	1.11081
								1.2097	11.7628	1.0521		1.2097	11.7628	1.0521
								2.90782	14.5192	1.01905		2.90782	14.5192	1.01905
								3.11838	10.393	1.04453		3.11838	10.393	1.04453
								3.00146	12.2591	1.03608		3.00146	12.2591	1.03608
								1.13904	21.9199	1.04499		1.13904	21.9199	1.04499
								1.18566	1.41421	1		1.18566	1.41421	1
								1.38515	10.1498	1.10744		1.38515	10.1498	1.10744
								3.12048	8.85412	1.00902		3.12048	8.85412	1.00902
								1.21215	1.73205	1		1.21215	1.73205	1
								1.59741	23.5249	1.02282		1.59741	23.5249	1.02282
								1.56135	8.60774	1.03625		1.56135	8.60774	1.03625
								1.06404	15.9213	1.14308		1.06404	15.9213	1.14308
								1.79456	24.2796	1.33453		1.79456	24.2796	1.33453
								1.52934	9.94174	1.00427		1.52934	9.94174	1.00427
								1.5181	8.74291	1.08442		1.5181	8.74291	1.08442
								1.41667	3.83055	1.02376		1.41667	3.83055	1.02376
								1.78136	7.31824	1.04546		1.78136	7.31824	1.04546
								1.51996	8.87554	1.03176		1.51996	8.87554	1.03176
								2.2639	11.0515	1.00468		2.2639	11.0515	1.00468
								2.19988	17.7489	1.00807		2.19988	17.7489	1.00807
								1.59853	12.5726	1.09019		1.59853	12.5726	1.09019
								3.26507	13.4047	1.00191		3.26507	13.4047	1.00191
								2.36646	4.75232	1.0132		2.36646	4.75232	1.0132
								2.8024	5.11814	1.00375		2.8024	5.11814	1.00375
								2.39034	4.81097	1.0257		2.39034	4.81097	1.0257
								2.09605	7.5139	1.17347		2.09605	7.5139	1.17347
								2.67046	31.1139	1.01536		2.67046	31.1139	1.01536
								1.93608	4.6992	1.00187		1.93608	4.6992	1.00187
								1.3986	7.4157	1.01863		1.3986	7.4157	1.01863
								4.23749	14.6579	1.01391		4.23749	14.6579	1.01391
								1.73904	19.5697	1.05056		1.73904	19.5697	1.05056
								1.83267	21.9549	1.18373		1.83267	21.9549	1.18373
								1.85302	21.5154	1.21807		1.85302	21.5154	1.21807
								2.23008	3.80382	1.05499		2.23008	3.80382	1.05499
								2.83021	15.7262	1.01092		2.83021	15.7262	1.01092
								1.67552	31.0164	1.15192		1.67552	31.0164	1.15192
								1.48313	11.2016	1.01414		1.48313	11.2016	1.01414
								2.49503	7.32008	1.00549		2.49503	7.32008	1.00549
								1.25469	20.3341	2.34797		1.25469	20.3341	2.34797
								1.54875	1.73205	1		1.54875	1.73205	1
								2.15473	5.16883	1.01369		2.15473	5.16883	1.01369
								2.0021	8.61668	1.14131		2.0021	8.61668	1.14131
								1.78406	12.5834	1.04141		1.78406	12.5834	1.04141
								1.81856	8.16321	1.04519		1.81856	8.16321	1.04519
								2.51166	10.7699	1.0087		2.51166	10.7699	1.0087
								1.55485	3.28153	1.09384		1.55485	3.28153	1.09384
								1.56576	10.835	1.0426		1.56576	10.835	1.0426
								1.72613	22.8302	1.11135		1.72613	22.8302	1.11135
								1.55712	6	1		1.55712	6	1
								1.19504	20.1819	1.06074		1.19504	20.1819	1.06074
								1.75731	36.6469	1.12934		1.75731	36.6469	1.12934
								1.42784	10.3255	1.02742		1.42784	10.3255	1.02742
								1.32819	8.46202	1.08345		1.32819	8.46202	1.08345
								3.19319	7.62086	1.00067		3.19319	7.62086	1.00067
								1.21648	10.8708	1.12725		1.21648	10.8708	1.12725
								1.74217	23.3269	1.28605		1.74217	23.3269	1.28605
								1.6537	8.90765	1.11346		1.6537	8.90765	1.11346
								2.52295	1.73205	1		2.52295	1.73205	1
								2.24962	6.01893	1.11769		2.24962	6.01893	1.11769
								1.40176	5.19615	1		1.40176	5.19615	1
								1.56789	19.4068	1.58986		1.56789	19.4068	1.58986
								1.51599	4.6992	1.00187		1.51599	4.6992	1.00187
								1.2613	8.50744	1.03168		1.2613	8.50744	1.03168
								2.1358	8.60018	1.14925		2.1358	8.60018	1.14925
								2.45181	3.03692	1.01231		2.45181	3.03692	1.01231
								1.48793	23.8046	1.16712		1.48793	23.8046	1.16712
								2.28461	27.6651	1.02746		2.28461	27.6651	1.02746
								2.87144	17.5071	1.01758		2.87144	17.5071	1.01758
								2.14322	19.6434	1.1535		2.14322	19.6434	1.1535
								0.576184	3.14626	1.40705		0.576184	3.14626	1.40705
								1.48371	3.23359	1.07786		1.48371	3.23359	1.07786
								1.2116	3.4641	1.22474		1.2116	3.4641	1.22474
								2.3161	6.73529	1.00404		2.3161	6.73529	1.00404
								1.93232	4.6992	1.00187		1.93232	4.6992	1.00187
								1.40702	12.9125	1.12817		1.40702	12.9125	1.12817
								1.10948	3.03692	1.01231		1.10948	3.03692	1.01231
								4.7561	1.41421	1		4.7561	1.41421	1
								4.93555	4.28731	1.03983		4.93555	4.28731	1.03983
								2.90613	14.634	1.0196		2.90613	14.634	1.0196
								1.73053	15.7478	1.01441		1.73053	15.7478	1.01441
								1.46784	19.2104	1.03425		1.46784	19.2104	1.03425
								1.43261	16.6875	1.1543		1.43261	16.6875	1.1543
								1.53071	10.0956	1.01465		1.53071	10.0956	1.01465
								2.38107	9.1219	1.01354		2.38107	9.1219	1.01354
								3.39594	11.7029	1.03038		3.39594	11.7029	1.03038
								1.78403	1.73205	1		1.78403	1.73205	1
								1.56294	6.55566	1.01156		1.56294	6.55566	1.01156
								3.52137	3.72688	1.07586		3.52137	3.72688	1.07586
								2.16675	2.82843	1		2.16675	2.82843	1
								1.24165	19.2879	1.2718		1.24165	19.2879	1.2718
								1.97324	10.3925	1.00468		1.97324	10.3925	1.00468
								2.97499	14.2622	1.12054		2.97499	14.2622	1.12054
								1.44675	6.84943	1.02105		1.44675	6.84943	1.02105
								1.30411	9.33058	1.03673		1.30411	9.33058	1.03673
								2.13285	8.78682	1.00792		2.13285	8.78682	1.00792
								1.70645	7.15954	1.17702		1.70645	7.15954	1.17702
								1.56164	26.9935	1.04285		1.56164	26.9935	1.04285
								1.55873	6.98623	1.078		1.55873	6.98623	1.078
								1.81707	15.3193	1.0752		1.81707	15.3193	1.0752
								1.53092	38.6703	1.45952		1.53092	38.6703	1.45952
								1.52681	12.8415	1.08145		1.52681	12.8415	1.08145
								1.31507	47.6114	1.08348		1.31507	47.6114	1.08348
								1.61187	33.5237	1.02199		1.61187	33.5237	1.02199
								3.38756	2.73205	1.11536		3.38756	2.73205	1.11536
								1.53107	11.1981	1.30176		1.53107	11.1981	1.30176
								2.37436	2.5184	1.02813		2.37436	2.5184	1.02813
								1.91732	19.1864	1.24893		1.91732	19.1864	1.24893
								1.1812	13.1971	1.1275		1.1812	13.1971	1.1275
								1.17769	5.57265	1.01742		1.17769	5.57265	1.01742
								2.22649	5.84234	1.00195		2.22649	5.84234	1.00195
								1.53769	12.0851	1.08093		1.53769	12.0851	1.08093
								1.40342	7.34847	1		1.40342	7.34847	1
								3.11671	7.11929	1.00682		3.11671	7.11929	1.00682
								2.06119	3.23359	1.07786		2.06119	3.23359	1.07786
								1.76673	11.0384	1.07215		1.76673	11.0384	1.07215
								1.19032	18.5394	1.36304		1.19032	18.5394	1.36304
								1.59866	4.34554	1.02425		1.59866	4.34554	1.02425
								3.42038	3.61537	1.00272		3.42038	3.61537	1.00272
								1.70734	6.85235	1.04497		1.70734	6.85235	1.04497
								2.6846	4.75232	1.0132		2.6846	4.75232	1.0132
								1.65741	5.89948	1.01175		1.65741	5.89948	1.01175
								2.45671	6.42529	1.04232		2.45671	6.42529	1.04232
								2.77845	20.3033	1.03475		2.77845	20.3033	1.03475
								1.56305	2.54951	1.04083		1.56305	2.54951	1.04083
								1.77644	54.0114	1.24535		1.77644	54.0114	1.24535
								1.97057	6.07464	1.12803		1.97057	6.07464	1.12803
								2.23423	5.59711	1.03936		2.23423	5.59711	1.03936
								1.39965	11.9005	1.02046		1.39965	11.9005	1.02046
								1.27154	19.0603	1.03674		1.27154	19.0603	1.03674
								1.12036	8.8641	1.05946		1.12036	8.8641	1.05946
								2.03867	12.1572	1.07038		2.03867	12.1572	1.07038
								1.16982	12.8478	1.16319		1.16982	12.8478	1.16319
								1.35276	11.4273	1.07026		1.35276	11.4273	1.07026
								1.56266	21.1868	1.12766		1.56266	21.1868	1.12766
								1.28405	16.7203	1.06822		1.28405	16.7203	1.06822
								1.29583	11.7733	1.01706		1.29583	11.7733	1.01706
								2.48335	15.5276	1.12649		2.48335	15.5276	1.12649
								2.19709	8.05955	1.21502		2.19709	8.05955	1.21502
[truncated: 16,810 more rows]
