# Supplementary material for: A Novel and Open-Source Application for Vasculature Dataset Analysis and Visualization
Source: Research Square preprint supplement (doi:10.21203/rs.3.rs-608609/v1), 2021-06-11
Supplement: Supplementary file 5 [file a8b9d808bf638e39dd7fb820.docx]

**Supplemental Figure 1**

**Supplemental Figure 1 –** Visualization of Euclidean distance transform (EDT) vs modified EDT (mEDT) radius calculations for nearest neighbors along the 1st, 2nd, and 3rd dimensions. **a,** mEDT distance calculations to nearest neighbors located along any 1st dimension direction have 0.5 unit corrections. **b-c,** mEDT distances to the nearest neighbors located along the 2nd or 3rd dimensions are calculated in the same manner.
