# Supplementary material for: A Novel and Open-Source Application for Vasculature Dataset Analysis and Visualization
Source: Research Square preprint supplement (doi:10.21203/rs.3.rs-608609/v1), 2021-06-11
Supplement: Supplementary file 6 [file c0faa8f9ef95aba0bd8d52a0.xlsx]

## Sheet: Main Results
	Raw Results
			Main Results									Number of Segments per Radius Bin																					Mean Length of Segments per Radius Bin
		File Name	Volume (µm³)/Area (µm²)	Skeleton Length (µm)	Branchpoints	Endpoints	Number of Segments	Mean Segment Length (µm)	Mean Segment Radius (µm)	Mean Segment Tortuosity	Segment Partitioning	0 - 1	1 - 2	2 - 3	3 - 4	4 - 5	5 - 6	6 - 7	7 - 8	8 - 9	9 - 10	10 - 11	11 - 12	12 - 13	13 - 14	14 - 15	15 - 16	16 - 17	17 - 18	18 - 19	19 - 20	20+	0 - 1	1 - 2	2 - 3	3 - 4	4 - 5	5 - 6	6 - 7	7 - 8	8 - 9	9 - 10	10 - 11	11 - 12	12 - 13	13 - 14	14 - 15	15 - 16	16 - 17
		01_IC	3.00355e+07	2.10023e+06	26415	17114	48599	43.2156	5.19577	1.12054	0.0231398	0	174	1851	11420	14242	8816	5503	2949	1656	692	365	278	209	145	98	53	59	33	25	4	27		94.4128	22.0597	189.513	17.4741	61.5221	59.6426	114.935	81.9662	94.3179	18.1381	115.1	73.7539	26.4353	134.295	83.8731	34.3248
		02_IC	1.13979e+07	591510	8718	7190	16908	34.984	5.82912	1.09475	0.0285845	0	121	514	2823	4201	3143	2151	1388	1035	582	287	185	137	81	76	66	63	31	4	2	18		18.3973	149.536	40.217	90.8622	64.0282	56.2899	70.4138	124.556	17.2939	10.4305	16.1368	39.2433	22.3946	55.6848	25.8221	49.5968
		03_IC	2.29268e+07	1.69125e+06	19285	14223	36229	46.6822	5.06561	1.13401	0.0214214	0	112	1832	9767	10069	6160	3846	1920	1103	516	270	177	138	81	58	56	37	47	15	8	17		149.272	36.7024	97.6087	56.4512	236.614	100.317	150.869	113.209	11.5459	28.2395	113.417	12.8313	67.1654	46.1392	196.289	21.3302
		04_IC	1.05703e+07	669297	8422	8116	16780	39.8866	5.1689	1.10674	0.0250711	0	85	950	4560	4478	2574	1642	936	617	281	174	147	111	67	40	41	37	22	9	5	4		115.759	45.7963	99.8965	62.3552	20.7702	49.3028	24.8608	40.6155	96.8605	9.38866	34.0735	19.2221	136.968	43.2866	119.517	101.627
		05_IC	1.46814e+07	730794	7598	7846	16466	44.382	5.83907	1.10725	0.0225317	0	116	722	3189	4480	2613	1730	1162	800	380	267	203	166	93	89	92	76	79	51	58	100		19.8763	40.1838	61.561	52.2944	59.9312	17.7283	95.9212	46.7347	13.5	45.8446	30.5012	120.656	94.5037	105.688	23.3541	81.6452
		06_IC	1.1552e+07	559224	9380	6996	18409	30.3777	5.46443	1.10164	0.0329188	0	152	1100	4127	4773	3079	1764	1100	793	424	262	224	149	135	84	106	67	42	10	6	12		21.8782	113.151	37.75	31.7124	56.3062	38.7985	28.31	18.579	295.918	6.1581	44.0192	49.1828	55.6187	85.5696	24.8748	34.2637
		07_IC	1.31693e+07	826966	9085	9328	18348	45.0712	5.11768	1.11347	0.0221871	0	52	910	4945	5158	2812	1916	1040	680	305	170	107	88	37	43	39	25	13	5	2	1		110.36	54.9096	24.8859	75.9059	49.546	151.12	196.088	69.9332	69.178	44.0014	66.4026	103.088	153.221	52.8298	48.1222	102.149
		08_IC	1.33443e+07	905323	11455	7981	21400	42.3048	5.10228	1.13018	0.023638	0	201	1265	5354	5815	3666	2240	1195	721	367	198	122	73	57	36	24	12	16	0	6	32		17.7922	129.122	32.1699	185.403	10.9882	21.5239	35.4301	98.6818	67.6978	8.19969	107.122	33.6449	142.603	80.7622	30.5818	6.88368
		09_IC	2.31897e+07	1.749e+06	19686	15263	37342	46.8374	4.95319	1.13056	0.0213505	0	80	1946	10626	10457	6283	3926	1801	1090	437	224	135	132	69	39	14	20	26	20	6	11		30.5427	79.3468	51.1876	77.6055	33.0304	63.1626	240.571	59.9712	29.9117	93.9972	39.2332	92.9572	17.214	51.1866	212.15	67.2179
		10_IC	1.42943e+07	949242	12348	10719	24029	39.504	4.90929	1.11963	0.0253139	0	143	1918	7199	6486	3610	1910	1045	631	333	172	147	122	90	60	37	41	44	19	13	9		129.709	58.9694	54.5573	68.1577	18.63	111.05	116.846	61.5413	112.28	193.846	24.6984	90.3991	112.656	34.1478	26.9158	12.9006
	Subject	ROI Volumes (µm3)	ROI Volumes (mm3)
	1	3.61866e+08	0.361866
	2	1.78651e+08	0.178651
	3	3.10931e+08	0.310931
	4	1.72993e+08	0.172993
	5	2.89206e+08	0.289206
	6	2.01345e+08	0.201345
	7	2.32678e+08	0.232678
	8	1.88319e+08	0.188319
	9	3.46684e+08	0.346684
	10	2.16183e+08	0.216183
	ROI Corrected Data
	Subject	Sex	Volume (µm³)	Skeleton Length (µm)	Branchpoints	Endpoints	Number of Segments	Average Segment Length (µm)	Average Segment Radius (µm)	Average Segment Tortuosity	Segment Partitioning	0 - 1	1 - 2	2 - 3	3 - 4	4 - 5	5 - 6	6 - 7	7 - 8	8 - 9	9 - 10	10 - 11	11 - 12	12 - 13	13 - 14	14 - 15	15 - 16	16 - 17	17 - 18	18 - 19	19 - 20	20+	0 - 1	1 - 2	2 - 3	3 - 4	4 - 5	5 - 6	6 - 7	7 - 8	8 - 9	9 - 10	10 - 11	11 - 12	12 - 13	13 - 14	14 - 15	15 - 16	16 - 17
	1	Female	8.30016e+07	5.80389e+06	72996.6	47293.7	134301	43.2156	5.19577	1.12054	0.0231398	0	480.84	5115.15	31558.6	39357.1	24362.6	15207.3	8149.42	4576.27	1912.31	1008.66	768.239	577.561	400.7	270.818	146.463	163.044	91.1939	69.0863	11.0538	74.6132		94.4128	22.0597	189.513	17.4741	61.5221	59.6426	114.935	81.9662	94.3179	18.1381	115.1	73.7539	26.4353	134.295	83.8731	34.3248
	2	Male	6.37998e+07	3.31099e+06	48799.2	40246.2	94642.9	34.984	5.82912	1.09475	0.0285845	0	677.3	2877.12	15801.8	23515.2	17593	12040.3	7769.36	5793.43	3257.76	1606.49	1035.54	766.86	453.399	425.411	369.436	352.644	173.523	22.3901	11.195	100.755		18.3973	149.536	40.217	90.8622	64.0282	56.2899	70.4138	124.556	17.2939	10.4305	16.1368	39.2433	22.3946	55.6848	25.8221	49.5968
	3	Female	7.37361e+07	5.43931e+06	62023.4	45743.3	116518	46.6822	5.06561	1.13401	0.0214214	0	360.209	5891.99	31412.1	32383.4	19811.5	12369.3	6175.01	3547.41	1659.53	868.36	569.258	443.829	260.508	186.537	180.104	118.998	151.159	48.2422	25.7292	54.6745		149.272	36.7024	97.6087	56.4512	236.614	100.317	150.869	113.209	11.5459	28.2395	113.417	12.8313	67.1654	46.1392	196.289	21.3302
	4	Male	6.11021e+07	3.86892e+06	48684	46915.1	96998	39.8866	5.1689	1.10674	0.0250711	0	491.348	5491.54	26359.4	25885.4	14879.2	9491.7	5410.61	3566.61	1624.34	1005.82	849.744	641.643	387.298	231.223	237.003	213.881	127.173	52.0251	28.9029	23.1223		115.759	45.7963	99.8965	62.3552	20.7702	49.3028	24.8608	40.6155	96.8605	9.38866	34.0735	19.2221	136.968	43.2866	119.517	101.627
	5	Female	5.07645e+07	2.5269e+06	26272	27129.5	56935.3	44.382	5.83907	1.10725	0.0225317	0	401.099	2496.49	11026.8	15490.7	9035.1	5981.91	4017.9	2766.2	1313.94	923.219	701.923	573.986	321.571	307.74	318.113	262.789	273.162	176.345	200.549	345.775		19.8763	40.1838	61.561	52.2944	59.9312	17.7283	95.9212	46.7347	13.5	45.8446	30.5012	120.656	94.5037	105.688	23.3541	81.6452
	6	Male	5.73742e+07	2.77744e+06	46586.7	34746.3	91430.1	30.3777	5.46443	1.10164	0.0329188	0	754.923	5463.26	20497.2	23705.6	15292.2	8761.08	5463.26	3938.51	2105.84	1301.25	1112.52	740.023	670.491	417.194	526.459	332.762	208.597	49.666	29.7996	59.5992		21.8782	113.151	37.75	31.7124	56.3062	38.7985	28.31	18.579	295.918	6.1581	44.0192	49.1828	55.6187	85.5696	24.8748	34.2637
	7	Female	5.65988e+07	3.55413e+06	39045.4	40089.8	78855.8	45.0712	5.11768	1.11347	0.0221871	0	223.485	3910.99	21252.6	22168	12085.4	8234.57	4469.7	2922.5	1310.83	730.624	459.864	378.206	159.018	184.805	167.614	107.445	55.8713	21.4889	8.59558	4.29779		110.36	54.9096	24.8859	75.9059	49.546	151.12	196.088	69.9332	69.178	44.0014	66.4026	103.088	153.221	52.8298	48.1222	102.149
	8	Male	7.086e+07	4.80739e+06	60827.6	42380.2	113637	42.3048	5.10228	1.13018	0.023638	0	1067.34	6717.32	28430.5	30878.5	19467	11894.7	6345.61	3828.61	1948.82	1051.41	647.837	387.64	302.678	191.165	127.443	63.7217	84.9622	0	31.8608	169.924		17.7922	129.122	32.1699	185.403	10.9882	21.5239	35.4301	98.6818	67.6978	8.19969	107.122	33.6449	142.603	80.7622	30.5818	6.88368
	9	Female	6.68901e+07	5.04494e+06	56783.6	44025.6	107712	46.8374	4.95319	1.13056	0.0213505	0	230.757	5613.18	30650.4	30162.9	18123.1	11324.4	5194.93	3144.07	1260.51	646.121	389.403	380.75	199.028	112.494	40.3826	57.6894	74.9962	57.6894	17.3068	31.7292		30.5427	79.3468	51.1876	77.6055	33.0304	63.1626	240.571	59.9712	29.9117	93.9972	39.2332	92.9572	17.214	51.1866	212.15	67.2179
	10	Male	6.61215e+07	4.39093e+06	57118.4	49583.1	111151	39.504	4.90929	1.11963	0.0253139	0	661.478	8872.13	33300.6	30002.4	16698.9	8835.13	4833.88	2918.83	1540.36	795.624	679.981	564.338	416.315	277.543	171.152	189.655	203.532	87.8887	60.1344	41.6315		129.709	58.9694	54.5573	68.1577	18.63	111.05	116.846	61.5413	112.28	193.846	24.6984	90.3991	112.656	34.1478	26.9158	12.9006
	Sorted Data
	Subject	Sex	Volume (µm³)	Skeleton Length (µm)	Branchpoints	Endpoints	Number of Segments	Average Segment Length (µm)	Average Segment Radius (µm)	Average Segment Tortuosity	Segment Partitioning	0 - 1	1 - 2	2 - 3	3 - 4	4 - 5	5 - 6	6 - 7	7 - 8	8 - 9	9 - 10	10 - 11	11 - 12	12 - 13	13 - 14	14 - 15	15 - 16	16 - 17	17 - 18	18 - 19	19 - 20	20+	0 - 1	1 - 2	2 - 3	3 - 4	4 - 5	5 - 6	6 - 7	7 - 8	8 - 9	9 - 10	10 - 11	11 - 12	12 - 13	13 - 14	14 - 15	15 - 16	16 - 17
	1	Female	8.30016e+07	5.80389e+06	72996.6	47293.7	134301	43.2156	5.19577	1.12054	0.0231398	0	480.84	5115.15	31558.6	39357.1	24362.6	15207.3	8149.42	4576.27	1912.31	1008.66	768.239	577.561	400.7	270.818	146.463	163.044	91.1939	69.0863	11.0538	74.6132		94.4128	22.0597	189.513	17.4741	61.5221	59.6426	114.935	81.9662	94.3179	18.1381	115.1	73.7539	26.4353	134.295	83.8731	34.3248
	3	Female	7.37361e+07	5.43931e+06	62023.4	45743.3	116518	46.6822	5.06561	1.13401	0.0214214	0	360.209	5891.99	31412.1	32383.4	19811.5	12369.3	6175.01	3547.41	1659.53	868.36	569.258	443.829	260.508	186.537	180.104	118.998	151.159	48.2422	25.7292	54.6745		149.272	36.7024	97.6087	56.4512	236.614	100.317	150.869	113.209	11.5459	28.2395	113.417	12.8313	67.1654	46.1392	196.289	21.3302
	5	Female	5.07645e+07	2.5269e+06	26272	27129.5	56935.3	44.382	5.83907	1.10725	0.0225317	0	401.099	2496.49	11026.8	15490.7	9035.1	5981.91	4017.9	2766.2	1313.94	923.219	701.923	573.986	321.571	307.74	318.113	262.789	273.162	176.345	200.549	345.775		19.8763	40.1838	61.561	52.2944	59.9312	17.7283	95.9212	46.7347	13.5	45.8446	30.5012	120.656	94.5037	105.688	23.3541	81.6452
	7	Female	5.65988e+07	3.55413e+06	39045.4	40089.8	78855.8	45.0712	5.11768	1.11347	0.0221871	0	223.485	3910.99	21252.6	22168	12085.4	8234.57	4469.7	2922.5	1310.83	730.624	459.864	378.206	159.018	184.805	167.614	107.445	55.8713	21.4889	8.59558	4.29779		110.36	54.9096	24.8859	75.9059	49.546	151.12	196.088	69.9332	69.178	44.0014	66.4026	103.088	153.221	52.8298	48.1222	102.149
	9	Female	6.68901e+07	5.04494e+06	56783.6	44025.6	107712	46.8374	4.95319	1.13056	0.0213505	0	230.757	5613.18	30650.4	30162.9	18123.1	11324.4	5194.93	3144.07	1260.51	646.121	389.403	380.75	199.028	112.494	40.3826	57.6894	74.9962	57.6894	17.3068	31.7292		30.5427	79.3468	51.1876	77.6055	33.0304	63.1626	240.571	59.9712	29.9117	93.9972	39.2332	92.9572	17.214	51.1866	212.15	67.2179
	2	Male	6.37998e+07	3.31099e+06	48799.2	40246.2	94642.9	34.984	5.82912	1.09475	0.0285845	0	677.3	2877.12	15801.8	23515.2	17593	12040.3	7769.36	5793.43	3257.76	1606.49	1035.54	766.86	453.399	425.411	369.436	352.644	173.523	22.3901	11.195	100.755		18.3973	149.536	40.217	90.8622	64.0282	56.2899	70.4138	124.556	17.2939	10.4305	16.1368	39.2433	22.3946	55.6848	25.8221	49.5968
	4	Male	6.11021e+07	3.86892e+06	48684	46915.1	96998	39.8866	5.1689	1.10674	0.0250711	0	491.348	5491.54	26359.4	25885.4	14879.2	9491.7	5410.61	3566.61	1624.34	1005.82	849.744	641.643	387.298	231.223	237.003	213.881	127.173	52.0251	28.9029	23.1223		115.759	45.7963	99.8965	62.3552	20.7702	49.3028	24.8608	40.6155	96.8605	9.38866	34.0735	19.2221	136.968	43.2866	119.517	101.627
	6	Male	5.73742e+07	2.77744e+06	46586.7	34746.3	91430.1	30.3777	5.46443	1.10164	0.0329188	0	754.923	5463.26	20497.2	23705.6	15292.2	8761.08	5463.26	3938.51	2105.84	1301.25	1112.52	740.023	670.491	417.194	526.459	332.762	208.597	49.666	29.7996	59.5992		21.8782	113.151	37.75	31.7124	56.3062	38.7985	28.31	18.579	295.918	6.1581	44.0192	49.1828	55.6187	85.5696	24.8748	34.2637
	8	Male	7.086e+07	4.80739e+06	60827.6	42380.2	113637	42.3048	5.10228	1.13018	0.023638	0	1067.34	6717.32	28430.5	30878.5	19467	11894.7	6345.61	3828.61	1948.82	1051.41	647.837	387.64	302.678	191.165	127.443	63.7217	84.9622	0	31.8608	169.924		17.7922	129.122	32.1699	185.403	10.9882	21.5239	35.4301	98.6818	67.6978	8.19969	107.122	33.6449	142.603	80.7622	30.5818	6.88368
	10	Male	6.61215e+07	4.39093e+06	57118.4	49583.1	111151	39.504	4.90929	1.11963	0.0253139	0	661.478	8872.13	33300.6	30002.4	16698.9	8835.13	4833.88	2918.83	1540.36	795.624	679.981	564.338	416.315	277.543	171.152	189.655	203.532	87.8887	60.1344	41.6315		129.709	58.9694	54.5573	68.1577	18.63	111.05	116.846	61.5413	112.28	193.846	24.6984	90.3991	112.656	34.1478	26.9158	12.9006
[truncated: 25 more columns]
