# Supplementary material for: A Novel and Open-Source Application for Vasculature Dataset Analysis and Visualization
Source: Research Square preprint supplement (doi:10.21203/rs.3.rs-608609/v1), 2021-06-11
Supplement: Supplementary file 7 [file c49034b868c83d114e1f4cb6.docx]

**Supplemental Figure 2**

**Supplemental Figure 2 –** VesselVio analysis and visualization pages. **a,** The analysis page with options to change image resolution, alter segment pruning parameters, save results for individual segments, and save graph files for custom network analyses. **b,** The visualization page for observation of vascular networks in simple form or scaled form (as shown). Meshes can be colored by segment radius, length, or tortuosity features with various pre-loaded color themes. Networks can be visualized alongside original voxel/pixels or smoothed volume meshes for result examinations.
