# Supplementary material for: A Novel and Open-Source Application for Vasculature Dataset Analysis and Visualization
Source: Research Square preprint supplement (doi:10.21203/rs.3.rs-608609/v1), 2021-06-11
Supplement: Supplementary file 8 [file 2a9bcf03a4eb5d6597195cd0.xlsx]

## Sheet: Branchpoint Testing
Branchpoint Removal Statistics
Synthetic Dataset	Cleared Cliques	Remaining Cliques	% Cliques Removed	Spurious Branchpoints Removed	Ground-Truth Branchpoints	VesselVio Branchpoints	% Error	VesSAP/ImageJ Branchpoints	% Error
1	844	2	0.99763	1707	1786	1715	0.0397536	3855	1.15845
2	802	7	0.991272	1647	1613	1685	0.0446373	3714	1.30254
3	811	3	0.996301	1649	1675	1730	0.0328358	3770	1.25075
4	832	3	0.996394	1698	1770	1683	0.0491525	3762	1.12542
5	841	2	0.997622	1706	1711	1683	0.0163647	3818	1.23144
6	860	5	0.994186	1741	1743	1725	0.010327	3853	1.21056
7	802	4	0.995012	1613	1717	1707	0.00582411	3718	1.1654
8	786	4	0.994911	1594	1651	1658	0.00423985	3642	1.20594
9	823	2	0.99757	1665	1742	1710	0.0183697	3788	1.17451
10	840	5	0.994048	1702	1846	1786	0.0325027	3925	1.12622
11	805	9	0.98882	1644	1643	1751	0.0657334	3764	1.29093
12	844	4	0.995261	1711	1688	1709	0.0124408	3791	1.24585
13	910	3	0.996703	1849	1733	1766	0.0190421	3993	1.3041
14	772	2	0.997409	1558	1581	1609	0.0177103	3561	1.25237
15	854	2	0.997658	1716	1689	1663	0.0153937	3772	1.23327
16	812	2	0.997537	1650	1714	1665	0.0285881	3731	1.17678
17	856	3	0.996495	1725	1769	1675	0.0531374	3817	1.15772
18	810	2	0.997531	1641	1671	1666	0.00299222	3693	1.21005
19	868	3	0.996544	1780	1649	1682	0.0200121	3848	1.33354
20	842	0	1	1699	1626	1653	0.0166052	3739	1.29951
	Mean % Removed:		0.995945				Mean Error:	0.0252831	Mean Error:	1.22277
Notes:									Download Links:
Ground-truth bifurcation counts methods (python 3.8.8): 1. Threshold of 3.0 applied to images. 2. Skeletonization applied (skimage.morphology.skeletonize_3d) 3. Components counted (scipy.ndimage.label) Holes were manually filled in the synthetic datasets. For the analyses, endpoint segments were pruned from datasets if longer than 6 px.									Synthetic dataset with manually filled holes
									Original Synthetic Datasets
									Tetteh et al. 2020

## Sheet: Branch Point Filtering Results
	Keys: h - Healthy, dr - Diabetic Retinopathy, g - Glaucomatous Eyes; IC - Inferior Colliculi
	2D Datasets								3D Datasets								Stats
	Dataset	Identified Cliques (#)	Remaining Cliques (#)	Percent Cliques Removed	Original Branchpoint Count (#)	Branchpoints Removed (#)	Percent Branchpoints Removed		Dataset	Identified Cliques (#)	Remaining Cliques (#)	Percent Cliques Removed	Original Branchpoint Count (#)	Branchpoints Removed (#)	Percent Branchpoints Removed			Mean % Removal
	01_h	154	0	1	722	327	0.452909		7_IC	10361	27	0.997394	47485	21721	0.457429		Dimensions	2D	3D
	02_h	142	0	1	646	293	0.45356		9_IC	3407	13	0.996184	15651	7223	0.461504		Cliques	0.998702	0.997044
	03_h	165	0	1	730	338	0.463014		11_IC	7258	12	0.998347	32847	15084	0.45922		Branchpoints	0.466727	0.459788
	04_h	145	0	1	640	298	0.465625		27_IC	2898	8	0.997239	13356	5983	0.447963
	05_h	146	1	0.993151	643	300	0.466563		47_IC	3729	4	0.998927	16533	7683	0.464707
	06_h	182	0	1	817	372	0.455324		49_IC	3397	10	0.997056	15230	7075	0.464544
	07_h	133	0	1	553	270	0.488246		51_IC	7866	12	0.998474	35474	16280	0.458928
	08_h	160	0	1	686	322	0.469388		63_IC	3595	10	0.997218	16671	7669	0.46002
	09_h	133	0	1	611	273	0.446809		65_IC	4418	37	0.991625	20534	9403	0.457923
	10_h	176	0	1	783	364	0.464879		67_IC	4934	10	0.997973	22238	10355	0.465644
	11_h	137	1	0.992701	591	275	0.465313
	12_h	138	0	1	625	278	0.4448
	13_h	130	0	1	557	269	0.482944
	14_h	134	0	1	569	273	0.479789
	15_h	128	0	1	502	256	0.50996
	01_dr	102	0	0.994413	454	217	0.477974
	02_dr	120	0	0.995025	561	253	0.45098
	03_dr	105	0	1	467	219	0.468951
	04_dr	120	0	1	506	245	0.48419
	05_dr	131	0	1	596	265	0.444631
	06_dr	244	1	1	1150	516	0.448696
	07_dr	150	0	1	695	316	0.454676
	08_dr	168	0	0.994924	734	360	0.490463
	09_dr	156	0	0.990148	702	337	0.480057
	10_dr	185	1	1	817	379	0.463892
	11_dr	189	0	1	885	408	0.461017
	12_dr	238	0	1	1030	501	0.486408
	13_dr	144	0	1	649	300	0.46225
	14_dr	258	0	0.995935	1135	542	0.477533
	15_dr	137	0	0.994792	578	282	0.487889
	01_g	179	1	1	828	391	0.472222
	02_g	201	1	1	913	410	0.449069
	03_g	105	0	1	506	215	0.424901
	04_g	159	0	1	683	331	0.484627
	05_g	138	0	1	657	295	0.449011
	06_g	164	0	0.995902	740	342	0.462162
	07_g	181	0	1	812	378	0.465517
	08_g	197	1	1	900	421	0.467778
	09_g	203	2	1	895	426	0.475978
	10_g	183	0	0.994595	826	389	0.470944
	11_g	228	0	1	1012	470	0.464427
	12_g	251	0	1	1127	534	0.473824
	13_g	209	0	1	952	431	0.452731
	14_g	246	1	1	1086	520	0.478821
	15_g	192	1	1	894	413	0.461969
