# Supplementary material for: A Novel and Open-Source Application for Vasculature Dataset Analysis and Visualization
Source: Research Square preprint supplement (doi:10.21203/rs.3.rs-608609/v1), 2021-06-11
Supplement: Supplementary file 9 [file 92c3ddb77a0d9c4e7bcc464f.xlsx]

## Sheet: Main Results
	Main Results									Number of Segments per Radius Bin																					Mean Length of Segments per Radius Bin
File Name	Volume (µm³)/Area (µm²)	Skeleton Length (µm)	Branchpoints	Endpoints	Number of Segments	Mean Segment Length (µm)	Mean Segment Radius (µm)	Mean Segment Tortuosity	Segment Partitioning	0 - 1	1 - 2	2 - 3	3 - 4	4 - 5	5 - 6	6 - 7	7 - 8	8 - 9	9 - 10	10 - 11	11 - 12	12 - 13	13 - 14	14 - 15	15 - 16	16 - 17	17 - 18	18 - 19	19 - 20	20+	0 - 1	1 - 2	2 - 3	3 - 4	4 - 5	5 - 6	6 - 7	7 - 8	8 - 9	9 - 10	10 - 11	11 - 12	12 - 13	13 - 14	14 - 15	15 - 16	16 - 17	17 - 18	18 - 19
01_h	833888	82374.4	397	314	756	108.961	5.60585	1.03119	0.00917761	0	24	211	118	74	62	31	39	37	32	60	22	27	9	1	7	0	1	1	0	0		120.263	77.0428	78.8382	252.281	342.32	23.1134	62.5133	142.728	11.7005	196.356	58.789	54.6217	165.889	24.076	28.3873		398.945	115.567
02_h	808438	74019.4	354	251	659	112.321	5.91595	1.02496	0.00890308	0	8	133	108	79	85	42	30	36	44	26	27	22	9	4	5	0	1	0	0	0		342.914	12.7793	651.199	61.3883	11.7956	302.223	43.0886	11.5118	35.2848	305.857	473.451	44.5338	11.1183	39.4724	36.7881		170.7
03_h	864171	74072	393	295	738	100.369	6.17693	1.03106	0.00996328	0	4	73	150	107	139	57	37	36	28	39	20	23	7	3	5	2	2	0	0	6		75.4042	26.0171	43.7854	129.472	31.2327	289.478	355.413	10.8169	358.308	47.7686	133.1	42.4133	16.8031	218.512	183.71	43.867	280.009
04_h	771601	72137.5	344	259	647	111.495	6.34646	1.02993	0.00896898	0	12	131	122	56	63	34	45	31	40	36	21	11	10	8	7	1	4	3	3	9		66.9794	116.445	133.645	49.2914	140.865	92.2904	44.4135	159.641	88.2821	95.9233	89.9736	99.7581	113.041	193.608	176.131	105.255	51.8756	126.363
05_h	738786	69575.3	349	195	623	111.678	6.14404	1.02719	0.00895433	0	19	135	107	46	57	47	49	32	33	19	20	16	15	7	7	4	3	1	2	4		141.151	16.4541	55.0397	120.986	268.345	497.482	220.744	132.441	59.6064	344.626	363.318	69.0131	90.017	40.3374	119.454	106.563	39.0159	139.088
06_h	829870	85362	448	294	820	104.1	5.89485	1.03096	0.00960615	0	13	216	124	78	77	54	49	58	41	25	17	18	10	16	10	4	2	2	3	3		378.379	197.186	163.245	155.764	85.1894	205.894	89.6089	124.728	121.758	113.953	86.2733	91.9929	6.37509	339.843	50.245	95.311	158.975	103.819
07_h	729013	69442.6	285	208	533	130.286	5.99118	1.03722	0.00767541	0	7	139	76	40	43	40	31	58	32	16	15	8	13	4	5	2	2	1	0	1		237.125	235.372	115.804	247.937	83.8271	253.104	79.177	450.408	116.145	2.82843	401.827	330.135	166.207	101.114	200.147	208.428	8	25.9233
08_h	821627	78388.8	365	284	691	113.443	5.88389	1.0305	0.00881504	0	12	198	97	60	52	43	49	39	38	22	23	20	7	13	11	1	3	1	2	0		76.1497	20.4707	81.0875	54.4933	25.4385	117.919	89.513	56.327	102.064	249.915	334.113	107.312	88.2724	104.099	94.2034	86.3784	2.41421	158.934
09_h	636468	71141.1	339	241	631	112.743	5.13105	1.02947	0.0088697	0	10	215	103	69	51	34	30	25	39	12	11	9	6	5	6	2	1	2	0	1		58.3047	125.611	89.7214	156.395	117.209	78.3424	424.48	35.8212	32.8169	52.8742	95.9123	128.626	98.6599	46.3311	242.349	66.7777	208.723	61.4069
10_h	705438	80144.9	424	313	793	101.065	4.89186	1.02805	0.00989458	0	27	296	104	69	71	38	63	31	28	25	13	9	10	6	3	0	0	0	0	0		90.3544	87.2855	178.63	61.838	8.59068	91.0022	185.053	81.2048	38.561	12.6889	336.03	65.1239	94.0007	50.3978	28.6985
11_h	765355	68892.6	321	236	600	114.821	6.21286	1.03908	0.00870921	0	11	85	106	109	45	42	39	36	32	22	24	16	14	6	5	3	0	2	0	3		62.2586	50.3551	60.0293	117.169	85.1337	61.2723	309.31	427.447	118.974	25.1826	85.694	291.994	60.4415	58.5841	11.4549	117.009		117.321
12_h	859295	73271	351	264	659	111.185	6.72162	1.0386	0.00899401	1	1	83	158	83	49	39	22	33	49	39	18	21	16	22	7	9	1	1	3	4	38.1102	111.956	157.087	89.8014	197.626	49.4681	77.1912	169.276	299.9	186.706	129.761	10	112.477	169.702	183.391	85.1075	62.0466	83.3629	184.633
13_h	712528	65888.1	290	239	555	118.717	6.01696	1.02859	0.00842337	0	8	81	150	59	45	28	29	39	34	28	12	13	15	3	3	1	2	2	0	3		157.232	107.377	47.7357	115.018	73.7136	137.349	187.646	95.5953	76.1439	54.9222	68.4897	41.6754	15.4154	38.5917	240.425	69.032	246.16	142.817
14_h	714054	66178.7	315	254	600	110.298	5.7792	1.03574	0.00906636	0	9	56	171	86	57	41	43	40	30	30	11	8	5	8	4	0	1	0	0	0		294.815	116.015	84.2819	151.916	210.543	37.1499	148.279	90.0026	140.125	217.689	221.524	135.277	63.0211	141.35	25.8951		9.43289
15_h	641245	59429.1	285	212	534	111.29	5.67654	1.03875	0.0089855	0	7	60	145	75	60	40	40	34	17	15	18	7	8	5	1	0	1	0	1	0		43.9305	435.991	157.748	56.0201	154.745	162.404	7.1694	63.1481	116.024	115.034	179.065	7.39601	81.9844	10	168.929		63.9882
01_g	547632	77897.1	446	245	794	98.1072	4.16682	1.02936	0.0101929	45	237	127	82	49	62	44	50	23	18	17	11	10	3	2	4	2	4	2	1	1	270.76	142.443	86.6955	375.7	13.1077	152.652	72.5272	89.1646	6.37555	115.213	34.2508	147.108	89.3673	144.112	86.874	229.087	20.1726	108.835	45.9153
02_g	609722	83333	504	314	917	90.8757	4.17755	1.02909	0.011004	41	273	160	82	58	59	54	57	37	37	26	20	3	5	1	2	2	0	0	0	0	147.135	116.016	366.374	99.2059	139.196	24.2009	145.615	73.643	59.7852	5.00901	67.497	285.313	12.1098	103.323	130.774	83.8946	42.1414
03_g	472735	63002.8	292	186	533	118.204	4.28281	1.02466	0.00845994	16	121	99	67	44	55	23	43	36	12	6	3	1	2	3	2	0	0	0	0	0	142.935	50.7091	175.134	97.8273	186.095	61.6033	167.23	258.397	30.2464	32.4105	107.448	9.10111	183.74	218.967	494.584	309.044
04_g	526916	69030.4	355	203	635	108.709	4.29616	1.02462	0.00919884	2	132	149	79	50	70	46	41	27	7	10	15	4	1	1	0	1	0	0	0	0	116.871	177.231	90.741	49.2102	151.379	47.2657	336.2	106.675	158.553	174.162	93.267	43.599	83.1322	104.108	238.953		80.7095
05_g	535051	67855	365	213	658	103.123	4.41468	1.02877	0.00969715	14	166	143	82	41	48	19	42	38	16	13	11	9	5	2	1	2	2	0	0	4	210.941	128.328	131.514	157.982	153.552	20.0963	122.506	19.8167	109.976	57.018	145.7	34.0395	80.8165	41.5347	148.492	8.10617	109.362	167.308
06_g	559765	70936.4	400	224	714	99.3508	4.59983	1.03095	0.0100653	7	146	165	91	47	52	58	48	27	11	22	7	14	10	6	0	0	0	0	1	2	189.314	17.9136	76.286	16.3701	204.092	134.758	106.906	7.64057	32.2204	25.724	12.1098	3.176	147.034	177.878	116.195
07_g	532784	76355.5	434	305	807	94.6165	3.98716	1.02771	0.010569	18	200	193	96	54	93	44	29	23	16	16	15	1	2	0	2	0	4	1	0	0	83.1179	41.1612	65.785	106.893	22.964	17.194	160.906	17.5161	132.652	61.2654	14.3279	10.0832	62.7181	76.7362		135.095		109.864	24.872
08_g	555558	81225.4	485	312	889	91.3671	3.86496	1.02486	0.0109449	18	235	222	139	52	58	39	40	15	21	19	8	12	2	4	3	1	0	0	1	0	274.652	33.8464	54.3935	109.2	67.388	177.297	77.211	175.235	144.263	101.138	7.17761	123.153	82.0031	239.047	236.569	76.6702	71.8534
09_g	541943	78694.6	470	323	869	90.5577	3.81993	1.02769	0.0110427	13	230	211	113	63	76	56	36	14	26	7	14	5	3	1	0	1	0	0	0	0	132.343	358.408	162.007	239.695	137.538	111.383	178.574	125.691	28.367	86.2368	81.0576	31.2938	37.5409	22.128	39.5596		79.1916
10_g	536598	77500.1	441	310	818	94.7434	3.82895	1.02455	0.0105548	4	199	231	104	65	41	60	43	39	8	12	8	3	1	0	0	0	0	0	0	0	35.1083	107.229	151.442	25.3485	167.41	48.1202	101.028	113.803	214.74	57.9301	137.947	59.8061	50.3992	93.851
11_g	625693	83350.3	543	358	996	83.685	4.43295	1.03145	0.0119496	6	214	251	122	85	69	48	45	55	39	27	5	7	6	7	4	0	1	1	0	4	109.868	110.031	38.8347	117.508	55.0316	93.6621	48.2442	28.403	71.8294	130.619	95.3217	37.5098	152.104	168.539	250.274	143.84		134.809	83.3505
12_g	676424	91545.1	604	428	1124	81.4458	4.22121	1.02476	0.0122781	1	242	323	147	66	70	57	82	43	23	34	15	9	1	2	3	3	0	0	1	2	12.5342	98.0468	58.3148	155.316	73.8936	169.842	74.0628	8.50891	7	210.224	71.2415	53.366	156.981	258.455	10.511	134.563	53.1355
13_g	556981	80033.8	523	303	938	85.3239	4.01305	1.03431	0.01172	2	159	301	148	72	74	63	44	25	8	16	15	4	0	1	1	1	0	0	1	3	40.3453	119.387	58.4557	63.9174	190.053	52.677	269.607	108.324	47.4526	87.1623	112.734	130.271	253.227		39.199	104.091	180.174
14_g	578169	80971.6	579	283	1019	79.4618	4.32362	1.03227	0.0125847	0	191	278	156	79	104	37	49	38	34	17	13	2	6	4	1	1	1	2	0	6		43.5543	30.5878	47.4108	680.447	148.923	27.6182	70.4073	124.179	428.555	105.327	4.36606	5.35653	290.111	92.3493	61.5973	182.461	6.67638	44.0426
15_g	599188	78835.6	490	310	896	87.9861	4.34634	1.02781	0.0113654	2	181	264	102	63	82	42	55	34	12	20	8	6	5	5	0	2	3	3	1	6	36.1871	102.403	352.064	170.493	23.6793	302.183	142.191	91.0829	25.1318	6.14435	16.1202	85.3049	21.5994	23.5676	253.781		51.4702	207.326	118.707
01_dr	416282	58211.4	242	132	432	134.749	4.44892	1.04261	0.00742123	47	106	77	62	18	49	15	4	3	6	10	7	6	3	2	4	2	2	1	1	7	76.2646	427.376	425.108	17.2071	65.4156	322.141	58.5752	105.855	177.139	151.688	383.443	247.911	2.41421	406.939	172.482	331.379	172.77	12.2683	70.6411
02_dr	521878	69946.3	313	222	583	119.976	4.07333	1.03687	0.00833497	24	158	121	71	50	48	26	23	22	5	7	5	4	3	2	1	4	1	3	1	4	157.183	116.848	288.562	133.972	478.668	133.291	607.311	317.1	103.347	121.997	305.437	119.025	240.277	405.927	7.87499	496.478	145.679	257.341	81.7231
03_dr	494400	60863.3	250	175	464	131.171	4.76359	1.03083	0.00762364	6	115	78	53	34	56	16	25	15	10	16	7	15	13	3	1	1	0	0	0	0	221.414	50.468	33.364	59.7145	169.557	34.2144	6.37555	139.939	19.9823	184.288	9.10977	13.1231	254.023	7.40144	7.07107	305.462	152.187
04_dr	462179	60130	261	172	478	125.795	4.57323	1.02993	0.00794945	28	132	70	54	39	28	20	31	13	10	13	4	10	8	4	7	2	4	0	1	0	68.4265	190.654	310.708	29.7792	136.979	108.645	633.314	280.976	289.189	155.356	212.934	239.104	87.1339	16.8589	225.924	62.4334	84.9075	137.054
05_dr	508978	70622.3	331	225	610	115.774	4.12797	1.02785	0.0086375	20	168	107	67	42	62	52	30	15	13	11	10	2	7	2	1	1	0	0	0	0	15.5256	521.635	99.202	159.395	141.795	26.0581	37.8084	83.3204	53.0302	412.933	47.76	137.473	50.3522	212.793	244.445	248.153	42.0241
06_dr	617966	92036.5	642	327	1130	81.4482	3.79979	1.05737	0.0122777	3	294	364	167	45	47	49	48	27	19	9	24	11	8	4	5	2	2	1	1	0	443.453	98.6704	12.2593	55.4107	53.9786	62.6259	149.956	22.0781	16.0907	97.3523	82.4448	26.0929	11.1183	24.3268	2.41421	107.597	186.694	36.7174	296.245
07_dr	636359	77040.6	380	241	694	111.01	4.63541	1.03932	0.00900824	2	159	150	77	54	59	54	33	28	22	17	9	4	10	4	4	2	2	2	1	1	330.485	95.2504	58.7895	113.438	197.938	380.712	205.901	211.892	170.458	227.325	282.766	43.1498	38.0169	175.849	265.903	593.496	2.82843	28.0876	112.571
08_dr	615777	76745	374	216	673	114.034	4.71935	1.04063	0.0087693	4	156	148	69	38	73	47	36	18	28	15	10	4	9	5	1	2	0	3	2	5	41.397	119.955	68.2643	99.8545	25.468	67.793	186.663	29.2261	252.304	20.7829	160.55	34.8687	195.416	499.006	19.8195	105.647	150.009		45.9776
09_dr	554447	67220.8	371	190	655	102.627	4.9725	1.0715	0.00974401	4	134	130	91	47	58	42	27	37	19	22	9	10	6	4	0	2	2	2	1	8	198.379	185.827	92.34	203.705	386.518	108.817	205.887	236.143	241.865	149.245	285.677	251.184	157.539	182.015	113.147		64.0042	226.85	94.8071
10_dr	714889	83691.1	440	284	804	104.093	4.97143	1.0335	0.00960675	2	82	229	102	77	70	58	56	33	22	22	12	10	6	6	5	3	2	2	1	4	67.4371	181.04	31.9575	26.7704	102.502	133.09	20.2488	31.2442	74.013	401.964	26.1859	7.29326	335.385	54.6091	51.3291	18.2848	44.558	143.625	47.0735
11_dr	692937	87092.7	480	326	889	97.967	4.49453	1.03117	0.0102075	1	166	245	121	62	66	65	41	28	15	33	19	1	6	7	5	2	2	1	1	2	130.158	210.055	43.4383	394.695	78.5019	195.765	11.2114	75.6855	20.0415	50.352	219.858	158.245	219.021	87.908	192.456	117.511	150.036	89.3557	260.887
12_dr	556724	79324.1	535	293	955	83.0619	4.21109	1.05426	0.0120392	16	242	254	83	57	87	54	48	16	35	10	10	20	9	2	3	2	1	1	1	4	54.8288	107.746	125.301	162.964	83.8097	212.776	466.655	149.574	201.369	91.9011	93.5988	59.6548	95.6002	94.6494	70.6665	62.061	55.5967	128.032	162.525
13_dr	559479	71552.6	350	236	646	110.763	4.84632	1.04959	0.00902832	2	131	160	81	36	59	39	23	14	16	28	13	11	13	7	5	2	4	1	0	1	186.695	104.637	283.036	74.5144	164.762	74.8137	64.4431	149.654	57.3204	29.8753	223.627	162.927	131.291	146.288	220.681	74.5134	96.1259	136.378	22.0369
14_dr	624936	84760.2	601	264	1038	81.6572	4.74472	1.06428	0.0122463	12	221	254	120	51	89	70	53	43	23	31	21	15	5	2	7	7	2	0	5	7	37.136	43.5719	119.09	297.101	129.951	140.392	192.583	145.493	119.502	32.0879	77.1588	37.5184	317.353	101.002	78.1273	183.737	105.665	226.322
15_dr	535043	64489.9	296	217	553	116.618	4.66362	1.02969	0.00857499	1	113	147	55	36	44	47	27	28	15	6	6	6	4	3	7	4	1	0	0	3	126.654	170.541	85.4492	118.098	192.798	264.591	85.5873	87.5069	161.344	157.502	301.79	412.672	124.101	6.41736	127.655	163.173	76.8135	124.03
	Isolated segments shorter than 10 px were pruned, and endpoint segments shorter than 5 px were pruned.
[truncated: 23 more columns]
